# Supplementary material for: Combined Metabolomic and Quantitative RT-PCR Analyses Revealed the Synthetic Differences of 2-Acetyl-1-pyrroline in Aromatic and Non-Aromatic Vegetable Soybeans
Source: MDPI journal article supplement (doi:10.3390/ijms232314529), 2022-11-22

**Figure S1. DAMs of ZX8 versus ZK1754.** (a) ZX8-S5 vs. ZK1754-S5 differential metabolite heatmap. (b) ZX8-S6 vs. ZK1754-S6 differential metabolite heatmap. Each sample is represented by a column, each metabolite by a row, and the content of each metabolite is represented by a bar with a specific color, with up- and down-regulated metabolites represented by different degrees of red and green, respectively. Three biological replicates were used for metabolite profiling.

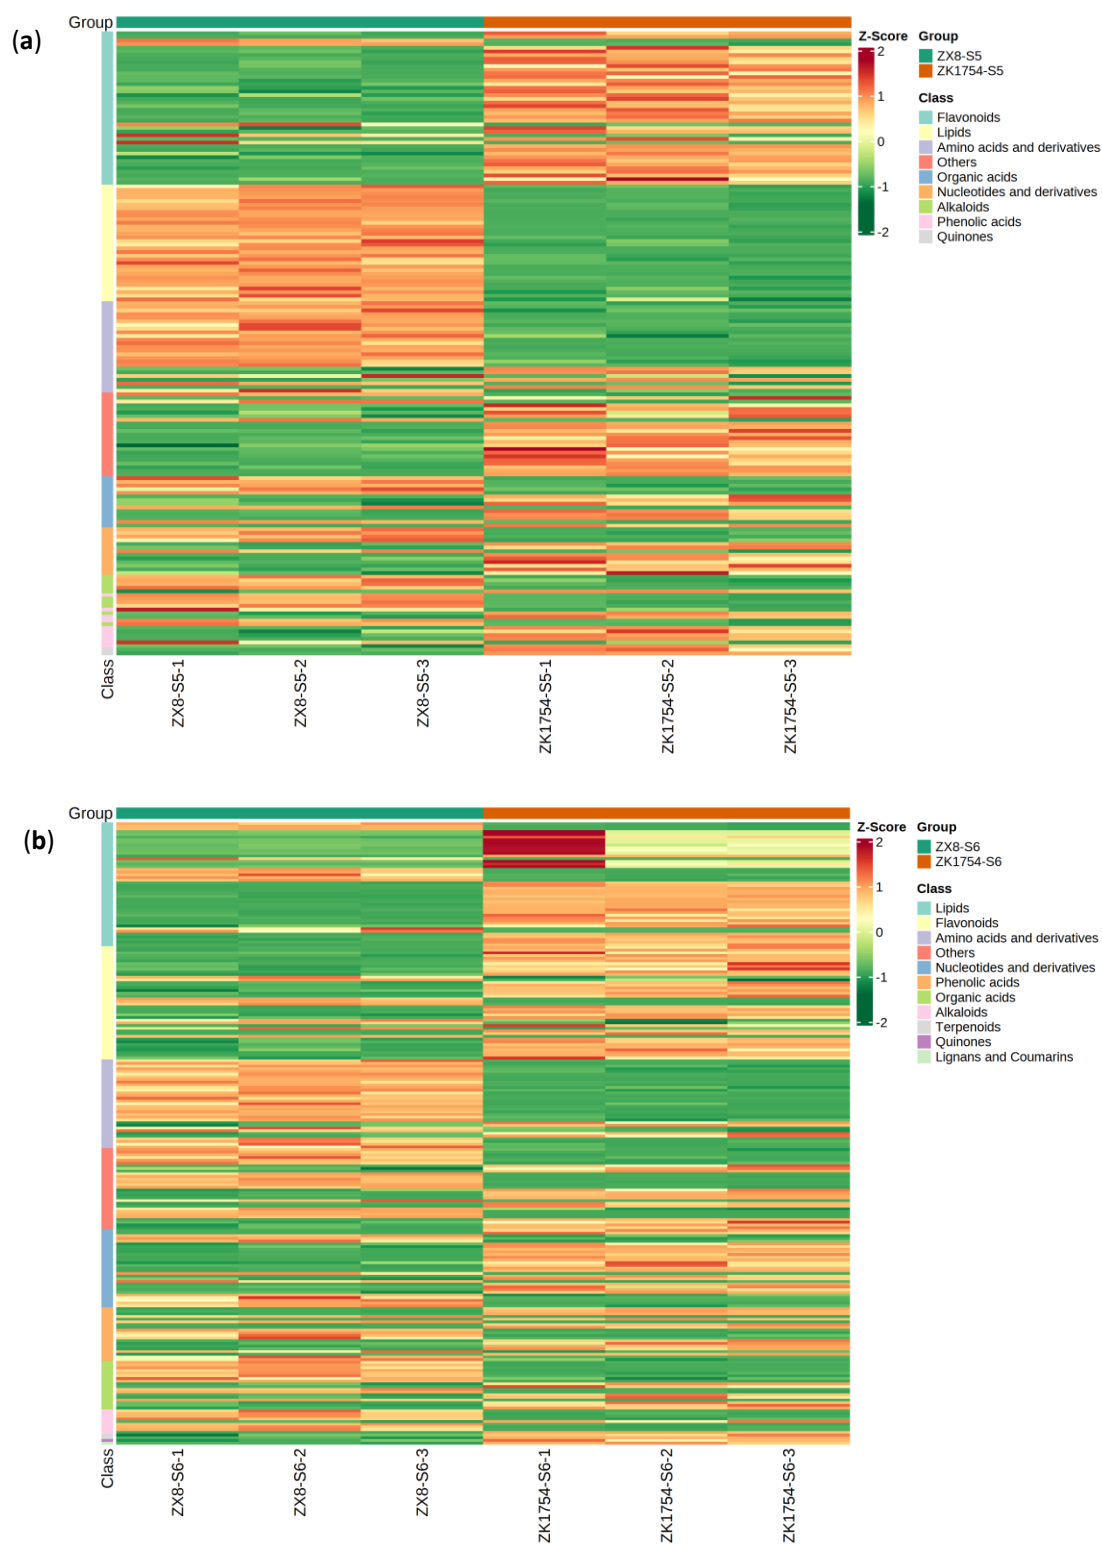

Supplement: s1 [file s1]
