# Supplementary material for: Combined Metabolomic and Quantitative RT-PCR Analyses Revealed the Synthetic Differences of 2-Acetyl-1-pyrroline in Aromatic and Non-Aromatic Vegetable Soybeans
Source: MDPI journal article supplement (doi:10.3390/ijms232314529), 2022-11-22
Supplement: s1 [file s1]

**Table S11.** The primers used in this study

|                | Gene            | Primer (5' to3' )                                       | Product size (bp) |
|----------------|-----------------|---------------------------------------------------------|-------------------|
| <i>β-Actin</i> | Glyma.02G091900 | F:GCATTGCAGATTGTAACCCCTTT<br>R:CTCTCCTCACCTTCTGCAAATA   | 96                |
|                | Glyma.04G193400 | F:CACGCTTTTCTCTACAGTCATG<br>R: GTAATGAAAGGGTCGTAAACGG   | 135               |
|                | Glyma.04G193500 | F: CCTATTTACCTATCACTGCGGT<br>R: AGAAAGTGGTTGGAGTAGGAAG  | 97                |
| <i>GAPDH</i>   | Glyma.06G172600 | F: GGAGAAAGAAGCTTCCTACGAT<br>R: TTGATCTGCTATCGCCGATAAA  | 131               |
|                | Glyma.06G172700 | F: TAAATACGACAGTGTTACGGA<br>R: GACTCAACAATGATGTCAGCTC   | 159               |
|                | Glyma.18G009700 | F: GGTAGACGGCCTTATAGGTTTT<br>R: GACGTGGAAAACAAAATGTTGC  | 101               |
| <i>TPI</i>     | Glyma.13G336200 | F: GAGGCAGCTTTTGAATGAATCA<br>R: CTGTTCAAGAGTTTCCCCAATG  | 106               |
|                | Glyma.15G038100 | F: ATTGGAACAGGAAAGGTTGCTA<br>R: CTTACAGATGCAGCAACTTCAG  | 107               |
|                | Glyma.02G222400 | F: TATTGGTCAAACCTGTGCAAC<br>R: AAACACAAAGCCTCATTACAG    | 88                |
| <i>FBA</i>     | Glyma.12G037400 | F: AAAACACTGCCTTGAAGACATG<br>R: GTGTTGCTGCCTAACAAGTATC  | 213               |
|                | Glyma.14G189400 | F: ACTCCTGGAAAGGGTATTCTTG<br>R: GAGATATTTAAGAGCACCGGGA  | 147               |
|                | Glyma.17G075300 | F: GCTGTTTCTGCTCTTCATATGG<br>R: GATGCATTGTAAGGAAGTCACC  | 115               |
| <i>GPD</i>     | Glyma.05G199800 | F: CAGTTTGC GGTTTGTATAGAA<br>R: GTCATAGTAAGGGCTCTGTCTC  | 106               |
|                | Glyma.08G362900 | F: CGTCATGGTTAGTAATGCAGTG<br>R: AACGCACAACCATTGTATAGTG  | 199               |
|                | Glyma.18G299100 | F: GGAAATTGTCCGCTTCAAGTAA<br>R: GCATGTGTTGTGTCATCGATTA  | 157               |
| <i>P5CDH</i>   | Glyma.19G131500 | F: GCGCAAATCGAAATTGATTCTC<br>R: ATGAAGCCGAGAGTG TAGGATT | 85                |
|                | Glyma.13G049700 | F: GAATGTGGATGATGAAGTCGAG<br>R: GAGAAGAACGTCTCTTTCGTGG  | 85                |
| <i>PRODH</i>   | Glyma.19G043000 | F: CACAAACACCCTTTGAGTTCAT<br>R: GTTGCCATTAAACTCTCGGAAG  | 101               |
|                | Glyma.02G251100 | F: TAAAATAGCTGATGCCCTGGAA<br>R: GTTGCAATAATTCGCATGTTG   | 169               |
| <i>P5CS</i>    | Glyma.14G065600 | F: CCAGGCCATATCTTCAGAAGAA<br>R: TTTCATATCCTGCTTGTTGTGC  | 131               |
|                | Glyma.18G034300 | F: TTGCTAAAAATAGCTGATGCCC<br>R: GTTCGTTTTAACACTCGACCAA  | 209               |

|              |                 |                                                        |     |
|--------------|-----------------|--------------------------------------------------------|-----|
| <i>OAT</i>   | Glyma.05G141900 | F: TGATCGTTGTGGTAGAGTCTTG<br>R: TATTGGAGCATAGTTTCCAGGG | 137 |
|              | Glyma.08G097800 | F: GTTGCAGAAGACAAAGCCAATA<br>R: CACATGCAATTCATACGTGTCT | 109 |
| <i>P5CDH</i> | Glyma.05G029200 | F: ATCTTGCTGAGAGAAGAAAGCT<br>R: CAGCTTTGATCCTGGTATCTCA | 116 |
|              | Glyma.17G097800 | F: CAGGATCAAAGTTGCTATTCGG<br>R: TGACTGTTTTGATAGTCCGTGA | 187 |
| <i>BADH</i>  | Glyma06g19820   | F: TACATATCTGATGAACCGTGGG<br>R: GATAAAATCAACTCAGCCCGTC | 200 |
|              | Glyma05g01770   | F: TGAAGCGGGTGCTCCTTTAG<br>R: AATATGGTCCATTCAGCAGC     | 195 |

---
