# Supplementary material for: Combined Metabolomic and Quantitative RT-PCR Analyses Revealed the Synthetic Differences of 2-Acetyl-1-pyrroline in Aromatic and Non-Aromatic Vegetable Soybeans
Source: MDPI journal article supplement (doi:10.3390/ijms232314529), 2022-11-22

**Figure S2.** Relative expression levels of 2AP synthesis pathway related genes in soybean grain. Green column: ZX8 (non-aromatic soybeans), violet column: ZK1754 (aromatic soybeans). S1, S2, S3, S4, S5, S6 for soybean grains correspond to 15, 20, 25, 30, 35, 40 days after anthesis. \* Indicates significance at the  $p < 0.05$  level, \*\* indicates significance at the  $p < 0.01$  level.

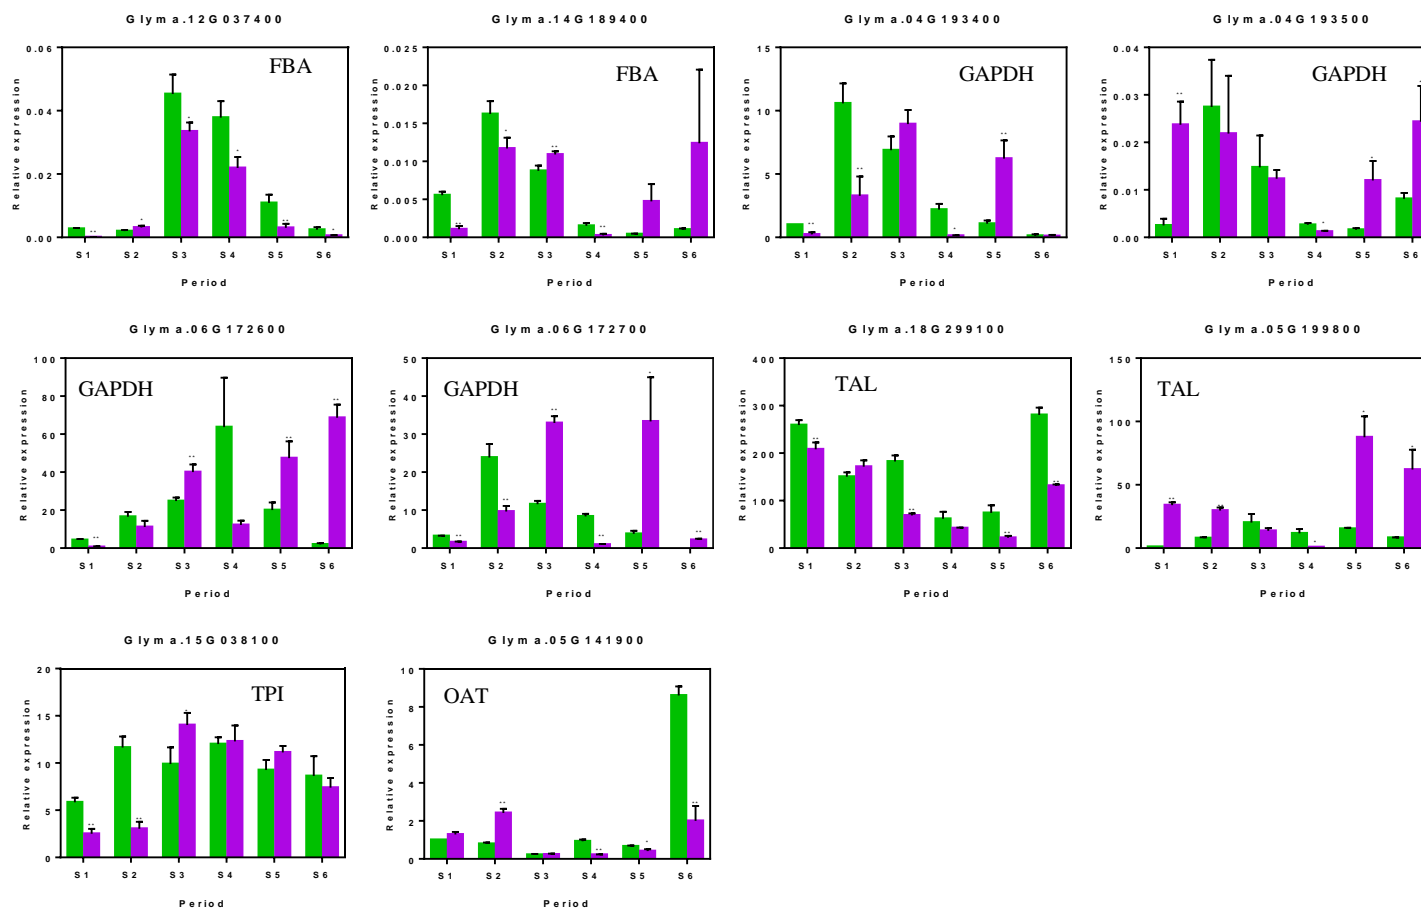

Supplement: s1 [file s1]
