# Supplementary material for: Combined Metabolomic and Quantitative RT-PCR Analyses Revealed the Synthetic Differences of 2-Acetyl-1-pyrroline in Aromatic and Non-Aromatic Vegetable Soybeans
Source: MDPI journal article supplement (doi:10.3390/ijms232314529), 2022-11-22
Supplement: s1 [file s1]

**Table S8.** The genes related to the synthesis of 2AP and their homologs in plants

| Gene  | Species                               | Homologous gene           |                           |                          |                  |  |
|-------|---------------------------------------|---------------------------|---------------------------|--------------------------|------------------|--|
| GAPDH | <i>Oryza sativa</i> L.                | LOC_Os04g40950.1          |                           |                          |                  |  |
|       |                                       | LOC_Os02g38920.1(94.7%)   | LOC_Os08g03290.1(94.4%)   |                          |                  |  |
|       |                                       | LOC_Os06g45590.1(82.8%)   | LOC_Os02g07490.1(82.5%)   |                          |                  |  |
|       |                                       | LOC_Os04g38600.1(65.6%)   | LOC_Os03g03720.1(67.4%)   |                          |                  |  |
|       |                                       | Aco003511.1(81.3%)        | Aco018596.1(81.0%)        | Aco004676.1(78.9%)       |                  |  |
|       | <i>Ananas comosus</i> (Linn.) Merr.   | Aco007469.1(64.7%)        | Aco011924.1(62.0%)        | Aco016173.1(24.6%)       |                  |  |
|       |                                       | Bol010398(93.5%)          | Bol031435(93.5%)          | Bol029171(93.2%)         |                  |  |
|       | <i>Brassica oleracea</i> L.           | Bol038208(82.5%)          | Bol021505(82.2%)          | Bol033485(68.2%)         |                  |  |
|       |                                       | Bol042826(65.3%)          | Bol031102(65.3%)          | Bol031393(65.6%)         |                  |  |
|       |                                       | Glyma.06G172700.1(93.8%)  | Glyma.04G193400.1(93.8%)  |                          |                  |  |
|       | <i>Glycine max</i> (Linn.) Merr.      | Glyma.06G172600.1(93.8%)  | Glyma.04G193500.1(93.5%)  |                          |                  |  |
|       |                                       | Glyma.18G009700.1(91.7%)  | Glyma.11G247600.1(91.7%)  |                          |                  |  |
|       |                                       | Glyma.19G078300.1(92.6%)  | Glyma.05G073100.1(93.2%)  |                          |                  |  |
|       |                                       | Glyma.03G092700.1(74.8%)  | Glyma.16G081400.1(75.1%)  |                          |                  |  |
|       |                                       | Glyma.19G106800.1(56.4%)  | Glyma.16G044900.1(56.4%)  |                          |                  |  |
|       |                                       | Glyma.06G015900.1(58.5%)  | Glyma.04G015900.1(58.5%)  |                          |                  |  |
|       |                                       | Glyma.16G150200.1(35.0%)  |                           |                          |                  |  |
|       |                                       | <i>Oryza sativa</i> L.    | LOC_Os01g62420.1          |                          |                  |  |
|       | LOC_Os01g05490.1(89.4%)               |                           | LOC_Os09g36450.1(70.6%)   |                          |                  |  |
|       | Aco015453.1(89.4%)                    |                           | Aco024987.1(84.3%)        | Aco013124.1(69.8%)       |                  |  |
|       | Aco020079.1(63.1%)                    |                           |                           |                          |                  |  |
|       | <i>Brassica oleracea</i> L.           |                           | Bol044218(90.6%)          | Bol044217(89.0%)         | Bol045882(71.4%) |  |
|       |                                       |                           | Bol006738(71.4%)          | Bol045407(54.5%)         | Bol045406(38.0%) |  |
|       | <i>Glycine max</i> (Linn.) Merr.      |                           | Glyma.15G038100.1(85.5%)  | Glyma.13G146200.1(71.8%) |                  |  |
|       |                                       |                           | Glyma.13G336200.1(68.2%)  | Glyma.03G185800.1(67.5%) |                  |  |
|       |                                       |                           | Glyma.19G186000.1(66.7%)  | Glyma.10G059500.1(67.1%) |                  |  |
| TPI   | <i>Lycopersicon esculentum</i> Miller |                           | Solyc09g009260            |                          |                  |  |
|       |                                       | Solyc10g083570.1.1(96.4%) | Solyc07g065900.2.1(87.7%) |                          |                  |  |
|       |                                       | Solyc05g008600.2.1(71.2%) | Solyc02g062340.2.1(70.9%) |                          |                  |  |
|       |                                       | Solyc01g110360.2.1(69.8%) | Solyc02g084440.2.1(70.4%) |                          |                  |  |
|       |                                       | Solyc10g054380.1.1(27.4%) | Solyc10g054390.1.1(22.3%) |                          |                  |  |
|       | Solyc10g054340.1.1(9.8%)              |                           |                           |                          |                  |  |
|       | <i>Oryza sativa</i> L.                | LOC_Os01g67860.1(91.3%)   | LOC_Os05g33380.1(90.8%)   |                          |                  |  |
|       |                                       | LOC_Os10g08022.1(90.2%)   | LOC_Os08g02700.1(86.9%)   |                          |                  |  |
|       |                                       | LOC_Os06g40640.1(86.3%)   | LOC_Os11g07020.1(70.7%)   |                          |                  |  |
|       |                                       | LOC_Os01g02880.1(70.4%)   |                           |                          |                  |  |
|       | <i>Ananas comosus</i> (Linn.) Merr.   | Aco025753.1(91.9%)        | Aco024201.1(91.9%)        | Aco007775.1(88.5%)       |                  |  |
|       |                                       | Aco003226.1(71.8%)        | Aco021826.1(71.5%)        | Aco007583.1(13.4%)       |                  |  |
|       | <i>Brassica oleracea</i> L.           | Bol010037(92.2%)          | Bol037713(91.6%)          | Bol004435(90.8%)         |                  |  |
|       |                                       | Bol025079(90.2%)          | Bol039645(87.7%)          | Bol037714(84.9%)         |                  |  |
|       |                                       | Bol045872(70.1%)          | Bol014852(71.2%)          | Bol018526(68.7%)         |                  |  |
|       |                                       | Bol028791(69.3%)          | Bol016047(68.2%)          | Bol006726(67.9%)         |                  |  |

|       |                                         |                          |                                                 |
|-------|-----------------------------------------|--------------------------|-------------------------------------------------|
|       | <i>Glycine max</i> (Linn.) Merr.        | Glyma.14G189400.1(92.2%) | Glyma.13G151800.1(91.9%)                        |
|       |                                         | Glyma.02G222400.1(91.6%) | Glyma.03G191500.1(91.6%)                        |
|       |                                         | Glyma.10G066700.1(91.6%) | Glyma.14G010900.1(88.5%)                        |
|       |                                         | Glyma.02G303000.1(88.0%) | Glyma.12G037400.1(71.2%)                        |
|       |                                         | Glyma.11G111400.1(71.5%) | Glyma.11G111100.1(71.5%)                        |
|       |                                         | Glyma.04G008300.1(70.7%) | Glyma.20G122500.1(70.7%)                        |
|       |                                         | Glyma.10G268500.1(70.7%) | Glyma.12G153000.1(68.4%)                        |
| TAL   | <i>Arabidopsis thaliana</i> (L.) Heynh. | At5g13420                |                                                 |
|       | <i>Oryza sativa</i> L.                  | LOC_Os01g70170.1(75.8%)  |                                                 |
|       | <i>Ananas comosus</i> (Linn.) Merr.     | Aco015068.1(79.7%)       |                                                 |
|       | <i>Brassica oleracea</i> L.             | Bol043436(95.0%)         | Bol034232(55.0%)                                |
|       | <i>Glycine max</i> (Linn.) Merr.        | Glyma.18G299100.1(86.8%) | Glyma.08G362900.1(86.5%)                        |
|       |                                         | Glyma.05G199800.1(66.9%) | Glyma.08G277700.1(53.7%)                        |
|       |                                         | Glyma.15G205300.1(53.7%) | Glyma.02G189100.1(52.3%)                        |
|       |                                         | Glyma.13G043400.1(52.7%) | Glyma.03G072600.1(52.5%)                        |
|       |                                         | Glyma.08G007300.1(35.6%) | Glyma.18G139200.1(21.5%)                        |
| PRODH | <i>Oryza sativa</i> L.                  | LOC_Os10g40360.1         |                                                 |
|       | <i>Ananas comosus</i> (Linn.) Merr.     | Aco012041.1(58.2%)       |                                                 |
|       | <i>Brassica oleracea</i> L.             | Bol040145(62.0%)         | Bol033129(60.6%)<br>Bol032297(61.2%)            |
|       | <i>Glycine max</i> (Linn.) Merr.        | Bol043056(60.0%)         |                                                 |
|       |                                         | Glyma.19G043000.1(56.9%) | Glyma.13G049700.1(56.5%)                        |
|       |                                         | Glyma.18G278900.1(56.3%) | Glyma.19G042900.1(56.3%)                        |
|       |                                         | Glyma.08G255900.1(51.0%) |                                                 |
| P5CS  | <i>Oryza sativa</i> L.                  | LOC_Os05g38150(P5CS1)    | LOC_Os01g62900(P5CS2)<br>LOC_Os01g73450.1(7.7%) |
|       | <i>Ananas comosus</i> (Linn.) Merr.     | Aco015423.1(80.0%)       | Aco014596.1 1(8.3%)                             |
|       | <i>Brassica oleracea</i> L.             | Bol016209(87.4%)         | Bol044229(86.9%)<br>Bol020440(86.6%)            |
|       | <i>Glycine max</i> (Linn.) Merr.        | Bol044364(84.9%)         |                                                 |
|       |                                         | Glyma.18G034300.1(88.0%) | Glyma.14G065600.1(87.3%)                        |
|       |                                         | Glyma.02G251100.1(87.2%) | Glyma.01G099800.1(86.2%)                        |
|       |                                         | Glyma.03G069400.1(84.8%) | Glyma.18G188000.1(80.3%)                        |
|       |                                         | Glyma.07G137300.1(80.0%) |                                                 |
| OAT   | <i>Oryza sativa</i> L.                  | LOC_Os03g44150.1         |                                                 |
|       |                                         | LOC_Os05g03830.1(42.3%)  | LOC_Os04g52440.1(44.4%)                         |
|       |                                         | LOC_Os08g10510.1(45.0%)  | LOC_Os04g52450.1(45.2%)                         |
|       |                                         | LOC_Os02g02210.1(44.6%)  | LOC_Os05g39770.1(45.0%)                         |
|       |                                         | LOC_Os03g21960.1(41.6%)  | LOC_Os03g07570.4(39.7%)                         |
|       |                                         | LOC_Os07g27780.1(26.8%)  | LOC_Os08g41990.1(32.6%)                         |
|       |                                         | LOC_Os08g14770.1(19.7%)  |                                                 |
|       | <i>Ananas comosus</i> (Linn.) Merr.     | Aco005104.1(83.3%)       | Aco001566.1(39.7%)<br>Aco007099.1(44.0%)        |
|       | <i>Brassica oleracea</i> L.             | Aco018682.1(41.9%)       |                                                 |
|       |                                         | Aco004116.1(36.8%)       |                                                 |
|       |                                         | Bol006334(80.8%)         | Bol032105(23.7%)<br>Bol023248(46.3%)            |
|       | <i>Glycine max</i> (Linn.) Merr.        | Glyma.05G141900.1(77.0%) | Glyma.08G097800.1(76.5%)                        |
|       |                                         | Glyma.08G245800.1(22.2%) | Glyma.17G184700.1(22.8%)                        |
|       |                                         | Glyma.19G189900.1(11.8%) | Glyma.02G189300.1(9.1%)                         |
|       |                                         | Glyma.15G181100.1(9.1%)  |                                                 |
