# Supplementary material for: Combined Metabolomic and Quantitative RT-PCR Analyses Revealed the Synthetic Differences of 2-Acetyl-1-pyrroline in Aromatic and Non-Aromatic Vegetable Soybeans
Source: MDPI journal article supplement (doi:10.3390/ijms232314529), 2022-11-22
Supplement: s1 [file s1]

**Table S10.** Candidate genes and homologous genes in the 2AP synthesis pathway in soybean

| <b>Gene</b>  | <b>Candidate gene</b> |                 |                 |                 |                 |
|--------------|-----------------------|-----------------|-----------------|-----------------|-----------------|
| <i>FBA</i>   |                       | Glyma.14G189400 | Glyma.02G222400 | Glyma.12G037400 |                 |
| <i>GAPDH</i> | Glyma.06G172700       | Glyma.04G193400 | Glyma.06G172600 | Glyma.04G193500 | Glyma.18G009700 |
| <i>GPD</i>   |                       | Glyma.17G075300 | Glyma.03G027500 |                 |                 |
| <i>TAL</i>   |                       | Glyma.18G299100 | Glyma.08G362900 | Glyma.05G199800 |                 |
| <i>TPI</i>   |                       | Glyma.15G038100 | Glyma.13G336200 |                 |                 |
| <i>OAT</i>   |                       | Glyma.05G141900 | Glyma.08G097800 |                 |                 |
| <i>P5CR</i>  |                       | Glyma.19G131500 |                 |                 |                 |
| <i>PRODH</i> |                       | Glyma.19G043000 | Glyma.13G049700 |                 |                 |
| <i>P5CS</i>  |                       | Glyma.18G034300 | Glyma.14G065600 | Glyma.02G251100 |                 |
| <i>P5CDH</i> |                       | Glyma.05G029200 | Glyma.17G097800 |                 |                 |
| <i>BADH</i>  |                       | Glyma05g01770   | Glyma06g19820   |                 |                 |
