# Supplementary material for: Combined Metabolomic and Quantitative RT-PCR Analyses Revealed the Synthetic Differences of 2-Acetyl-1-pyrroline in Aromatic and Non-Aromatic Vegetable Soybeans
Source: Int J Mol Sci. 2022 Nov 22;23(23):14529. doi: 10.3390/ijms232314529 (PMC9738111; doi:10.3390/ijms232314529)
Supplement: Supplementary file 1 [file ijms-23-14529-s001.zip]

Archive with 16 entries (16 files):
- ijms-1956011-supplementary/Figure S1.pdf
- ijms-1956011-supplementary/Figure S2.pdf
- ijms-1956011-supplementary/Figure S3.pdf
- ijms-1956011-supplementary/Figure S4.pdf
- ijms-1956011-supplementary/Figure S5.pdf
- ijms-1956011-supplementary/Table S1.xlsx
- ijms-1956011-supplementary/Table S10.pdf
- ijms-1956011-supplementary/Table S11.pdf
- ijms-1956011-supplementary/Table S2.xlsx
- ijms-1956011-supplementary/Table S3.xlsx
- ijms-1956011-supplementary/Table S4.xlsx
- ijms-1956011-supplementary/Table S5.xlsx
- ijms-1956011-supplementary/Table S6.xlsx
- ijms-1956011-supplementary/Table S7.xlsx
- ijms-1956011-supplementary/Table S8.pdf
- ijms-1956011-supplementary/Table S9.xlsx
