# Supplementary material for: Combined Metabolomic and Quantitative RT-PCR Analyses Revealed the Synthetic Differences of 2-Acetyl-1-pyrroline in Aromatic and Non-Aromatic Vegetable Soybeans
Source: Int J Mol Sci. 2022 Nov 22;23(23):14529. doi: 10.3390/ijms232314529 (PMC9738111; doi:10.3390/ijms232314529)
Supplement: Supplementary file 1 [file ijms-23-14529-s001.zip › ijms-1956011-supplementary/Table S1.xlsx]

## Sheet: Sheet1
Table S1 metabolites in ZX8 and ZK1754 (* indicates the racemates)
Compounds	Class	Class	ZX8-S5-1	ZX8-S5-2	ZX8-S5-3	ZX8-S6-1	ZX8-S6-2	ZX8-S6-3	ZK1754-S5-1	ZK1754-S5-2	ZK1754-S5-3	ZK1754-S6-1	ZK1754-S6-2	ZK1754-S6-3	mix01	mix02	mix03
N-Methylglycine	Amino acids and derivatives	Amino acids and derivatives	24685	25115	24033	11199	12349	17431	14729	7182.5	18746	9	9	9	20651	11663	10453
L-Alanine	Amino acids and derivatives	Amino acids and derivatives	12931	8255.9	13146	3059.4	3833.2	5697.7	9745.1	8654.1	5345.8	1308	2972.6	418.91	7782.4	5218	7312.5
L-Azetidine-2-carboxylic acid	Amino acids and derivatives	Amino acids and derivatives	1066600	1207100	1178900	835970	641080	764990	578520	611600	726030	548910	556070	592370	1220600	954160	849540
Methyl 3-aminopropanoate	Amino acids and derivatives	Amino acids and derivatives	14148000	15122000	13218000	10447000	11991000	12097000	12405000	11639000	11175000	10292000	9468400	9947400	12799000	11173000	10833000
N,N-Dimethylglycine	Amino acids and derivatives	Amino acids and derivatives	3297200	3352900	3432700	1945200	1897800	1942000	1926500	1883600	2047900	1258900	1165500	1199300	2208800	2158800	2070600
L-Serine	Amino acids and derivatives	Amino acids and derivatives	2389800	2420300	2490000	2130000	1917200	1997700	1435000	1590700	1703300	484180	514480	503540	2440300	1968100	1745900
L-Proline	Amino acids and derivatives	Amino acids and derivatives	28107000	27807000	31349000	17254000	17577000	18663000	11703000	9320500	10576000	13991000	13779000	13345000	20877000	17828000	18263000
L-Valine	Amino acids and derivatives	Amino acids and derivatives	55535000	57158000	57114000	38265000	37099000	37181000	27002000	27826000	23884000	23220000	23716000	23274000	35881000	33886000	31644000
L-Threonine*	Amino acids and derivatives	Amino acids and derivatives	1526800	1602900	1773200	1108400	1310400	1305100	863100	721960	1000900	614860	656030	551640	1531400	1356200	1152800
L-Homoserine*	Amino acids and derivatives	Amino acids and derivatives	1429100	1447100	1793200	1134500	1223400	1271200	623100	822240	803380	620760	689670	522210	1502300	1320400	1214800
Cyclo(Ala-Gly)	Amino acids and derivatives	Amino acids and derivatives	133670	154390	118670	136600	106600	165700	117810	112520	100080	155690	148170	135170	118720	128870	127030
Trans-4-Hydroxy-L-proline	Amino acids and derivatives	Amino acids and derivatives	248160	202680	218950	100140	196500	210300	268560	222350	240570	192090	188850	226610	212840	162720	220230
N-acetyl-beta-alanine	Amino acids and derivatives	Amino acids and derivatives	161660	161000	148440	174210	167500	158540	188420	206850	207250	221810	258950	250620	196320	188940	176010
L-Leucine*	Amino acids and derivatives	Amino acids and derivatives	23657000	22243000	23337000	13843000	13564000	12287000	7219000	7530800	6854500	7101100	6347100	6898200	10844000	11325000	8817200
L-Norleucine	Amino acids and derivatives	Amino acids and derivatives	1860200	1808400	1784400	1170800	1117800	1111400	591000	597210	553220	520340	435390	488440	919720	901600	812460
L-Isoleucine*	Amino acids and derivatives	Amino acids and derivatives	10343000	12137000	10807000	5363400	5712300	5568800	3382600	3352200	2353500	2723800	2315700	2302200	4385700	4614100	3835600
L-Asparagine	Amino acids and derivatives	Amino acids and derivatives	7046000	10970000	9543700	3853800	5493300	5572300	2740900	3118800	3386100	622040	670510	596540	6852200	5882400	5289800
L-Ornithine	Amino acids and derivatives	Amino acids and derivatives	68630	97953	75254	298700	339220	340120	20328	17197	16377	8188.3	11524	7422.3	78399	105080	127100
L-Aspartic Acid	Amino acids and derivatives	Amino acids and derivatives	18049000	18918000	17776000	13201000	12942000	12799000	9560000	9834000	9465500	2789700	2729600	2834900	10504000	10192000	10789000
S-Methyl-L-cysteine	Amino acids and derivatives	Amino acids and derivatives	1348300	1192600	1314500	537890	494630	439600	359480	229810	250920	227220	226390	219260	512570	450310	364610
L-Cyclopentylglycine	Amino acids and derivatives	Amino acids and derivatives	246550	291110	316120	141010	149980	123810	173930	103600	142940	210900	229930	253120	177340	208980	215550
N-Methyl-Trans-4-Hydroxy-L-Proline	Amino acids and derivatives	Amino acids and derivatives	139110	157740	168020	204950	215220	220370	278980	191230	261030	346730	267910	290970	284230	236970	202110
L-Glutamine	Amino acids and derivatives	Amino acids and derivatives	3613900	3021100	3526100	2950900	3305700	3042300	1843600	1702900	1706400	2606500	2375000	2460800	2391100	2047500	2214600
L-Lysine	Amino acids and derivatives	Amino acids and derivatives	3546900	3057600	3011700	2374300	3517300	2797000	1608400	1610000	1649000	2544900	2366700	2268000	2538300	2432300	1969000
L-Glutamic acid	Amino acids and derivatives	Amino acids and derivatives	55257000	56347000	53906000	29494000	29578000	33917000	30956000	27296000	37641000	15713000	16713000	17221000	58554000	43658000	40278000
O-Acetylserine	Amino acids and derivatives	Amino acids and derivatives	259720	302560	359750	277330	290150	233000	304210	268960	370250	182140	131950	204520	296190	246570	229140
L-threo-3-Methylaspartate	Amino acids and derivatives	Amino acids and derivatives	4930300	4655400	4523200	1727800	1784600	1750200	1305600	1392000	1305100	492230	448140	459350	1824300	1911700	2078900
(2S,3R,4S)-4-Hydroxyisoleucine	Amino acids and derivatives	Amino acids and derivatives	687500	640350	685130	383980	477920	459100	439750	442800	362310	114900	160440	92642	550850	372810	341470
4-Hydoxy-L-Isoleucine	Amino acids and derivatives	Amino acids and derivatives	632480	601350	599490	380660	511970	521630	434170	317810	342220	161670	115560	157960	545460	437070	460120
L-Methionine	Amino acids and derivatives	Amino acids and derivatives	15554000	14883000	11767000	8995200	10435000	7509100	3766100	3773200	4036100	1949300	2376400	2007400	6645800	5923100	6692100
L-Histidine	Amino acids and derivatives	Amino acids and derivatives	69619000	84778000	96150000	90601000	89656000	84771000	47376000	55410000	53974000	18830000	18447000	18264000	71712000	62992000	61984000
L-Alanyl-L-Alanine	Amino acids and derivatives	Amino acids and derivatives	15151	17891	18631	16825	11261	17285	31054	27974	36962	12098	12020	11943	14763	18807	29242
N-Methyl-L-Glutamate	Amino acids and derivatives	Amino acids and derivatives	60374	56604	57777	21298	14140	15870	5520.4	7353.8	6290.6	9	9	9	18682	12391	23714
N-Acetyl-L-threonine	Amino acids and derivatives	Amino acids and derivatives	51189	18879	41039	47259	38657	34850	22598	34311	27214	55025	61873	61037	36142	30219	25480
3-Hydroxy-3-methylpentane-1,5-dioic acid	Amino acids and derivatives	Amino acids and derivatives	1718200	1653700	1851600	1712400	1667200	1521200	1864700	1799100	1599700	2703700	2849600	2908400	1648000	1545100	1716400
L-Methionine methyl ester	Amino acids and derivatives	Amino acids and derivatives	72910	102770	83633	56569	58525	56537	74374	57059	59813	9	9	9	62264	51752	50201
L-Methionine Sulfoxide	Amino acids and derivatives	Amino acids and derivatives	3098600	3161000	3180900	2791700	2960100	2814800	3203100	3238200	3192700	2771300	2992400	2970100	3037000	2874900	2889200
L-Phenylalanine	Amino acids and derivatives	Amino acids and derivatives	4669600	3734500	3321100	2689000	2667300	2416900	2905100	2799900	2004300	2831700	2495100	2701600	2681200	2351400	3055000
3-Methyl-L-Histidine	Amino acids and derivatives	Amino acids and derivatives	87171	34249	47748	55546	40092	68847	42293	80435	55358	67633	61925	69771	72870	59557	42903
1-Methylhistidine	Amino acids and derivatives	Amino acids and derivatives	59783	62634	80637	48609	63671	25268	99339	75130	56228	25870	30741	9	42907	41677	39790
L-Glycyl-L-proline	Amino acids and derivatives	Amino acids and derivatives	177290	112180	143450	99635	144480	117800	148100	97381	115160	48994	59669	48344	131500	125040	80285
N-Alpha-Acetyl-L-Asparagine	Amino acids and derivatives	Amino acids and derivatives	18496	20218	38290	12167	30469	6761.1	31414	26847	19373	36133	31132	22047	32861	21572	33274
N-α-Acetyl-L-ornithine	Amino acids and derivatives	Amino acids and derivatives	1690500	1677300	1601200	3437800	3554000	3692800	417460	400350	412550	416480	388450	361230	1582200	1729400	1763200
L-Arginine	Amino acids and derivatives	Amino acids and derivatives	7359200	7652000	8473700	12875000	13638000	13111000	3079100	2734800	2765800	3106500	2632400	2782200	7078300	6634200	6548300
N-Acetyl-L-Aspartic Acid	Amino acids and derivatives	Amino acids and derivatives	41312	85271	62507	77971	59512	57297	65284	64225	49297	85387	122000	120930	89150	81085	61541
L-Tyrosine	Amino acids and derivatives	Amino acids and derivatives	27643000	27124000	26770000	11768000	11658000	9138100	6858600	7074900	5750900	4622900	6135200	5606300	11560000	11908000	11465000
N-Acetyl-L-Glutamine	Amino acids and derivatives	Amino acids and derivatives	983050	882220	879900	772620	878430	782040	475130	447390	463910	572460	552580	520190	703470	660740	679560
N-Glycyl-L-leucine*	Amino acids and derivatives	Amino acids and derivatives	197860	153650	115400	285870	420690	374040	236640	244890	187150	283370	331500	422830	262990	224150	290480
L-Glycyl-L-isoleucine*	Amino acids and derivatives	Amino acids and derivatives	297760	314600	315540	705720	616910	598990	323150	317160	354510	911790	927660	978640	406360	432220	555260
N6-Acetyl-L-lysine	Amino acids and derivatives	Amino acids and derivatives	215650	248430	234350	144920	240330	210460	365990	320920	353110	365340	307370	345790	240190	210820	208120
Homoarginine	Amino acids and derivatives	Amino acids and derivatives	515360	503770	437310	746330	707480	669360	239970	157790	149820	138530	144460	158560	352420	343250	303930
N-Monomethyl-L-arginine	Amino acids and derivatives	Amino acids and derivatives	2213300	2311100	1834200	2699800	2821600	2911900	828370	825730	678770	771060	613810	674000	1405700	1215200	1426700
Trimethyllysine	Amino acids and derivatives	Amino acids and derivatives	1193000	1140200	1226500	1203500	1155300	1113000	939410	991800	874980	634920	825050	728710	993340	861420	833870
N-Acetyl-L-glutamic acid	Amino acids and derivatives	Amino acids and derivatives	283470	270500	252460	144750	156150	147460	136440	166140	193130	105830	91416	70449	197270	163840	166320
N-Acetyl-L-Methionine	Amino acids and derivatives	Amino acids and derivatives	33307	31342	39430	52378	55688	45820	56164	59324	53066	11334	6905.1	5502.1	33483	19063	32113
L-Tyrosine methyl ester	Amino acids and derivatives	Amino acids and derivatives	28949	43384	33469	27779	32165	32940	27098	37080	26178	13465	11020	14396	24928	27289	23290
NG,NG-Dimethyl-L-arginine	Amino acids and derivatives	Amino acids and derivatives	105900	124820	120320	167380	175890	180930	101430	93777	85434	179580	177940	190940	153130	140030	149180
N,N'-Dimethylarginine;SDMA	Amino acids and derivatives	Amino acids and derivatives	137480	156720	164660	226220	213720	228140	131730	104730	111520	217870	197370	237240	175090	155820	166400
L-Tryptophan	Amino acids and derivatives	Amino acids and derivatives	17038000	16716000	17121000	27338000	29792000	25690000	29157000	30316000	27978000	27713000	28762000	29113000	23607000	24843000	23906000
N-Acetyl-L-phenylalanine	Amino acids and derivatives	Amino acids and derivatives	245290	231150	244450	269890	297570	258290	173970	161900	158180	225070	251090	231250	221220	168170	187160
Methyldopa	Amino acids and derivatives	Amino acids and derivatives	17945	41549	24961	40937	30344	26873	19657	39132	28145	21202	15764	34235	33073	19643	26171
N-Acetyl-L-Arginine	Amino acids and derivatives	Amino acids and derivatives	25006	30594	31884	44286	49092	42498	20388	23734	32312	18607	25141	33588	40691	22072	24616
5-L-Glutamyl-L-amino acid	Amino acids and derivatives	Amino acids and derivatives	7536.9	16210	15970	22419	17774	11395	13823	14750	11474	22615	18091	21940	17940	17128	10157
5-Hydroxy-L-tryptophan	Amino acids and derivatives	Amino acids and derivatives	53359	54854	38814	53772	73234	41617	105190	102250	96118	113040	108970	95332	67945	81512	69324
L-Glycyl-L-phenylalanine	Amino acids and derivatives	Amino acids and derivatives	446720	437650	521520	516590	423910	542740	1474800	1552100	1272900	558160	588380	775110	622700	635110	431700
Glycylphenylalanine	Amino acids and derivatives	Amino acids and derivatives	107120	54952	53760	161750	212170	255230	51365	61385	45237	701210	450900	649590	163160	192100	317400
N-Acetyl-L-tyrosine	Amino acids and derivatives	Amino acids and derivatives	13506	10467	18227	21192	8730.8	10573	6020.6	8989.6	4334.4	7140.6	5184.8	5725.9	10417	8506.4	9865.1
L-Valyl-L-Leucine	Amino acids and derivatives	Amino acids and derivatives	73401	84822	95030	78699	67966	62632	48623	56972	37349	114640	114380	97483	73878	79373	76416
Cyclo(Tyr-Ala)	Amino acids and derivatives	Amino acids and derivatives	8024.8	8989	8616.1	10156	10846	8640.4	8078.1	6165.4	11820	14462	12275	8408.8	6686.4	7796.7	10739
L-Lysine-Butanoic Acid	Amino acids and derivatives	Amino acids and derivatives	52255	39466	46673	23464	30433	26902	23770	21939	35914	34639	37442	37145	35284	33519	28346
L-Alanyl-L-Phenylalanine	Amino acids and derivatives	Amino acids and derivatives	40134	23136	26621	9544.4	28152	34912	22533	22498	18396	99942	115920	100270	45498	36143	26278
L-Leucyl-L-Leucine	Amino acids and derivatives	Amino acids and derivatives	108280	122000	101830	80239	124400	90621	56018	71140	67889	40080	27432	21043	62284	106770	50338
N-Acetyl-L-Tryptophan	Amino acids and derivatives	Amino acids and derivatives	1233200	1186900	1368000	2032400	2073000	2124100	1104400	1212400	1122900	1488800	1400500	1522000	1333400	1153800	1189500
N-(3-Indolylacetyl)-L-alanine	Amino acids and derivatives	Amino acids and derivatives	37430	32476	30119	24715	34360	42046	39778	35652	29893	55847	43838	59497	21868	24179	17973
L-Isoleucyl-L-Aspartate	Amino acids and derivatives	Amino acids and derivatives	164170	207520	243370	222550	182330	191630	211610	166370	226820	103110	92985	76782	123660	174100	140810
γ-Glutamyl-L-valine	Amino acids and derivatives	Amino acids and derivatives	76777	76514	81124	149800	136710	119500	47521	49457	42482	162110	133520	124810	86215	82662	71319
L-γ-Glutamyl-L-leucine	Amino acids and derivatives	Amino acids and derivatives	206850	155390	144660	1517100	1796900	1687000	285720	308460	254270	1139700	1159200	1165400	688650	731040	720670
Glycyl-tryptophan	Amino acids and derivatives	Amino acids and derivatives	614820	620280	801820	962830	1022900	987270	1622900	1713200	1641700	1477500	1305700	1346800	972260	843050	1304700
L-Prolyl-L-Phenylalanine	Amino acids and derivatives	Amino acids and derivatives	37293	25017	21164	29714	49670	25576	26340	29094	20455	56333	44880	61864	33459	29661	38251
L-Valyl-L-Phenylalanine	Amino acids and derivatives	Amino acids and derivatives	19657	23832	17873	17654	25981	30135	14705	14115	13953	68141	86705	105710	30507	41620	39819
L-Homocystine	Amino acids and derivatives	Amino acids and derivatives	6331.6	10095	17123	34041	36200	45212	6561	10008	9759.9	141380	102530	156030	50346	43571	44262
γ-glutamylmethionine	Amino acids and derivatives	Amino acids and derivatives	202920	184480	175260	584930	752440	605830	88061	96055	76304	139740	122150	122830	195410	205750	192500
L-Leucyl-L-phenylalanine	Amino acids and derivatives	Amino acids and derivatives	107880	109750	51041	97866	106370	86220	58332	57960	48958	34596	35801	40398	72230	45219	56713
L-Aspartyl-L-Phenylalanine	Amino acids and derivatives	Amino acids and derivatives	107050	91914	96865	145220	156030	142340	91846	100490	101480	70901	84476	81468	79494	99808	119950
γ-Glutamylphenylalanine	Amino acids and derivatives	Amino acids and derivatives	2053900	2239100	1790500	25748000	27700000	26261000	10153000	9882400	8594200	35122000	37551000	37005000	18772000	17009000	19536000
γ-Glutamyltyrosine	Amino acids and derivatives	Amino acids and derivatives	373160	432110	363780	2035000	2234400	2290600	606040	534870	462220	1574800	1598700	1610400	996250	1049300	969280
S-(Methyl)glutathione	Amino acids and derivatives	Amino acids and derivatives	10683000	10054000	8998600	10903000	11357000	12628000	9316300	9517000	8400000	12213000	12211000	13034000	8294600	8047300	9818100
Tryptophan glutamic acid	Amino acids and derivatives	Amino acids and derivatives	26167	40816	29703	36550	58911	47925	9245.7	14517	10483	12171	8410.3	9940.6	24967	24920	25340
S-Adenosyl-L-methionine	Amino acids and derivatives	Amino acids and derivatives	338700	324860	281560	233620	161660	288550	206070	157180	146180	31869	18679	21167	187710	194280	207320
4-Hydroxybenzaldehyde	Phenolic acids	Phenolic acids	119940	78918	146330	101680	131700	130930	123890	122530	100900	154430	202020	223190	116830	101680	116940
2,5-Dihydroxybenzaldehyde*	Phenolic acids	Phenolic acids	162300	177430	130320	113920	151460	155310	151560	111130	137360	974880	1113400	1104900	329250	345510	334330
4-Hydroxybenzoic acid	Phenolic acids	Phenolic acids	354490	317850	306550	333930	308020	241020	256960	246830	290990	2149000	2343300	2163500	690250	615400	687780
Protocatechualdehyde*	Phenolic acids	Phenolic acids	206200	206610	187020	142920	202030	190610	133300	135330	113320	1459400	1468100	1409500	393540	462950	475320
4-Nitrophenol	Phenolic acids	Phenolic acids	14417000	10295000	17297000	11125000	14482000	14253000	13746000	12433000	11246000	12653000	12705000	12960000	16442000	10646000	15600000
Phthalic anhydride	Phenolic acids	Phenolic acids	14166000	12766000	13036000	12580000	12408000	11515000	13026000	13365000	12417000	12164000	11484000	10977000	13476000	11901000	11490000
Cinnamic acid	Phenolic acids	Phenolic acids	3092400	2829000	3063100	704660	776510	875970	1491800	1456200	1353500	128250	107430	112790	1216000	1049300	1140300
3-Hydroxycinnamic Acid	Phenolic acids	Phenolic acids	164770	242850	168680	48589	56858	43039	163840	127910	168730	110820	96818	89125	127330	101430	102860
2-Hydroxycinnamic acid	Phenolic acids	Phenolic acids	199850	267300	228610	77327	117890	80075	208610	176620	176340	118540	121970	105020	140710	138720	156910
2-(Formylamino)benzoic acid	Phenolic acids	Phenolic acids	23544	40884	34471	12603	17219	11479	28606	27578	23415	10889	16819	20649	31222	22642	13090
Phthalic acid	Phenolic acids	Phenolic acids	60542	62938	50476	61875	70106	59463	61716	49170	49030	71382	69451	75691	50228	53143	43791
Terephthalic acid	Phenolic acids	Phenolic acids	465720	724790	786520	883170	855150	771250	545770	615090	608580	751750	785660	645870	548050	569030	586300
1-(4-Methoxyphenyl)-1-propanol	Phenolic acids	Phenolic acids	42924	60029	63497	72662	56503	52194	58139	67083	112400	52846	44989	53585	47448	50498	42143
Vanillic acid	Phenolic acids	Phenolic acids	9	9	9	9	9	9	9	9	9	106930	129870	109380	26187	20754	28190
3,4-Dihydroxybenzeneacetic acid	Phenolic acids	Phenolic acids	79503	64736	69680	20933	24034	25572	93208	99190	97158	9	9	9	40029	37400	42394
Homogentisic acid	Phenolic acids	Phenolic acids	60601	65663	70624	25967	21507	23281	97351	95802	79626	23608	23559	18073	45405	41143	40380
4-Methoxycinnamic acid	Phenolic acids	Phenolic acids	7194.2	7329.8	7190.7	3274.1	3164.9	3191	14166	15100	11338	2181.7	2784.8	1873.6	6289.6	5483.2	5375.5
Trans-4-Hydroxycinnamic Acid Methyl Ester	Phenolic acids	Phenolic acids	11518	11136	13566	8563.5	7223	11315	19312	19248	18759	5891.5	5573.1	5003	10494	10989	9071.2
Hydroxyphenyllactic acid	Phenolic acids	Phenolic acids	23575	15219	15666	12867	9737.3	11917	6753.8	9834	6850	8597.5	6559.6	9	9938.7	9653.1	8765.9
Dimethyl phthalate	Phenolic acids	Phenolic acids	155900	116730	77162	120020	129730	130550	153010	144810	108580	105810	97821	113590	104640	103850	105080
Methyl caffeate	Phenolic acids	Phenolic acids	29755	31576	20331	24932	22845	24738	113920	100470	93485	69353	73095	81061	37558	47658	53795
Ferulic acid*	Phenolic acids	Phenolic acids	87868	67484	95526	54368	36084	40051	114240	84726	93662	67357	88618	71275	82358	61918	65870
Isoferulic Acid*	Phenolic acids	Phenolic acids	72841	80496	70418	31719	47155	37777	73740	96769	90340	61686	45642	68092	36250	79412	53007
Methyl 3-O-Methyl Gallate	Phenolic acids	Phenolic acids	152760	145330	123430	156340	145540	146520	155000	139750	128650	157050	156330	155820	107620	100670	141450
Syringic acid	Phenolic acids	Phenolic acids	9	9	9	9	9	9	9	9	9	38727	30263	35644	15156	19782	19655
2,4-Di-Tert-Butylphenol*	Phenolic acids	Phenolic acids	345370	322990	373280	364180	365580	367140	366240	370590	355320	336860	330990	338410	343230	333750	335800
2,6-Di-tert-butylphenol*	Phenolic acids	Phenolic acids	384690	385260	403020	394080	424340	401740	436740	430320	391950	396820	355170	389130	412040	367730	396580
3,4'-Dihydroxy-3',5'-dimethoxypropiophenone	Phenolic acids	Phenolic acids	18757	14708	20126	12436	19186	12384	24506	19573	11248	18118	18342	15021	14286	10314	20148
Benzoylmalic acid	Phenolic acids	Phenolic acids	4003900	3969700	3861200	3780700	4465000	4115400	4606400	4488400	4096100	3350500	3942200	3842600	3372100	3288900	3239000
Mucic acid Dimethyl Ester	Phenolic acids	Phenolic acids	581630	562440	580940	603830	596530	635830	497530	495520	491220	550330	530830	520710	518570	553040	552500
3,4'-Dihydroxy-3'-methoxybenzenepentanoic acid	Phenolic acids	Phenolic acids	25887	27730	33025	12587	20664	32506	19874	25491	33565	13932	19927	21325	25042	22483	17821
Butyl isobutyl phthalate	Phenolic acids	Phenolic acids	10735000	11148000	11344000	10738000	10652000	10891000	11017000	11022000	10838000	10690000	11151000	10791000	10838000	10833000	10426000
Dibutyl phthalate*	Phenolic acids	Phenolic acids	13133000	13954000	13516000	12593000	13963000	13097000	13282000	13557000	13411000	13381000	13603000	12783000	12974000	13061000	11633000
Diisobutyl phthalate*	Phenolic acids	Phenolic acids	13365000	13200000	13674000	13307000	14199000	14075000	13953000	14311000	14109000	13676000	13834000	13419000	13750000	12852000	13779000
1-O-Salicyl-D-glucose	Phenolic acids	Phenolic acids	310220	275530	302000	562470	522420	506740	121360	124770	98982	97252	94511	124610	234890	265400	237080
Salicylic acid-2-O-glucoside	Phenolic acids	Phenolic acids	2241400	2313000	2555800	2283700	2586900	2535700	1754600	1796100	1690900	1149700	1084300	1016700	1672200	1668800	1594400
4-O-Glucosyl-3,4-dihydroxybenzyl alcohol	Phenolic acids	Phenolic acids	12713	8277.9	10898	10600	14187	12247	7013.8	7352.3	6210.3	5192.2	5196.1	6239.3	13828	8417.1	8216.6
2-Acetyl-3-hydroxyphenyl-1-O-glucoside	Phenolic acids	Phenolic acids	12529	25766	18460	20541	21835	16816	19159	23785	16471	23819	15405	17689	16445	15751	16724
Methyl salicylate-2-O-glucoside	Phenolic acids	Phenolic acids	40158	40917	38258	42129	53686	55392	74315	75414	73717	86888	95668	96653	61820	59300	61129
Mandelic acid-β-glucoside	Phenolic acids	Phenolic acids	10366	13021	9312.5	8657.8	9063	12925	13619	12881	9608.7	15331	20781	24288	15374	17508	13341
Protocatechuic acid-4-O-glucoside*	Phenolic acids	Phenolic acids	241240	191740	234600	220030	259260	261720	270850	263590	199680	206420	207270	227070	187830	208900	212610
1-O-Gentisoyl-D-glucoside*	Phenolic acids	Phenolic acids	287930	235830	249260	255750	285440	237290	319880	285010	259750	273280	272620	236780	255230	189500	236240
Vanilloloside	Phenolic acids	Phenolic acids	322460	319280	269470	311530	336840	363140	357130	271690	285270	303410	293560	312980	247130	266330	274570
Trans-5-O-(p-Coumaroyl)shikimate	Phenolic acids	Phenolic acids	139970	84279	123040	51498	80475	42039	67158	64704	54927	9	9	9	64929	59586	66870
p-Coumaric acid-4-O-glucoside	Phenolic acids	Phenolic acids	143330	128100	134710	103040	92140	90802	113130	95671	90262	94267	95382	105100	99039	116860	92234
Ferulic acid-1-O-glucoside	Phenolic acids	Phenolic acids	93713	135470	123030	108700	105670	97254	99082	102870	95705	118100	103600	92621	96686	98789	74619
1-O-p-Cumaroyl-β-D-glucose	Phenolic acids	Phenolic acids	300390	299920	331880	249890	215250	198140	265390	253380	185980	238140	200420	273370	194230	218570	213500
1-O-Vanilloyl-D-Glucose	Phenolic acids	Phenolic acids	300840	306600	262070	356440	355110	338520	729550	719470	654750	665870	687950	769590	414920	407240	421040
Vanillic acid-4-O-glucoside	Phenolic acids	Phenolic acids	7805.7	5260.5	13883	12574	15372	15832	20859	28761	20016	23445	37158	34613	14260	19380	12743
2,4,6-trihydroxy-acetophenone-4-O-β-D-glucopyranoside	Phenolic acids	Phenolic acids	1086000	972200	1214900	1135400	1113200	1231100	2820400	2656500	2538100	2633800	2484100	2651600	1439200	1504000	1810900
3,4,5-Trimethoxyphenyl-1-O-Glucoside	Phenolic acids	Phenolic acids	3039600	3095400	3031200	3306100	3868100	3404100	8634700	8482600	7704600	8461500	7266900	8111300	4801500	4995300	5306000
Gallic acid-4-O-glucoside	Phenolic acids	Phenolic acids	18432	25446	23371	38997	44200	38292	27726	32062	28363	22287	33863	30407	21332	31030	35070
2-(3,4-dihydroxyphenyl)ethanediol 1-O-β-D-glucopyranoside	Phenolic acids	Phenolic acids	35620	32980	26494	27716	33477	28111	22818	21778	23635	30901	23190	30758	27167	21327	19240
5-O-Caffeoylshikimic acid	Phenolic acids	Phenolic acids	87439	57924	76571	34803	29448	39892	96202	103620	82400	11603	14391	15483	49459	38726	50071
1-O-Caffeoyl-β-D-glucose	Phenolic acids	Phenolic acids	175790	115650	163540	116860	130900	96489	251340	287610	318970	158200	251730	258880	193760	168770	180400
6-O-Caffeoyl-D-glucose	Phenolic acids	Phenolic acids	170750	151320	145410	84800	95081	98861	316220	297970	268780	204300	202020	212770	169720	157800	160890
Coniferin	Phenolic acids	Phenolic acids	181580	195630	169670	119830	110990	109860	364400	300300	267950	225790	198260	222710	128620	137640	187840
1-O-Feruloyl-D-Glucose	Phenolic acids	Phenolic acids	110730	130490	123510	96337	88879	80801	84310	82675	95720	97751	94282	91868	93996	105540	98646
6-O-Feruloyl-D-glucose	Phenolic acids	Phenolic acids	134310	102330	94738	139760	92236	82397	86902	104320	91894	121760	99368	99415	89731	92287	66600
Rosmarinic acid	Phenolic acids	Phenolic acids	24976	18601	29708	33267	71346	53077	18467	17176	11233	9	9	9	25588	15245	25707
Glucosyringic Acid	Phenolic acids	Phenolic acids	432240	374520	385620	432390	448960	487930	449510	498140	414160	498530	400780	568660	373450	421240	372520
Gallein	Phenolic acids	Phenolic acids	42029	40873	39799	17252	15489	20410	28654	32147	25968	17983	17705	23581	22292	23040	23624
1-O-Feruloylquinic acid	Phenolic acids	Phenolic acids	145510	119740	60001	147420	200870	119880	103720	114440	100950	126150	202560	135060	126560	181990	113990
4-O-Glucosyl-sinapate	Phenolic acids	Phenolic acids	68309	46890	55555	32438	40453	36176	25359	33423	24417	32934	31801	29471	33405	39907	34746
1-O-Sinapoyl-D-glucose	Phenolic acids	Phenolic acids	42356	43888	49460	25250	36959	38504	31580	27668	37447	25254	36621	40431	41302	27902	23321
Mucic acid-dimethyl-2-O-gallate	Phenolic acids	Phenolic acids	52563	53025	30761	67701	62353	48770	54160	58785	43381	39670	35862	39892	50016	65212	41937
Hydrangeifolin I	Phenolic acids	Phenolic acids	42153	42291	29579	60179	59872	47953	84360	84131	75696	65781	73988	67040	61177	40974	37532
6-O-Caffeoylarbutin	Phenolic acids	Phenolic acids	4889700	5232900	3527400	5104500	5658200	4997200	3336100	3406700	3237400	3576800	2680300	3035500	3434700	3670300	3559000
Anthranilate-1-O-Sophoroside	Phenolic acids	Phenolic acids	2970700	2399400	2274100	3705800	3255000	3895800	2066500	2160500	2031800	2092000	1864600	1873500	3053500	3139000	2703300
Anisic acid-O-feruloyl glucoside	Phenolic acids	Phenolic acids	35821	17814	35081	27972	53939	26338	31999	30869	18056	36683	32840	32904	14888	18653	25009
Rosmarinic acid-3'-O-glucoside	Phenolic acids	Phenolic acids	63615	50752	76143	66456	93535	89292	52410	56408	37492	84755	80180	85520	78461	66475	81753
β-Oxoacteoside	Phenolic acids	Phenolic acids	27180	23950	12507	26878	38317	40183	26078	28231	11536	18642	11302	13488	15891	11737	19017
Isocytosine	Nucleotides and derivatives	Nucleotides and derivatives	229060	199680	237160	251850	236050	272420	277630	276050	249100	255790	205660	215070	325310	252490	184870
Cytosine	Nucleotides and derivatives	Nucleotides and derivatives	337930	455800	381470	247310	293740	217860	403770	386250	383610	299410	334340	290650	338070	280930	295860
Uracil	Nucleotides and derivatives	Nucleotides and derivatives	223030	203300	211030	243870	225480	208690	213500	224900	254980	188170	212810	201570	207310	266000	205910
5,6-Dihydrouracil	Nucleotides and derivatives	Nucleotides and derivatives	55209	59300	53990	63893	53046	82357	77163	51219	74726	41977	71492	69769	29523	27163	27044
Adenine	Nucleotides and derivatives	Nucleotides and derivatives	545470	584260	508480	307010	304980	287300	344720	363240	317020	1270300	1606300	1433900	553710	539420	518810
2-Aminopurine	Nucleotides and derivatives	Nucleotides and derivatives	32047	27825	18018	19493	13079	12754	11736	25333	14176	716690	535930	504900	200800	143850	125570
1-Methyladenine	Nucleotides and derivatives	Nucleotides and derivatives	242660	239140	275410	166870	163390	180920	88156	86521	92828	40655	63548	39065	105710	112000	113640
Guanine	Nucleotides and derivatives	Nucleotides and derivatives	71972	69623	69565	54857	54982	34971	47022	40875	38172	34869	42939	53054	46833	50722	48880
Isoguanine	Nucleotides and derivatives	Nucleotides and derivatives	392220	464760	442210	351530	333760	304180	140040	123170	163800	111630	77400	96759	283360	242580	219990
6-O-methylguanine	Nucleotides and derivatives	Nucleotides and derivatives	63671	58950	70462	32968	38174	28180	19244	18970	18041	9808	10369	14956	19172	30113	26650
6-Methylmercaptopurine	Nucleotides and derivatives	Nucleotides and derivatives	4825300	4744500	5312600	3127800	3274200	3119500	2578700	2742600	2303500	2921000	2980200	2664100	2672800	2836200	2734300
2-Deoxyribose-5'-phosphate	Nucleotides and derivatives	Nucleotides and derivatives	65229	60168	53753	13307	23746	35659	27973	43542	35819	15382	13920	9	21066	32098	38483
2-Deoxyribose-1-phosphate	Nucleotides and derivatives	Nucleotides and derivatives	451550	391660	333370	217860	168090	227060	219080	262550	248670	110530	117900	107300	213400	144780	251910
Thymidine	Nucleotides and derivatives	Nucleotides and derivatives	20558	32787	36753	22714	13540	19289	9	9	6610.8	8730.4	6245.9	13151	10147	13475	16691
Cytidine	Nucleotides and derivatives	Nucleotides and derivatives	1285100	1258700	1248200	154730	191380	221600	1140100	902330	1020400	576480	449020	559940	742910	734340	749310
Cytarabine	Nucleotides and derivatives	Nucleotides and derivatives	1125800	1111600	1141500	162170	202950	140330	846880	818550	889310	434240	419370	363120	352880	599130	581520
1-beta-D-Arabinofuranosyluracil	Nucleotides and derivatives	Nucleotides and derivatives	128590	118750	143700	149940	225830	169230	343820	313000	347030	1201700	1240900	1256700	458320	363030	360130
Uridine	Nucleotides and derivatives	Nucleotides and derivatives	139810	108710	102300	163350	211250	196440	275500	335380	337300	1547000	1478300	1426900	489920	446220	434990
5'-Deoxyadenosine	Nucleotides and derivatives	Nucleotides and derivatives	8373.4	6623.2	12995	6070.6	7454	4264.1	3595.7	6472.9	7076.8	111800	99691	126710	29263	24769	25001
2'-Deoxyadenosine	Nucleotides and derivatives	Nucleotides and derivatives	11760	12358	12065	9459.1	12406	9396.4	9998	11270	5099.9	150100	130680	120990	20659	32120	26319
Adenosine	Nucleotides and derivatives	Nucleotides and derivatives	3332300	3356900	3658700	1447200	1894600	1692300	2662700	3606200	3042000	60306000	58869000	61028000	20414000	22208000	17366000
2'-Deoxyguanosine	Nucleotides and derivatives	Nucleotides and derivatives	49298	41117	49133	15112	21855	14610	15090	18900	12272	14119	21282	14435	18556	19004	21538
9-(Arabinosyl)hypoxanthine	Nucleotides and derivatives	Nucleotides and derivatives	34216	37794	44830	27716	28979	46261	43642	41064	40023	70168	98452	73612	39669	30027	50438
2'-O-Methyladenosine	Nucleotides and derivatives	Nucleotides and derivatives	13534	9874.6	21504	27508	25991	19514	18825	25184	13954	96263	127800	86629	40272	22280	33463
Guanosine	Nucleotides and derivatives	Nucleotides and derivatives	7696100	8167400	7703700	2596100	2683300	2501000	5725100	5705000	5509200	6382400	6080400	6051400	4392300	4313300	4403000
Xanthosine	Nucleotides and derivatives	Nucleotides and derivatives	818820	803890	784380	1219000	1387800	1314500	1872600	1861100	1708800	6221800	6644200	6528200	2217800	2281200	2286800
5'-Deoxy-5'-(methylthio)adenosine	Nucleotides and derivatives	Nucleotides and derivatives	11888000	10265000	11233000	7785100	7823600	5782900	8394400	9792100	6981800	938420	992920	1011600	6227900	6497000	7106100
N7-Methylguanosine	Nucleotides and derivatives	Nucleotides and derivatives	18370	23469	36549	24841	30062	26540	109720	99483	69730	36800	41765	41993	35326	46990	42417
N6-(2-Hydroxyethyl)adenosine	Nucleotides and derivatives	Nucleotides and derivatives	10832	9752.3	9739.4	21743	18306	17873	50405	31848	32509	14856	18367	19685	17300	18400	21062
2-(Dimethylamino)guanosine	Nucleotides and derivatives	Nucleotides and derivatives	22176	19153	18912	19358	14002	18173	39341	27059	25500	17316	17695	13058	22694	12997	21498
Cyclic 3',5'-Adenylic acid	Nucleotides and derivatives	Nucleotides and derivatives	9	9	9	9	9	9	9	9	9	29195	31397	24718	7481.3	6577.8	5408.3
2'-Deoxyadenosine-5'-monophosphate	Nucleotides and derivatives	Nucleotides and derivatives	85964	70475	68694	176230	170320	219170	142630	153570	188090	184430	150540	293530	80280	112820	92834
2'-Deoxyinosine-5'-monophosphate	Nucleotides and derivatives	Nucleotides and derivatives	1854800	1688800	2142500	2027200	1385200	1203800	5053300	4150200	4352200	4564000	4084100	3887400	3969500	3739500	2352600
β-Nicotinamide mononucleotide	Nucleotides and derivatives	Nucleotides and derivatives	188950	190450	220830	184610	138980	158820	296930	248430	252170	44371	42925	54068	159680	174410	115320
Adenosine 5'-monophosphate	Nucleotides and derivatives	Nucleotides and derivatives	3320000	3774400	3141400	1460800	1621600	1237900	3442000	2690600	2642500	16357000	16778000	17898000	4446400	4952900	5061600
3'-Adenylic Acid	Nucleotides and derivatives	Nucleotides and derivatives	6474.8	10094	11608	992.16	2974.5	1742.6	7772.7	8046.1	10294	36843	13005	34383	9478	13029	7613.5
Inosine 5'-monophosphate	Nucleotides and derivatives	Nucleotides and derivatives	139700	274940	262940	103340	109270	108470	256280	183690	155900	1594700	1403400	1110700	270950	299320	325350
Guanosine 5'-monophosphate	Nucleotides and derivatives	Nucleotides and derivatives	75745	75362	76845	40390	41689	22550	57472	57794	47175	111030	128080	120240	50822	64079	52780
Isopentenyladenine-7-N-glucoside	Nucleotides and derivatives	Nucleotides and derivatives	663490	755520	599030	703900	796890	603900	1169100	935220	1182600	1129000	1147800	1029200	891550	840760	914280
Succinyladenosine	Nucleotides and derivatives	Nucleotides and derivatives	1276500	1239600	1537300	1381000	1618400	1449800	1659100	2039700	1523700	1663800	1784000	2919300	1358700	1150600	1444800
Ribosyladenosine	Nucleotides and derivatives	Nucleotides and derivatives	26835	17961	10493	46660	32135	38496	38212	60173	35876	101670	52070	71554	29038	46244	29742
Uridine 5'-diphosphate	Nucleotides and derivatives	Nucleotides and derivatives	55140	57259	62466	43352	51092	49110	82653	89020	61647	39643	33254	36260	43869	43978	41817
Adenosine 5'-diphosphate	Nucleotides and derivatives	Nucleotides and derivatives	59894	73584	79823	75912	72949	74312	107260	99154	69732	16758	22096	31980	39831	69432	74546
Flavin Single Nucleotide(FMN)	Nucleotides and derivatives	Nucleotides and derivatives	61960	35220	41061	27199	27532	47373	33153	33892	19139	17129	29323	41605	24228	26396	22049
Citicoline	Nucleotides and derivatives	Nucleotides and derivatives	23386	18655	29659	3827	7788.3	4231.6	23347	6782.8	9308.9	9	9	9	11669	7617.3	7629.3
ATP; Adenosine 5'-Triphosphate	Nucleotides and derivatives	Nucleotides and derivatives	21162	24136	38005	32041	53308	60401	51761	45811	45680	9	9	9	30847	42525	27787
Uridine 5'-diphospho-D-glucose	Nucleotides and derivatives	Nucleotides and derivatives	2380600	2455500	2083200	821780	935390	937360	1658800	1488200	1705400	9	9	9	1453100	1303500	1313100
Nicotinic acid adenine dinucleotide	Nucleotides and derivatives	Nucleotides and derivatives	645540	579240	553530	391580	743480	755180	443050	581700	523710	531980	305100	332160	399870	460000	724470
NADP (Nicotinamide adenine dinucleotide phosphate)	Nucleotides and derivatives	Nucleotides and derivatives	296200	258860	276310	183830	225090	240630	165970	240270	234310	63164	45605	73052	199170	174710	260620
Riboflavin 5'-Adenosine Diphosphate	Nucleotides and derivatives	Nucleotides and derivatives	175610	193380	157390	156230	195740	180130	186040	180110	112810	133800	127240	163420	147990	127360	173550
Daidzein	Flavonoids	Isoflavones	118710	134030	116650	115830	161250	142410	302960	244900	268010	1878900	1440900	2099900	552430	543790	530900
3,9-Dihydroxypterocarpan	Flavonoids	Isoflavones	89142	83159	83469	34003	32493	36858	127540	131340	122410	46891	32645	45890	56881	61938	67315
Isoliquiritigenin	Flavonoids	Chalcones	76480	63325	67740	33478	30490	36659	124010	120300	106310	46546	39363	43946	51957	57536	63569
2,4,4'-trihydroxychalcone	Flavonoids	Chalcones	53962	68628	65149	32329	27535	22250	108870	106060	101990	47231	34108	40097	55958	51754	47840
Liquiritigenin	Flavonoids	Flavanones	192880	177460	169900	245350	299230	274880	1838400	1793800	1854400	1441400	1555800	1438800	818350	857000	867920
6-Hydroxy-2'-methoxyflavone	Flavonoids	Flavones	9	9	9	3096.9	3773	1865.9	9	9	9	30929	12958	17719	6427	5508.4	6262.7
Apigenin	Flavonoids	Flavones	61048	57862	64478	45121	45459	27785	62531	66842	55021	207140	241510	218640	84938	75977	78169
3',4',7-Trihydroxyflavone	Flavonoids	Flavones	88803	113750	110540	67784	54382	63626	126010	103710	104510	464080	418790	420940	160100	156570	126540
6-Hydroxydaidzein	Flavonoids	Isoflavones	43516	26924	23352	28263	23716	17952	49730	31105	48812	38703	27230	34851	24468	25408	22340
Genistein	Flavonoids	Isoflavones	146540	139400	125690	62275	75457	79848	148820	156800	134790	535510	588380	547830	187550	198200	193200
Butin	Flavonoids	Flavanones	762100	710580	664610	84600	83675	89272	286590	271830	260530	113950	128730	132220	235980	264640	262910
Naringenin (5,7,4'-Trihydroxyflavanone)	Flavonoids	Flavanones	543210	525090	535530	58733	71448	66134	212770	221960	181660	98930	107910	100340	196950	185370	191760
Epiafzelechin	Flavonoids	Flavanols	15042	16435	17659	12154	12664	17770	17807	21221	25489	17001	6311.3	16307	26071	12283	12477
Glycitein	Flavonoids	Isoflavones	7047.9	13412	11058	11654	6816.9	7769.9	16051	19641	15548	42363	42112	75290	16985	13986	10424
3',7-dihydroxy-4'-methoxyflavone	Flavonoids	Flavones	82592	169200	100010	123550	64914	89197	184320	171420	135790	488470	506540	615470	175990	216400	208940
Calycosin	Flavonoids	Isoflavones	14097	26203	16216	22152	8884.2	19032	21107	29894	21425	78340	63937	122870	32738	27345	31294
Daidzein-7-O-glucoside(Daidzin)	Flavonoids	Isoflavones	1424800	1475100	1367300	2304500	2450500	2339300	2883400	3826100	2903700	2103900	2420400	2478200	2068000	1825700	2090300
Daidzein-4'-O-glucoside	Flavonoids	Isoflavones	1565400	1668000	1391100	1801300	2399900	2292200	3725000	3102500	2702400	3288500	2248900	2578300	2051500	1788600	2067200
Liquiritigenin-4'-O-Glucoside (Liquiritin)	Flavonoids	Flavanones	234640	215910	237650	175710	181210	195590	1681300	1669800	1823100	1275800	1531000	1334100	825390	930820	943500
Formononetin-7-O-glycoside (Ononin)	Flavonoids	Isoflavones	12085	15015	17487	23938	22311	19709	19156	11392	14468	24923	16830	18721	12823	16706	22424
Apigenin-7-O-glucoside(Cosmosiin)	Flavonoids	Flavones	1354400	1173300	1201800	1279500	1286300	1296100	1426400	1726500	1674600	1034200	1028300	1297300	1309100	1202400	1484600
Genistein-7-O-Glucoside (Genistin)	Flavonoids	Isoflavones	2612400	2469600	2678000	2750500	2894100	3250500	4166800	4512200	3947700	2955500	2667100	2778600	2697000	2677100	2863100
Apigenin-5-O-glucoside	Flavonoids	Flavones	1462700	1963300	1467100	2563400	2608300	3659400	11472000	9732900	8470600	8813400	8441900	8106700	4928600	5049300	4347900
Butin-7-O-glucoside	Flavonoids	Flavanones	2276900	2042600	1852400	1429600	1330400	1464900	1223500	1286000	1397000	1037300	925840	1103700	1238700	1488400	1244100
Engeletin	Flavonoids	Flavanonols	73072	61245	63772	72147	86240	67214	115230	117480	104970	96877	46164	68434	70115	74244	74670
Isohemiphloin	Flavonoids	Flavonoid carbonoside	309570	282090	235490	275040	341250	269820	186010	205310	153840	156690	163220	141310	217520	200400	167750
Naringenin-7-O-glucoside (Prunin)	Flavonoids	Flavanones	951410	898300	914830	676030	783900	735370	953140	1012300	927720	685130	691770	693260	770940	701370	886150
Dihydrocharcone-4'-O-glucoside	Flavonoids	Chalcones	32034	325540	306720	58731	66967	49074	52008	22170	65556	11901	24667	21831	66709	66813	77785
Phloretin-4'-O-glucoside (Trilobatin)	Flavonoids	Chalcones	191280	185560	188780	368370	386490	359590	230150	251630	257790	196360	206020	231120	202890	199580	222500
Phloretin-2'-O-glucoside (Phlorizin)	Flavonoids	Chalcones	23079	231430	180260	28382	34788	34248	36461	14356	35327	13295	21012	7388.4	48198	40296	59703
Calycosin-7-O-glucoside	Flavonoids	Isoflavones	17598000	21013000	17270000	20496000	15601000	18974000	44115000	41370000	34429000	30414000	20197000	39791000	23675000	26699000	24962000
Glycitin	Flavonoids	Isoflavones	1199300	1386500	1193600	1374300	973330	1631000	2201800	3152200	2841600	2312900	2138600	3129400	1572000	1876500	1692700
Luteolin-3'-O-glucoside	Flavonoids	Flavones	214240	240620	219310	258700	293620	221660	889890	793640	947350	685390	763900	894190	451050	852700	568120
Kaempferol-3-O-glucoside (Astragalin)	Flavonoids	Flavonols	273320	240350	227930	194880	208470	179110	884850	917310	613880	872030	789160	936020	464070	485480	446370
Luteolin-4'-O-glucoside	Flavonoids	Flavones	251310	246750	211510	198840	265810	220210	940770	587180	966000	857620	927780	873890	468980	472490	549290
Kaempferol-3-O-galactoside (Trifolin)	Flavonoids	Flavonols	32489	25704	31094	17611	34467	37800	84107	89689	83597	85135	85522	92843	65023	52551	61702
Kaempferol-7-O-glucoside	Flavonoids	Flavonols	21765	20812	33781	32211	23865	23106	77770	113020	102770	87420	96810	89563	61188	60599	73472
Luteolin-7-O-glucoside (Cynaroside)	Flavonoids	Flavones	2882900	3289800	2730900	2965700	2868300	2833100	5881800	4300100	3521700	3465700	3350100	3054400	2887100	2655800	3328600
Aureusidin-4-O-glucoside	Flavonoids	Aurones	415430	233920	216380	246290	233440	211030	1092800	986410	895460	866530	1006200	1234100	319700	580610	539570
Eriodictyol-7-O-glucoside	Flavonoids	Flavanones	178980	123760	151790	178600	140520	84764	306530	371030	223660	264440	237800	291830	167450	190470	203190
Aromadendrin-7-O-glucoside	Flavonoids	Flavanonols	2306200	2288000	2330600	3007100	3175200	3004600	4492300	4609000	4216000	3684400	3592900	3484400	2945400	3028700	3160400
3',5,5',7-Tetrahydroxyflavanone-7-O-glucoside	Flavonoids	Flavanones	157340	101920	138520	155530	156500	139950	328840	272020	284970	196560	260710	242550	151700	163930	200380
6''-O-Acetyldaidzin	Flavonoids	Isoflavones	2655100	3020200	2705700	5167800	5087700	4440300	5484900	5050200	5010700	1006200	966070	987100	3023300	2764400	2798300
Pratensein-7-O-glucoside	Flavonoids	Isoflavones	312700	256170	279770	239250	181770	191980	251480	270690	216940	148410	141220	131850	177080	197980	180370
6-C-MethylKaempferol-3-glucoside	Flavonoids	Flavones	810200	1025900	750370	838730	535320	637740	1166400	1266200	911770	639510	647460	1196900	747790	768880	806120
Chrysoeriol-7-O-glucoside	Flavonoids	Flavones	36283	53604	23250	33950	23677	27735	40965	43309	32318	27318	25825	44723	27936	38503	35453
Diosmetin-7-O-galactoside*	Flavonoids	Flavanones	880820	1031500	681850	709460	513930	559670	1183000	1423400	1165500	624590	557290	1176300	928920	728220	632860
Diosmetin-7-O-glucoside*	Flavonoids	Flavanones	932530	1091600	739730	715550	523980	688250	1193500	1163300	932320	659500	623740	807010	705240	778450	749350
Hispidulin-7-O-Glucoside	Flavonoids	Flavones	842550	1142400	761450	821440	552010	515980	1115100	1298900	975130	678100	605240	1122700	967090	736160	847600
Quercetin-3-O-galactoside (Hyperin)	Flavonoids	Flavonols	13721	12336	22170	15525	15226	6566.4	16820	26273	15507	18391	16067	18276	41390	47933	28381
Quercetin-3-O-glucoside (Isoquercitrin)	Flavonoids	Flavonols	17315	28174	24249	11294	10671	10090	16065	16174	17445	12725	7613.3	22770	30420	38848	36285
Apigenin-7-O-(6''-acetyl)glucoside	Flavonoids	Flavones	4762200	4598400	4599100	5767300	6061500	5734200	5378700	6691600	5366200	1073600	1076800	1078500	3867400	3996500	3703400
6''-O-Acetylgenistin	Flavonoids	Isoflavones	208560	211700	197900	287170	353860	328750	342860	258050	231920	64873	55419	45573	173860	182980	193750
5,2'-Dihydroxy-7,8-dimethoxyflavone glycosides	Flavonoids	Flavones	51464	38362	39226	31446	24364	25207	36667	28194	32212	19299	17204	17551	26400	27463	25801
6''-O-Acetylglycitin	Flavonoids	Isoflavones	32212	51295	33811	69503	32043	62280	86240	90933	69383	24852	27467	28244	40116	45364	43196
Kaempferol-3-O-(6''-acetyl)glucoside	Flavonoids	Flavonols	171500	161000	255400	221820	193350	220670	714260	1016700	753790	870390	764040	696350	341580	472800	399330
6''-O-Malonyldaidzin	Flavonoids	Isoflavones	1425400	1238100	1331600	1909100	1824100	2007200	1849700	1772100	1870700	1807800	1854600	1741900	1456600	1828900	1745500
Kaempferol-3-O-(2''-O-acetyl)glucuronide	Flavonoids	Flavonols	1098700	1135200	1041700	1319600	1383200	1298000	1547000	1617400	1430600	1496600	1426300	1325000	1057200	1041800	1114500
Pinocembrin-7-O-(6''-O-malonyl)glucoside	Flavonoids	Flavanones	301900	277030	291880	334770	342810	318400	830780	723720	749300	592410	537550	516130	409680	379210	379800
Daidzein-7-O-(2''-benzoyl)rhamnoside	Flavonoids	Isoflavones	8732800	9499100	9223100	12565000	13826000	13288000	13558000	13843000	11757000	13922000	12107000	11304000	10711000	10886000	10803000
Formononetin-7-O-(6''-Malonyl)glucoside	Flavonoids	Isoflavones	69765	65413	56014	51954	40850	39702	36666	30680	40698	116090	33918	27135	37433	50134	45098
6''-O-Malonylgenistin	Flavonoids	Isoflavones	2681300	2463800	2581600	2930700	2915400	2423800	3115800	3264500	2978100	2709700	2584200	2567900	2733500	2575700	2559400
Apigenin-7-O-(6''-malonyl)glucoside	Flavonoids	Flavones	16969000	15887000	15888000	18426000	18048000	17741000	21513000	20741000	18157000	16927000	17573000	14871000	16221000	16612000	15394000
Genistein-7-O-(6''-malonyl)glucoside	Flavonoids	Isoflavones	470170	291850	251440	479740	501670	489910	2005400	1535100	1333900	983880	881860	1051100	588580	735680	882940
6''-O-Malonylglycitin	Flavonoids	Isoflavones	2366200	2764500	2331000	2611500	1821500	2572500	4625800	4414600	3583000	2711600	2283500	3679900	2497300	2898900	3544200
Kaempferol-3-O-(6''-malonyl)glucoside*	Flavonoids	Flavonols	915190	1083200	999230	1358200	1327200	1336100	3543600	4112000	2878100	4177800	3951100	4281500	2043600	2723700	2455600
Luteolin-7-O-(6''-malonyl)glucoside	Flavonoids	Flavones	32313	23714	36916	29263	28277	24486	24796	24816	29739	23585	26479	29729	24104	32240	25729
Kaempferol-3-O-(6''-malonyl)galactoside*	Flavonoids	Flavonols	1191600	1453500	1010100	1122600	1039200	1161300	4022100	4596200	4213600	4457700	4039800	3953800	2212400	2283800	2278600
Kaempferide-3-O-(6''-malonyl)glucoside	Flavonoids	Flavonols	119330	110250	103760	183550	162330	168970	407360	444140	350860	178100	160630	152330	168900	193930	172790
Chrysoeriol-7-O-(6''-malonyl)glucoside	Flavonoids	Flavones	867500	931680	685900	834260	751440	817620	1032700	1086400	768280	786590	718420	950480	750420	774800	712730
Diosmetin-7-O-(6''-malonyl)glucoside	Flavonoids	Flavanones	12831	11424	10414	14564	10999	10258	27311	17572	24310	23430	27217	26505	15701	21516	14293
Daidzein-7-O-apiosyl(1→6)glucoside	Flavonoids	Isoflavones	197320	230110	190660	358200	433780	392520	582170	619120	665990	868010	859190	743170	333830	664780	533740
Daidzein-7-O-Glucoside-4'-O-Apioside	Flavonoids	Isoflavones	2458200	2688800	1790100	2168400	2697700	2887500	943690	1121200	1033500	1341000	716020	977230	1472300	1677200	1511800
Quercetin-7-O-(6''-malonyl)glucoside	Flavonoids	Flavonols	19403	10719	16528	30776	14547	19907	42903	32539	33460	31064	39033	19934	26205	31928	21957
Apigenin-8-C-(2''-xylosyl)glucoside*	Flavonoids	Flavonoid carbonoside	43933	55912	54563	110630	81051	107690	197210	168480	163650	100660	238680	234210	126290	112600	109030
Apigenin-7-O-(2''-glucosyl)arabinoside	Flavonoids	Flavones	157280	124370	110830	156360	158050	139510	60720	70861	58333	55883	29305	75954	82029	93024	88947
Apigenin-6-C-(2''-xylosyl)glucoside*	Flavonoids	Flavonoid carbonoside	35488	29587	27973	86507	82406	100480	160570	189090	116020	225520	178650	144040	136620	114480	123900
Isovitexin-2''xyloside	Flavonoids	Flavonoid carbonoside	942030	534350	621080	923250	958230	941110	682450	711770	628640	661270	654930	831750	705880	731140	680440
Hispidulin-8-C-(2''-O-xylosyl)xyloside	Flavonoids	Flavonoid carbonoside	844880	623650	613130	498120	833330	774010	298580	335400	298380	265960	317260	341620	390470	321350	567410
Pinocembrin-7-O-neohesperidoside	Flavonoids	Flavanones	9	9	9	9	9	9	43193	47477	46864	38910	32760	34777	22141	24899	22923
Pinocembrin-7-O-rutinoside	Flavonoids	Flavanones	9	4577.4	9	6884.7	8382.5	6378.6	71753	68199	65352	56389	72599	52821	31757	32162	34896
Kaempferol-3-O-sambubioside	Flavonoids	Flavonols	29439	31567	30067	22397	25573	23646	9	9757.6	9	9	9	9	23183	21903	29652
Luteolin-7-O-rutinoside	Flavonoids	Flavones	106920	63553	59308	42107	60075	42474	162450	180730	161210	150240	129720	139480	98734	116490	111710
Kaempferol-3-O-rutinoside(Nicotiflorin)	Flavonoids	Flavonols	18769	30219	25098	11168	21610	18318	62148	59651	61001	57622	47849	50543	30449	50176	39051
Kaempferol-3-O-neohesperidoside	Flavonoids	Flavonols	735180	697380	722150	493340	568640	464690	2086600	1769600	1943900	1850600	1938600	2002200	1061500	1182100	1052300
Luteolin-7-O-neohesperidoside (Lonicerin)	Flavonoids	Flavones	686820	691430	732410	345320	567340	412270	2290500	2003900	1796500	2009800	1944800	1965600	1105500	957160	1280200
Vitexin-2''-O-galactoside	Flavonoids	Flavonoid carbonoside	50390	53478	61023	76675	77625	75294	115890	124180	112570	103540	117980	90311	63073	80721	71641
Luteolin-7-O-gentiobioside	Flavonoids	Flavones	6511000	6451500	7018900	6588600	7297400	7055500	6805000	6125600	5284100	5628400	6214400	7181500	5435000	5574900	6659800
Luteolin-7,3'-di-O-glucoside	Flavonoids	Flavones	7592400	7383000	7249300	6820600	7023200	6706900	7137100	7728200	5357900	6470900	6838800	6335400	5877900	5474900	5592700
Kaempferol-3-O-galactoside-4'-O-glucoside	Flavonoids	Flavonols	6174900	6148600	6926000	7093000	7937800	10172000	8214700	6893400	6749300	5794900	6390900	6603100	6311500	5499500	5730800
Luteolin-6,8-di-C-glucoside	Flavonoids	Flavonoid carbonoside	9	9	9	18212	18866	23503	5360.6	7202.2	6457.2	34624	32861	21503	13499	13445	17984
Kaempferol-3,7-di-O-glucoside	Flavonoids	Flavonols	36518	22487	18567	17220	27185	19217	57874	45584	49237	55312	64211	45260	26870	41615	38442
Hesperetin-6-C-glucoside-7-O-glucoside	Flavonoids	Flavonoid carbonoside	21243	16115	11250	22072	12165	18345	16008	12142	10821	7537.4	9008.5	14614	12571	21081	17458
Apigenin-7-O-(2''-O-apiosyl)(6''-Malonyl)glucoside	Flavonoids	Flavones	56924	54210	70904	85899	52187	64701	82394	75249	80612	97380	74243	77080	55716	47880	57350
Luteolin-7-O-(6''-malonyl)glucoside-5-O-rhamnoside	Flavonoids	Flavones	211020	222290	232990	121770	134200	145690	817080	656510	618070	582540	614240	575370	352910	425450	372730
Kaempferol-3-O-(6''-Malonyl)glucoside-7-O-Glucoside	Flavonoids	Flavonols	26027	42460	24478	30252	30867	42337	75230	136900	69525	52794	53560	88230	42926	42860	39992
Isovitexin-2''-O-(6'''-p-coumaroyl)glucoside	Flavonoids	Flavonoid carbonoside	9	9	9	9	9	9	602040	495140	434230	471710	478900	447590	214500	220470	198260
Luteolin-7-O-Sophoroside-5-O-arabinoside	Flavonoids	Flavones	15526	20162	7741.1	16470	10013	14629	21825	26533	28783	50301	32428	32546	16943	14474	22830
Kaempferol-3-O-(6''-Rhamnosyl-2''-Glucosyl)Glucoside (Camelliaside A)	Flavonoids	Flavonols	764420	541070	652110	777580	748990	643360	1002600	1002100	1256400	869050	858520	986950	627570	769320	687810
Kaempferol-3-O-rutinoside-7-O-glucoside	Flavonoids	Flavonols	1073500	835360	781890	1279300	599870	625700	1057200	972290	936660	914060	1175800	989580	672940	780810	750760
2,6-Dimethoxy-1,4-benzoquinone	Quinones	Quinones	484050	464620	537330	476010	542010	639070	1251600	1313500	929990	1288600	988290	1136800	510780	792650	685840
Rhein-8-O-(6'-O-acetyl)glucoside	Quinones	Anthraquinone	399830	462080	285290	390720	360610	307840	606920	482860	532100	506010	368940	627190	464270	393830	485390
Rhein 1-O-(O-acetyl)-glucoside	Quinones	Anthraquinone	323560	375670	326430	264830	272900	257640	497800	407210	486820	356050	285110	406210	376260	329790	329750
Physcion-8-O-(6-acetyl)-glucoside	Quinones	Anthraquinone	3225.4	4097.8	3739.8	6905.7	9364.4	11191	15451	15099	14861	9926.7	9439	11647	5736.3	10444	5849
Scopoletin (7-Hydroxy-5-methoxycoumarin)	Lignans and Coumarins	Coumarins	182760	188160	136300	138940	162990	231320	160840	118640	115740	165900	169520	177720	145290	135050	152580
Fraxetin (7,8-Dihydroxy-6-methoxycoumarin)	Lignans and Coumarins	Coumarins	221520	194820	228980	331810	192420	238890	216860	195350	244120	173240	231650	220180	222900	202700	219750
Scopoletin-7-O-glucuronide	Lignans and Coumarins	Coumarins	115930	102450	102710	101290	130840	97656	137880	112620	107800	107120	132770	138440	82550	120240	177160
Secoisolariciresinol 4-O-glucoside	Lignans and Coumarins	Lignans	79780	82339	89737	61272	44607	72353	81107	90463	59492	52582	63648	46051	63740	60903	56747
Pinoresinol-4-O-(6''-acetyl)glucoside	Lignans and Coumarins	Lignans	116990	128910	92385	108280	104840	95093	213590	183410	216060	237280	254550	225200	134960	150570	141960
Syringaresinol-4'-O-glucoside	Lignans and Coumarins	Lignans	63090	64850	66894	84643	93370	77782	54575	61540	54035	68297	57351	60397	44993	54180	73105
Syringaresinol-4'-O-(6''-acetyl)glucoside	Lignans and Coumarins	Lignans	2117700	1824500	2008700	2576600	2801600	2660000	2025700	1973700	1753700	2601400	1950000	2374400	1992900	2012300	1920300
Secoisolariciresinol diglucoside	Lignans and Coumarins	Lignans	12435	8328.4	17555	12413	9989	11939	11981	15972	14674	13990	11478	13195	14418	14757	17468
D-Threose	Others	Saccharides and Alcohols	105340	90721	92303	52664	44352	49629	17244	11219	21055	14041	10740	6563.3	28763	37136	39164
Nicotinamide	Others	Vitamin	34951	30992	37270	90666	79594	66284	118590	144370	209700	9	9	9	95337	94978	67917
D-Threitol	Others	Saccharides and Alcohols	304590	360350	330690	341710	397070	470720	355460	233480	275620	289590	309840	259280	236010	383480	262460
Isonicotinic acid	Others	Vitamin	770900	742140	696050	795750	858290	754860	614350	683840	630640	148750	179990	168950	712930	458270	435500
Nicotinic acid (Vitamin B3)	Others	Vitamin	903810	1048000	875800	861480	1296100	926790	839650	1002600	907770	210740	285510	201680	699170	646230	769280
5-Hydroxymethylfurfural	Others	Others	251420	324220	320960	414170	473190	454820	505660	382690	507580	769290	674660	587090	492870	413650	490820
4-Guanidinobutanal	Others	Others	15214000	19434000	19450000	9734400	9159300	11396000	8079800	7251900	8132200	5764400	5183600	4755500	12082000	9312600	9925700
3-Dehydro-L-Threonic Acid*	Others	Saccharides and Alcohols	14329000	14546000	14311000	5919100	5427800	5433800	9764900	10313000	9912700	1706300	1444200	1557400	8410300	7999300	7890900
D-Threonic Acid	Others	Saccharides and Alcohols	233790	175410	221980	89549	79888	119910	202860	209990	219970	58101	63136	71117	134680	149900	152540
2-Dehydro-3-deoxy-L-arabinonate	Others	Saccharides and Alcohols	488600	483430	470480	592440	615740	534640	518120	515090	459490	669070	683090	572040	543670	453460	510180
D-Arabinono-1,4-lactone	Others	Saccharides and Alcohols	207460	161640	262590	204190	233680	305120	318710	251910	228320	317150	295310	372420	308770	168600	337340
D-Arabinose	Others	Saccharides and Alcohols	242490	244260	181760	129540	126760	141790	147720	182750	141280	131720	98136	95273	152780	135220	147860
DL-Xylose	Others	Saccharides and Alcohols	203920	219070	248980	130440	124670	128770	173010	153650	164910	156120	127000	131420	149570	138330	142740
D-Ribose	Others	Saccharides and Alcohols	69049	87120	69957	67826	63717	62230	44603	57248	49110	34180	28890	37765	49123	49917	44668
D-Arabitol*	Others	Saccharides and Alcohols	50922	34883	36132	38161	43925	49938	72017	76427	56043	84737	101220	68289	45951	62618	74246
Ribitol*	Others	Saccharides and Alcohols	59187	40982	36623	48625	49283	66161	96476	92329	68322	92268	98606	98389	57546	77459	37090
Xylitol	Others	Saccharides and Alcohols	23605	24581	27755	31866	31919	39090	39652	40125	32609	55806	70229	60178	40489	38246	41114
Orotic acid	Others	Vitamin	86179	88077	112010	87737	145960	125860	81887	87901	96720	67095	80556	77478	71871	84807	54888
1-Decanol	Others	Saccharides and Alcohols	3508400	3422500	3560100	3498200	3650000	3640600	3510800	3467100	3485000	3542300	3299300	3296500	3368500	3376500	3545600
1,6-anhydro-β-D-glucose	Others	Saccharides and Alcohols	87859	79549	61835	68289	55164	48564	60092	52363	62082	9	9	7634.8	56135	55995	60040
1,5-Anhydro-D-glucitol	Others	Saccharides and Alcohols	65951	87030	45995	57473	57099	58843	74269	43357	55426	150970	118070	182120	60036	76130	36972
D-Fucose	Others	Saccharides and Alcohols	33583	12051	25921	36431	27134	13603	21182	38438	28908	50248	69411	76205	51862	26465	33167
D-Xylonic acid	Others	Saccharides and Alcohols	2759400	2804300	2797000	2761500	2878300	2892900	2680100	2618000	2887500	2927300	3134800	3304100	2695800	2667700	2859400
L-Fucitol	Others	Saccharides and Alcohols	217990	199900	203200	216910	224670	247210	175440	202920	186150	257680	246240	261770	238730	230640	234970
Pyridoxal	Others	Vitamin	24875	26061	24937	21406	28797	23699	30801	27498	21972	24611	26416	16975	23812	19917	20436
4-(Aminomethyl)-5-(hydroxymethyl)-2-methylpyridin-3-ol	Others	Others	88539	71282	92724	84948	83408	58995	66838	54852	71440	61729	57012	56706	71390	49676	45613
Pyridoxine	Others	Vitamin	38208	47115	44099	101510	97005	86245	135500	105370	78236	437850	519580	482670	161030	191350	107430
Dihydroxyacetone phosphate	Others	Saccharides and Alcohols	59978	79209	89654	103260	128320	135410	131600	100790	100290	9	9	9	57534	78436	84025
L-Ascorbic acid (Vitamin C)	Others	Vitamin	366480	621480	492890	220000	253220	299080	745710	874970	916200	147850	132380	168940	230630	248100	308570
Erythorbic Acid; Isoascorbic Acid	Others	Vitamin	100230	142840	114730	79143	65694	52352	121030	169320	132710	35925	57732	49546	36201	88841	77266
D-Glucurono-6,3-lactone	Others	Saccharides and Alcohols	35703	41533	47026	32590	44399	29757	78647	76040	56615	28800	23484	31230	30401	29161	45476
L-Gulono-1,4-Lactone	Others	Saccharides and Alcohols	73549	72735	63612	72221	84663	65891	60932	65581	72080	83103	78816	78373	74894	62492	62561
D-Glucosamine	Others	Saccharides and Alcohols	7496400	7400200	8496500	7184800	7361500	7799100	7057300	7372600	6317900	8455600	7656700	8454300	7724200	6581500	7473200
Inositol*	Others	Saccharides and Alcohols	2473400	2765900	2702700	2087000	2034600	1991000	2148300	2202300	1906500	308850	340260	273900	1678300	1608600	1704500
D-Fructose*	Others	Saccharides and Alcohols	2669700	2806000	3030100	1800700	2127300	1842400	2336000	1959900	1810700	316410	339460	334790	1678600	1738400	2000600
D-Mannose*	Others	Saccharides and Alcohols	3281400	3609700	3246100	2627100	2814600	2572800	2870900	2807700	2580300	355940	327420	327610	2200900	2359100	2411400
D-Galactose*	Others	Saccharides and Alcohols	2222200	2287600	2520500	1894300	2148100	2117100	2380800	2370800	2020500	302950	339850	311820	1731900	1701000	1885200
D-Glucose*	Others	Saccharides and Alcohols	2661800	2908700	2651100	1978600	1750500	1981400	2300100	2304300	1996900	355100	340590	263810	1826600	1884300	1699000
Dulcitol*	Others	Saccharides and Alcohols	41460	47019	35072	76903	64367	85965	86882	94672	103770	124860	119650	153060	82803	79810	78756
D-Mannitol*	Others	Saccharides and Alcohols	8712.8	14483	10831	8789.5	9699.2	16832	28194	15813	26686	37894	27172	40330	15282	21356	8719.1
D-Sorbitol	Others	Saccharides and Alcohols	27767	30244	19711	41086	46924	36948	58476	49058	64872	77630	74259	62838	47344	51505	35349
4-Pyridoxic acid	Others	Vitamin	40599	30628	31996	40087	51882	54323	45905	35164	46809	76099	53659	70715	41836	43949	43984
2,6-Dimethyl-7-octene-2,3,6-triol	Others	Saccharides and Alcohols	109480	128800	114020	16491	26933	15499	24385	22029	13493	28828	29773	18591	31256	36192	48684
D-Galacturonic acid*	Others	Saccharides and Alcohols	255450	277150	301410	555750	624220	591170	5097200	4705300	4849500	1821200	1912000	2035000	1806400	1920200	2036400
D-Glucoronic acid*	Others	Saccharides and Alcohols	343900	330700	431980	669740	815050	717810	5880300	5472100	5266400	2247100	2390100	2408400	2121600	2098000	2196200
L-Quebrachitol	Others	Saccharides and Alcohols	15432	16263	16098	12241	9276.3	18435	18124	21421	22054	14949	11446	18209	13106	15505	13819
D-Pinitol	Others	Saccharides and Alcohols	38797	37337	25717	47466	50215	58917	119700	101510	152790	67387	62265	75401	41334	70768	62301
Gluconic acid	Others	Saccharides and Alcohols	284930	286920	288820	545230	582880	581960	1619500	1654500	1520100	5060800	5078400	5182300	1843900	1984300	1733400
D-Erythrose-4-phosphate	Others	Saccharides and Alcohols	55068	55710	71443	35850	44959	58445	63199	72387	72196	6983.7	6704.5	5523	37304	37971	36676
D-Panthenol	Others	Saccharides and Alcohols	8626.1	8847.9	7678.8	22246	8606	22554	24899	26768	7438.3	14258	8160.1	10501	6502.6	3957.5	7864.8
D-Galactaric acid*	Others	Saccharides and Alcohols	274220	299570	314960	502670	568060	553350	484800	727060	769380	1396300	1160800	1261900	713650	630390	518540
D-Saccharic acid*	Others	Saccharides and Alcohols	731120	767390	682260	1488000	1668500	1636900	1638700	1821600	1656100	2148100	2156900	2242900	1151600	1363400	1431900
Sedoheptulose	Others	Saccharides and Alcohols	87293	162930	173590	337730	338560	214360	282610	340960	294100	583610	621530	565630	309580	281770	271570
D-Pantothenic Acid	Others	Vitamin	635040	611990	610050	690130	835970	770510	656340	660850	601430	915070	822980	833190	571600	613780	614260
N-Acetyl-D-galactosamine	Others	Saccharides and Alcohols	1424700	1286200	1083100	1309400	1150500	1142800	1408900	1384000	1085800	1521600	994310	1200200	1072600	1078900	951830
N-Acetyl-D-mannosamine	Others	Saccharides and Alcohols	39930	52051	57495	122790	128450	111090	98339	94750	103430	1006900	824420	861520	230970	211400	208760
N-Acetyl-D-glucosamine	Others	Saccharides and Alcohols	4221000	4826800	4558400	4552700	4577100	4495200	4952400	4706600	4582700	4577500	4814700	4933000	4788600	4410000	4296100
Biotin	Others	Vitamin	28192	59798	41231	45170	55014	53008	49761	55726	35808	29698	18534	16739	27641	29434	27643
Nicotinate D-ribonucleoside	Others	Vitamin	1383800	1292900	1275500	2138400	2367700	2205500	3002500	2174800	2246800	3285400	2865600	3154600	2196400	1708100	2031900
D-Glucosamine 1-phosphate	Others	Saccharides and Alcohols	30381	23884	27398	26826	21252	28166	24767	29042	22451	17400	10891	16367	24560	17824	11358
Glucose-1-phosphate*	Others	Saccharides and Alcohols	7616000	7407200	7610600	5196400	5547400	5647600	8908600	8482300	7467600	28421	20753	28073	4863200	4742900	5669100
D-Glucose 6-phosphate*	Others	Saccharides and Alcohols	8468800	9046000	8380000	6552800	6729600	6608300	9883000	10046000	8762800	17311	14619	21174	5469400	5484300	5748500
D-Fructose 6-Phosphate	Others	Saccharides and Alcohols	5822100	5818400	5974800	4411800	4071700	4571600	6487600	6022900	6218800	17906	19334	19651	3915200	4233500	3843200
Sorbitol-6-phosphate	Others	Saccharides and Alcohols	45183	49818	44473	34462	40043	33642	66487	51060	60217	9	8715.7	7872.6	33331	30579	33331
Vidarabine	Others	Others	2641300	3185200	2518400	1609700	1692100	1526200	3054100	4376600	2909900	53707000	50628000	52776000	14703000	22057000	20985000
6-Methoxy-2-(2-phenylethyl)chromone	Others	Others	45938	45248	38003	45335	62899	58542	34433	58587	39176	56343	49387	51244	24403	20322	17900
1-phenyl-7-(4-hydroxyphenyl)-4-ene-3-heptanone	Others	Others	893910	1229500	1125100	998230	1280300	1283400	1544300	1123200	1897300	1176600	2017300	1421700	1356800	1303200	1320800
Kushenin	Others	Others	2331.5	4605.9	3122.3	2806.3	1256.6	3120.6	3717.5	6216.9	5269.6	9725.8	12318	18858	4365.2	6368.3	4497.1
D-Sedoheptuiose 7-phosphate	Others	Saccharides and Alcohols	409890	480660	347620	526460	497130	352220	414140	529470	579980	585850	530380	360120	561500	469550	665800
cis-Abienol	Others	Saccharides and Alcohols	20211	23512	18670	23204	21353	22025	26291	21916	29625	25138	24292	20524	24084	27568	22552
Pyridoxine-5'-O-glucoside	Others	Vitamin	178040	152560	151840	490140	437260	412840	123940	157270	99831	387200	440610	493130	220570	246040	241920
D-Glucose 1,6-bisphosphate	Others	Saccharides and Alcohols	23029	15509	19780	35845	59014	31300	42323	27165	22667	22866	21739	19961	20899	22439	28848
D-Trehalose*	Others	Saccharides and Alcohols	4444300	4728600	4701600	4435700	5570800	4467700	5186000	6070500	5350700	7314600	7921500	7485200	4469700	5186700	4814100
D-Sucrose*	Others	Saccharides and Alcohols	8788200	10016000	8465100	10219000	11369000	10214000	12380000	12692000	12801000	15553000	15761000	15977000	10574000	11930000	10165000
D-Cellobiose	Others	Saccharides and Alcohols	76766	93935	81824	93476	92900	74777	137010	109600	93403	186190	192930	127650	129380	118120	128700
Isomaltulose*	Others	Saccharides and Alcohols	9893300	7739200	9529800	9029900	9848200	8069400	10929000	9127200	12150000	12161000	15230000	13279000	6992200	7812300	11830000
Galactinol	Others	Saccharides and Alcohols	18276000	19636000	17758000	20424000	23140000	22311000	23357000	23998000	24637000	27792000	29135000	30336000	20049000	21530000	21376000
Lactobiose	Others	Saccharides and Alcohols	9825500	9505900	10252000	8599500	10655000	10934000	12036000	11714000	11595000	13525000	13597000	15443000	9316500	8737500	10848000
D-Maltose*	Others	Saccharides and Alcohols	7070400	7485300	8415500	11082000	9627900	11718000	13270000	9183800	10162000	14017000	15923000	14562000	10255000	9912000	8685200
Melibiose	Others	Saccharides and Alcohols	4200900	4382500	3301700	4631400	4825300	3892400	4841800	4938500	4921900	6034900	5585300	6791000	4249100	4430300	3884600
Maltitol	Others	Saccharides and Alcohols	177470	204950	206130	227720	183660	204940	281790	301380	285660	284570	291020	360110	164530	182380	227750
Lactitol	Others	Saccharides and Alcohols	113440	88286	116070	112720	94829	122670	132040	127950	100520	146780	200410	159380	113510	117160	93861
Riboflavin (Vitamin B2)	Others	Vitamin	109270	118130	91790	58393	73195	51254	96121	167310	117610	43759	54651	56898	66366	57202	39742
Majoroside	Others	Others	11511	7077.5	11187	23828	27449	18499	18199	15702	11608	12085	26549	24373	20579	8486.5	17228
Secoxyloganin	Others	Others	78487	56214	59302	51861	47379	41068	35551	49528	34274	42390	25197	55813	41648	30070	57426
Trehalose 6-phosphate	Others	Saccharides and Alcohols	69193	56607	57734	53061	65368	57769	60844	70571	52453	109810	123770	108060	56593	58250	66947
Licoagroside B	Others	Others	461330	382940	338740	554200	635030	585950	474780	466430	392240	933550	684620	768240	451540	437840	523120
Kuraridinol	Others	Others	17887	11400	11809	5602.2	10774	12464	9432.1	14151	10583	10673	7911.9	10090	10084	8834	5545.1
Calcium Pantothenate	Others	Vitamin	8801.4	8767.8	9771.2	31507	28043	22365	28674	15977	17235	28935	35986	32976	15962	12809	15724
D-Panose*	Others	Saccharides and Alcohols	183360	253570	224310	1051900	1092600	1322500	1060300	969680	803320	1010900	1024400	1105400	819400	734140	705920
Maltotriose	Others	Saccharides and Alcohols	518780	612670	714980	1512300	2308700	1796300	2497200	1504100	1984100	2229300	2510100	2002200	1420600	1494600	1661400
Raffinose*	Others	Saccharides and Alcohols	684740	738960	799270	4267000	5652100	4165800	4528200	3951600	3420700	4940200	4688200	4673200	2875700	3054400	2956600
D-Melezitose	Others	Saccharides and Alcohols	117390	92426	89154	380650	451280	484290	421580	392890	309850	445450	544950	557700	370460	238000	366970
Propyl 2-(trimethylammonio)ethyl phosphate	Others	Others	932560	984510	886110	692740	749810	762080	761840	750910	606060	764450	757050	706980	643810	675570	722660
D-Maltotetraose	Others	Saccharides and Alcohols	17771	34331	19857	173770	189170	225790	108000	124790	120680	367110	408490	389360	127420	159840	183940
Stachyose	Others	Saccharides and Alcohols	125010	131790	123120	1845900	2447800	2154500	1227900	1279700	1283900	4978600	5243200	4959400	1783200	1816500	2115000
Nystose	Others	Saccharides and Alcohols	183180	140860	152710	2558500	3049600	2701200	1438600	1564200	1355200	5676400	5225400	6343000	2543900	2470000	2469100
Maltopentaose	Others	Saccharides and Alcohols	7407.5	11556	5164	21817	14912	14680	16411	16616	9992.6	22914	19667	14808	16528	17376	13648
Verbascose	Others	Saccharides and Alcohols	7358.7	4251.8	5865.1	20346	19427	13662	6555.5	10204	5247.5	22165	12531	20855	14203	20943	18169
Azetidine-2-carboxylic acid	Alkaloids	Alkaloids	1364900	1541300	1363700	614400	729890	657590	540990	533490	601700	590750	482860	467670	964950	1094300	921540
Choline	Alkaloids	Alkaloids	21776000	21697000	20557000	17838000	18706000	17983000	18896000	17709000	18168000	16339000	15033000	14440000	19246000	17955000	17037000
Histamine	Alkaloids	Alkaloids	65761	59595	73315	54950	80291	53865	34567	24897	22929	9	9	9	38141	40263	29359
Guanidinoacetate	Alkaloids	Alkaloids	7621.2	11373	10400	8062.3	13820	9585.8	11007	9487.4	5588.1	7425.2	11125	5354.4	6857.1	6207.8	4048.1
Indole	Alkaloids	Plumerane	147130	163690	139390	248530	256140	261930	285350	294510	263390	262730	276850	278420	217100	189100	185160
Betaine	Alkaloids	Alkaloids	2135500	2094300	2479500	2025000	2171900	2395600	2243900	2087400	2456100	2699700	2624500	2724600	3147800	2234800	1927600
N-Benzylmethylene isomethylamine	Alkaloids	Alkaloids	7822100	6482600	5243200	4116300	3947200	3537000	4356900	4407800	3202500	4067500	4171600	4291800	4487600	3656500	4371900
Isoquinoline	Alkaloids	Isoquinoline alkaloids	189700	158920	150440	274950	243840	246210	283390	277920	259570	234720	288220	248550	202320	241760	180810
Agmatine	Alkaloids	Alkaloids	48902	42393	45349	41187	47747	43986	37383	34119	29568	51838	52508	44972	32206	27434	28909
6-Deoxyfagomine	Alkaloids	Piperidine alkaloids	4814300	4706300	5427800	3241300	3518800	3071500	1845000	1681700	1553900	1241100	1390200	1247200	2183000	2340800	2148900
N-benzylformamide	Alkaloids	Alkaloids	2918000	2676600	2345400	1098800	1213200	928240	566260	614880	614860	521660	583150	554680	1074600	838860	1029300
Indole-3-carboxaldehyde	Alkaloids	Plumerane	133350	163870	166370	252860	286940	263180	315420	318880	293230	300170	304360	291790	210920	219290	214330
4-Hydroxymandelonitrile	Alkaloids	Phenolamine	15081000	14098000	15544000	9620600	10600000	9086600	4658800	4313500	3708800	2327700	2421500	2379300	7141900	6156000	7274100
2(3H)-Benzothiazolone	Alkaloids	Alkaloids	8952.6	10835	12058	14669	12344	11795	12851	10655	12455	3932.4	3490.5	4857.2	7911.8	8892.4	9934
1-Methyl-6-Oxo-1,6-Dihydropyridine-3-Carboxamide	Alkaloids	Pyridine alkaloids	19712	13273	13375	24455	24935	21417	42702	21349	24542	57295	47486	62019	40405	29864	29256
Daminozide	Alkaloids	Alkaloids	55263	62856	60460	34979	52200	55737	52647	50927	53370	41405	43064	48897	53255	53082	58680
DL-2-Aminoadipic acid	Alkaloids	Alkaloids	9235900	8666900	10272000	3851700	3877200	4333300	2633100	1998200	2389500	964410	794950	811760	5565500	5226200	5273600
4,5,6-Trihydroxy-2-cyclohexen-1-ylideneacetonitrile	Alkaloids	Alkaloids	120960	121640	115100	65729	79992	75662	74555	66918	57331	54881	73668	64565	69001	72665	74124
Candicine	Alkaloids	Phenolamine	22971	29524	36222	35013	39876	31614	38881	43858	36388	4498.5	3778.6	6015.8	19359	22031	18505
N-(2-Hydroxy-4-methoxyphenyl)acetamide	Alkaloids	Phenolamine	12967000	16203000	15950000	6492700	6978700	5737800	4360100	3647300	3261400	3052000	2992800	3116400	6150100	6373400	5461500
3-amino-2-naphthoic acid	Alkaloids	Alkaloids	27119000	24342000	26723000	42015000	46487000	43023000	49446000	50094000	46688000	49220000	46828000	47850000	37986000	37522000	35386000
3-Indoleacrylic acid	Alkaloids	Plumerane	9616000	7851700	9165600	15579000	15589000	17111000	18947000	19877000	18127000	18690000	18467000	18521000	12220000	13414000	14548000
3-Indolepropionic acid	Alkaloids	Plumerane	56638	38046	53385	56467	91599	77179	95258	79561	80067	76682	82721	72240	64244	56983	68713
Spermine	Alkaloids	Alkaloids	18367000	20038000	20066000	17482000	20266000	17102000	18920000	20680000	18545000	19557000	19986000	19199000	19092000	18358000	16646000
1-Methoxy-indole-3-acetamide	Alkaloids	Plumerane	1391200	1618100	1524900	2366000	2697700	2312700	2707000	2884500	2629900	2775000	2721200	2721500	2029800	2088400	2050700
3-Hydroxy-3-acetonyloxindole	Alkaloids	Plumerane	74816	49502	47639	74637	69765	54466	38056	44086	35404	42798	50122	70413	48923	47453	34491
Lumichrome	Alkaloids	Alkaloids	15129	21383	11814	25538	14100	18631	10999	9860.4	16379	12087	18613	15806	17799	21951	12999
Baptifoline	Alkaloids	Quinorisidine alkaloids	1072300	1209700	1147300	1101500	930710	961840	1236000	1075200	1104600	1053400	1161100	1369800	1314500	961960	970580
Stearamide	Alkaloids	Alkaloids	32795	28137	24811	32097	34286	31121	26666	20779	21349	20991	21216	21590	33983	27760	21045
Nicotianamine	Alkaloids	Alkaloids	200520	233980	229080	269030	264430	290390	251970	175830	229730	216110	285420	221320	139060	236910	195190
Vicine	Alkaloids	Alkaloids	51091	89116	90613	68092	116840	114120	56061	75282	47968	120630	118540	128120	73130	93697	81989
N-Oleoylethanolamine	Alkaloids	Alkaloids	118080	105900	101560	19050	28201	24287	38413	36614	29335	282920	288710	262660	106390	97397	76801
10-Formyltetrahydrofolic Acid	Alkaloids	Alkaloids	609320	575750	674190	775490	886060	818600	827470	949330	752120	709600	674250	696370	633130	646180	504150
Genipin	Terpenoids	Monoterpenoids	2479600	2579400	2426500	1793500	2137600	3121100	2689100	3318900	3053600	2442200	2812900	2633800	1987500	2037400	2117800
6,9-Dihydroxy-7-megastigmen-3-one	Terpenoids	Sesquiterpenoids	1271100	1113600	1673100	1103100	1120500	786790	1530400	1678900	1170000	2013600	1096300	1340200	1259300	1078700	870560
Confertifoline	Terpenoids	Sesquiterpenoids	1242000	1288000	1286900	1289600	1310500	1318200	1235100	1340400	1238000	1233000	1232400	1118700	1247100	1145700	1255900
Kaurenoic Acid	Terpenoids	Ditepenoids	10638	9662.3	8195.9	14860	10623	14333	13499	16558	11950	9328.5	8305.2	13252	14163	15414	9869.9
Sweroside	Terpenoids	Monoterpenoids	42505	37625	50279	31131	58496	45687	53826	53866	58357	49400	55002	82613	45700	92057	52024
Ixoroside	Terpenoids	Monoterpenoids	37334	23985	36618	38703	35422	71648	52939	47729	24831	50424	67606	89124	35005	41855	44311
Geniposide	Terpenoids	Monoterpenoids	79720	81058	76439	76007	73500	38675	93667	91802	91713	93667	54595	95771	97685	83588	66309
Cycloartenol	Terpenoids	Triterpene	308330	303390	313890	312830	302350	290680	320960	317510	320900	304640	293370	290280	307940	321360	291160
Soyasapogenol E	Terpenoids	Triterpene	8972.8	8940.2	8689.3	12823	7904.3	12189	6412.5	10260	16112	12188	14760	13592	10285	15051	9740
24,30-Dihydroxy-12(13)-enolupinol	Terpenoids	Triterpene	10712	18432	15206	21276	14106	10542	12146	14396	19602	13169	17954	17199	13539	13429	10255
Betulinic acid	Terpenoids	Triterpene	11799	11628	13516	13760	13164	11188	13132	11960	16326	13475	13321	15914	8740	11490	14162
Soyasapogenol B	Terpenoids	Triterpene	1427200	1287700	1256000	1299500	1265100	1266300	1354500	1318400	1298600	1305300	1274300	1312000	1472800	1328400	1273200
Soyasapogenol B-3-O-glucuronide	Terpenoids	Triterpene Saponin	29782	26095	22597	18813	28111	27545	39681	57219	39269	48927	46915	55356	32067	33364	38930
Oleanolic acid-3-O-xylosyl(1→3)glucuronide	Terpenoids	Triterpene Saponin	54103	58747	49016	31091	49959	44772	68818	85534	66648	71111	78384	74793	51979	62148	60015
Soyasaponin IV	Terpenoids	Triterpene Saponin	31614	42567	41127	24744	29459	30290	44947	43799	26931	45552	47333	69293	36499	28842	34412
Soyasaponin βb'	Terpenoids	Triterpene Saponin	411880	397960	390750	308060	305510	365910	377030	366290	332460	415940	458620	444440	299680	345660	302000
Soyasaponin III	Terpenoids	Triterpene Saponin	405800	432710	373080	289360	268230	334710	339940	363140	293840	427120	412700	429360	319930	335330	334600
Soyasaponin γa	Terpenoids	Triterpene Saponin	1997800	1918900	2132100	1796300	2501500	1973300	3454700	3276900	3167000	2579200	3172000	3106800	2525900	2333800	2775000
Soyasaponin βc	Terpenoids	Triterpene Saponin	102100	104270	120150	89604	95678	72948	185680	181470	174470	218010	218810	217890	147140	135960	110980
Soyasaponin II	Terpenoids	Triterpene Saponin	55936	48585	53362	34621	55958	46366	64003	62622	58736	68870	81580	86586	62928	58567	64385
Soyasaponin γg	Terpenoids	Triterpene Saponin	12001000	11937000	11904000	10790000	10814000	10994000	12615000	12935000	10406000	11450000	11548000	12424000	9724700	10152000	10228000
Soyasaponin II Methyl Ester	Terpenoids	Triterpene Saponin	27617	22766	19685	17488	19967	22480	23737	24432	17811	21330	26597	21829	23763	21547	18650
Dehydrosoyasaponin I	Terpenoids	Triterpene Saponin	91457	81645	84262	107300	115960	97102	100310	100280	70301	96044	80004	102300	82238	83521	83625
Soyasaponin βe	Terpenoids	Triterpene Saponin	134820	148280	138490	152040	140810	127590	150300	130150	136900	184440	172360	177240	144740	130320	172750
Soyasapogenol E-3-O-rhamnosyl(1,2)glucosyl(1,2)glucuronide	Terpenoids	Triterpene Saponin	146730	156260	156690	130340	137770	135490	150410	116520	130930	175160	142030	189290	139390	111340	150950
Soyasaponin βb (Soyasaponin I)	Terpenoids	Triterpene Saponin	509700	448560	444440	342360	475720	403600	415730	513210	365500	587120	480700	589360	411680	386830	386590
Soyasaponin βd	Terpenoids	Triterpene Saponin	62069	50954	39043	51412	58431	44750	49322	65733	35544	47816	44625	86840	25344	40261	54175
Soyasaponin βa (Soyasaponin V)	Terpenoids	Triterpene Saponin	55635	47123	49979	50121	51106	58687	59878	77023	38475	63493	46624	78708	41085	41749	47644
Hederagenin-3-O-glucuronide-28-O-glucosyl(1,2)glucoside	Terpenoids	Triterpene Saponin	14151	15293	10820	15527	10639	10489	24973	18719	13314	6873	7603.9	15837	14441	10892	9844.4
Azukisaponin IV	Terpenoids	Triterpene Saponin	16986	16633	17742	20404	19948	10960	24931	28008	26016	13208	14394	8480	15009	23377	20491
Soyasaponin βα	Terpenoids	Triterpene Saponin	578780	490080	487150	395940	572970	529890	696580	682490	776940	687340	829120	686570	543090	515170	571270
Soyasaponin βg (Soyasaponin VI)	Terpenoids	Triterpene Saponin	4090900	4311200	4137600	3995300	3703300	4245500	4732200	4578200	4325900	4423100	4170100	3774100	3584300	3879500	4201300
Soyasaponin αg	Terpenoids	Triterpene Saponin	1108100	993790	685800	976070	948930	1013600	1228100	1105700	995190	933130	708320	1305800	880570	939640	968590
AcetylSoyasaponin A3	Terpenoids	Triterpene Saponin	53223	55756	72018	44695	72142	56398	33437	38773	44985	41476	29187	33320	48143	37110	46589
Soyasaponin Ah	Terpenoids	Triterpene Saponin	6356.2	6874.4	7500.2	4462.3	7900.5	5353.4	5245.5	4994.7	5385.9	2844	3723.2	3882.9	4970.3	4467.1	4899.2
Succinic anhydride	Organic acids	Organic acids	508140	572360	565510	438540	482230	356030	726150	662280	574710	103590	117240	115160	436760	403710	384670
1-Aminocyclopropane-1-carboxylic acid	Organic acids	Organic acids	841610	653690	689800	321370	314570	321230	283600	292070	327290	202290	188330	160130	575350	422160	389380
2-Aminoisobutyric acid	Organic acids	Organic acids	14349000	13995000	13382000	11027000	11628000	11524000	12115000	11673000	10852000	8551400	9371200	8500800	11920000	11224000	10517000
γ-Aminobutyric acid	Organic acids	Organic acids	4177900	4220600	4596100	1884800	1694800	1808300	1973400	1879900	1870000	1117600	1018200	1043500	2621500	2235200	2259700
Hydroxypyruvic acid*	Organic acids	Organic acids	103400	74992	93576	57633	46931	43358	103020	102330	120670	67265	94240	80427	79006	107430	106830
Tartronate semialdehyde*	Organic acids	Organic acids	76449	102700	114330	64184	43133	77013	147030	137590	88738	74218	87738	89427	93626	89226	90722
Creatinine	Organic acids	Organic acids	14814	21317	19357	15387	14879	14447	16101	10867	12144	18012	18715	13269	18575	18685	11381
N-Methyl-4-aminobutyric acid	Organic acids	Organic acids	122350	125480	158730	141060	207870	212290	174840	142040	120810	275290	268440	245010	192670	180830	149800
5-Aminovaleric acid	Organic acids	Organic acids	221340	209540	221510	157520	194330	197210	214030	181040	187270	186590	138460	143720	178000	181370	175410
Succinic acid*	Organic acids	Organic acids	42957000	45269000	41255000	29449000	31541000	28686000	39610000	41166000	37772000	7347700	7787900	7653000	28509000	27479000	27952000
D-Erythronolactone	Organic acids	Organic acids	70093	41165	56245	33334	33251	24669	53066	52510	40697	9	9	9	42733	34574	22689
Methylmalonic acid*	Organic acids	Organic acids	44259000	44058000	40686000	26318000	31213000	29961000	41657000	40462000	37327000	7187700	7617400	7648600	27002000	28339000	27516000
β-Hydroxyisovaleric acid	Organic acids	Organic acids	108460	81734	107700	81745	99736	117190	118480	152690	136270	145370	128070	169370	92218	110960	106870
Aminomalonic acid	Organic acids	Organic acids	1405000	1416300	1471600	1001700	1142400	985400	1380300	1364500	1266600	229200	190390	272710	834460	944900	863720
2-Picolinic acid	Organic acids	Organic acids	518620	466950	405090	425350	552220	449330	394470	359230	325030	111940	108840	81823	319100	330490	278890
Imidazole-4-Acetic Acid*	Organic acids	Organic acids	268240	334770	315710	373950	447850	486310	487190	399580	462000	674270	631360	555800	554330	521680	440950
Imidazol-1-yl-acetic acid*	Organic acids	Organic acids	326790	297920	223330	373650	435320	456070	646910	384650	515630	621860	526200	454480	635640	342800	398140
L-Pipecolic Acid	Organic acids	Organic acids	21024000	19995000	19419000	10745000	10448000	10747000	9327400	7796700	9682500	5733700	5958400	6009200	13275000	12261000	12857000
Citraconic acid	Organic acids	Organic acids	1448900	907050	812090	1351600	799420	1283100	1034800	1373200	1741900	1408300	1410100	1331800	1306600	1120600	994120
3-Guanidinopropionic acid	Organic acids	Organic acids	69048	77009	74917	84105	101070	102940	94969	95639	107730	164240	149070	132960	97281	98099	107200
6-Aminocaproic acid	Organic acids	Organic acids	938860	1701500	1881500	1193700	689130	1012600	447640	434090	230320	399960	155390	339890	1136500	947210	679410
Dimethylmalonic acid*	Organic acids	Organic acids	160250	165120	155000	176160	195100	190000	164550	186360	182110	207630	213450	233740	158860	160740	163710
Glutaric acid	Organic acids	Organic acids	109100	87643	110560	95339	106690	126090	51703	57782	58282	137450	120810	131810	84784	85549	83245
2-Hydroxy-2-methyl-3-oxobutanoic acid	Organic acids	Organic acids	186250	183930	181380	202090	227410	198650	199870	214220	176830	275950	236070	227800	174490	175890	181260
2-Methylsuccinic acid*	Organic acids	Organic acids	2153600	2066100	1949400	2092700	2258900	2277700	2194900	2173600	2086500	2618900	2590900	2645000	1975000	1961100	1995300
3-Ureidopropionic Acid	Organic acids	Organic acids	536370	496160	531110	258720	269900	258210	116800	126430	133860	17488	18534	13028	234230	199920	218840
2-Hydroxyisocaproic acid	Organic acids	Organic acids	59802	70869	73415	101790	135240	83071	42963	50721	45458	289210	353810	342460	113580	116180	114200
6-Hydroxyhexanoic acid	Organic acids	Organic acids	9	9	9	12694	13507	12278	26823	19734	35060	67280	48391	40510	28047	18934	28504
Iminodiacetic acid	Organic acids	Organic acids	1599300	1870400	1794100	1139300	1130500	1347500	909040	859030	952470	282630	293240	263680	946170	942440	1046000
L-Malic acid*	Organic acids	Organic acids	96085000	91540000	97983000	43431000	42944000	44757000	73927000	75301000	71422000	13237000	13907000	12052000	58866000	56160000	60079000
2-n-Propyl-4-pentenoic acid	Organic acids	Organic acids	569310	606500	574140	686780	625330	664320	487990	528880	552930	609700	590530	600640	570720	658510	627230
2-n-Propyl-2-pentenoic acid	Organic acids	Organic acids	519020	513280	567420	590200	558720	573440	444150	458930	495200	573180	538700	528640	517140	537900	641950
1-Methylpiperidine-2-carboxylic acid	Organic acids	Organic acids	188490	148600	133220	202330	212660	174480	289850	309090	359940	453270	534360	462630	302710	358970	346120
2,3-Dimethylsuccinic acid	Organic acids	Organic acids	11293	9080.1	5264.2	21329	31941	20833	26568	20460	23841	102000	129030	88178	35342	31067	35732
Valproic Acid	Organic acids	Organic acids	756540	783290	789790	752300	793710	789400	753740	780440	754200	669120	657400	674910	722440	701710	736030
4-Acetamidobutyric acid	Organic acids	Organic acids	25481	40957	37987	73325	97247	77085	29185	35682	17626	55721	74644	77563	49891	61176	48533
4-Guanidinobutyric acid	Organic acids	Organic acids	1092700	963080	1012300	1046500	1274400	1239300	1139700	946360	930160	1008200	1145600	1081000	987850	836630	927280
2-Methyl-3-oxosuccinic acid	Organic acids	Organic acids	32535	40000	21973	51317	36108	14597	35969	27172	30282	31867	27319	25336	27512	29508	28177
α-Ketoglutaric acid	Organic acids	Organic acids	418670	360530	366570	413180	329300	410150	336360	334670	290750	253510	298040	276680	457150	357730	437270
2,2-Dimethylsuccinic acid	Organic acids	Organic acids	167870	165370	186630	58192	58998	49761	33226	25683	31033	9	9	9	57086	54646	66124
Adipic Acid*	Organic acids	Organic acids	98216	87667	100970	147200	112010	118300	77166	83312	100380	313570	407460	349500	150960	155100	176960
2-Methylglutaric acid*	Organic acids	Organic acids	132870	67836	80461	146620	132390	125310	92122	71808	90710	250820	265220	317350	121690	102780	99982
2-Hydroxyglutaric Acid*	Organic acids	Organic acids	534440	473850	370320	568090	577910	606580	492180	516650	488510	632380	692000	658710	526610	497960	558500
L-Citramalic acid	Organic acids	Organic acids	114200	146160	151580	177430	185150	184910	184810	183810	146960	187120	199060	197710	160850	163880	199910
3-Methylmalic acid*	Organic acids	Organic acids	410940	413620	381920	469070	528490	499960	351030	491740	418860	611590	570840	565340	412810	414370	450360
Mevalonic acid	Organic acids	Organic acids	9	68879	56498	72488	67170	88871	71931	94661	97704	96568	88481	50725	80802	75097	63834
L-Tartaric acid	Organic acids	Organic acids	192340	200870	236400	87253	80578	98319	123680	136650	114790	164070	182510	135740	144380	181160	112070
Benzyl acetate	Organic acids	Organic acids	140860	171760	124960	194120	172730	179240	139320	152210	145770	178810	175790	186130	65291	76643	83821
cis-Citral	Organic acids	Organic acids	45638	33716	39747	43422	37129	38662	49179	43406	44586	46614	41950	39447	37706	33842	43277
5-Acetamidopentanoic Acid	Organic acids	Organic acids	143200	147680	142450	188900	201950	201940	186620	183600	161980	256990	269340	222930	166040	167620	154130
2-Oxoadipic acid	Organic acids	Organic acids	41533	28804	42249	25682	28246	25376	46944	56407	44536	19189	20044	19768	35516	28459	25442
2-Propylsuccinic acid*	Organic acids	Organic acids	59582	68607	61149	43302	43019	47530	68000	51458	38411	25854	31703	25035	44702	39698	43792
Pimelic acid*	Organic acids	Organic acids	55015	44582	46976	75310	65126	62148	50079	49716	49017	29515	28644	49044	52909	46260	47453
2-Isopropylmalic Acid	Organic acids	Organic acids	781180	830670	697290	621830	732510	597760	2330700	2172300	1805000	1193000	1183700	1206700	1038600	950740	897510
2-Propylmalic Acid*	Organic acids	Organic acids	753790	792190	715800	719790	780190	739220	2200000	2306600	1903700	1156500	1123200	1176300	1026300	928040	994140
3-Isopropylmalic Acid*	Organic acids	Organic acids	801100	767410	772820	649710	775900	717810	2152500	2179700	1865000	1121600	1092000	1168900	1051800	958210	1042000
D-Glucono-1,5-lactone	Organic acids	Organic acids	64815	58456	61464	69139	72900	65943	73208	58238	77770	66424	66031	68545	52577	85254	61035
Azelaic acid	Organic acids	Organic acids	1046800	995680	932410	185630	275860	227250	205290	140580	137140	237280	255610	222160	347530	302240	326610
2,6-Diaminooimelic acid	Organic acids	Organic acids	511050	441270	467170	570890	701110	628830	1805000	1470600	1739200	1857200	1632500	1792800	1198100	947830	1044100
Isocitric Acid	Organic acids	Organic acids	10550000	8547600	8783900	11691000	9378300	10117000	8806400	9503800	9844200	13127000	11542000	10757000	9927500	10149000	8582700
Citric Acid	Organic acids	Organic acids	30351000	31918000	31132000	33475000	39122000	36503000	33500000	33088000	32122000	35535000	35238000	32818000	32190000	30826000	32544000
Quinic Acid	Organic acids	Organic acids	984880	996620	943170	1084400	865880	1173100	927360	1091000	1026000	971320	1220500	1029300	1043000	1007300	982470
4,8-Dihydroxyquinoline-2-carboxylic acid	Organic acids	Organic acids	21535	31578	7547.4	25896	35717	32685	38554	27533	35807	32581	27680	24044	37741	22983	41811
Lipoic acid	Organic acids	Organic acids	235.11	86.547	570.84	176.26	567.32	89.199	191.35	92.259	184.52	90.933	92.106	175.64	179.93	91.086	176.36
2-Hydroxyhexadecanoic acid	Organic acids	Organic acids	68496	68363	60049	77939	111120	83492	104280	80510	60377	107520	100980	111730	50600	55055	58753
10-Undecenoic acid	Lipids	Free fatty acids	25213	19553	22205	26180	27467	24595	21863	25383	22119	20407	25327	22571	27470	25394	27444
Undecylic Acid	Lipids	Free fatty acids	306800	267060	293730	287700	278130	265370	308450	304350	282700	269570	270600	224880	236760	269220	311410
Dodecanoic acid (Lauric acid)	Lipids	Free fatty acids	51543	63273	60370	62571	62415	60074	70910	67611	59741	43061	42019	39756	55671	48014	54274
Myristic Acid	Lipids	Free fatty acids	6460200	6584600	6319900	6561500	7727600	6144900	7386600	6330800	5510200	9131300	5710300	4875400	4070600	4214100	4430300
Palmitaldehyde	Lipids	Free fatty acids	52359000	55419000	57478000	67851000	52635000	51459000	58726000	62647000	83737000	49815000	52028000	52699000	44932000	44486000	46149000
Pentadecanoic Acid	Lipids	Free fatty acids	143940	132350	135930	127090	185340	152520	153440	118750	90673	123310	124470	121950	98248	107870	113100
13-methylmyristic acid	Lipids	Free fatty acids	64969	59477	50243	50539	42339	42149	43274	36433	23814	26494	28774	28488	33824	38872	44864
Tridecanedioic acid	Lipids	Free fatty acids	32973	25152	20943	24122	23716	24749	28439	25837	17731	18488	26480	18797	23539	24030	27517
Choline Alfoscerate	Lipids	PC	554490	596020	515200	3377200	3876600	3815200	549690	607230	576080	2982000	3071900	3284300	2399200	2324900	2151000
1,14-Tetradecanedioic Acid	Lipids	Free fatty acids	10929	8638	15350	9453.1	11053	12976	10263	10190	8725.9	9392.5	10381	12310	8761.3	9307.2	12238
10-Heptadecenoic Acid	Lipids	Free fatty acids	454070	598240	648660	255570	272670	305760	232710	253830	197280	194710	154270	181610	275150	246580	257330
Octadeca-11E,13E,15Z-trienoic acid	Lipids	Free fatty acids	4116400	4147400	3978000	3860000	4176900	3928300	3967600	4175300	4025700	3969500	4060400	3815600	4287500	3878800	3601200
Crepenynic acid	Lipids	Free fatty acids	104980	112220	109570	38991	35153	40810	25564	29456	27547	12115	11381	9989.6	39942	41006	42541
γ-Linolenic Acid*	Lipids	Free fatty acids	75921000	79945000	82034000	35100000	36913000	36101000	27725000	28760000	25294000	12019000	11713000	11275000	37791000	36786000	37679000
α-Linolenic Acid*	Lipids	Free fatty acids	71648000	74289000	78531000	32232000	34192000	33285000	24886000	25859000	23831000	11133000	10881000	10261000	33999000	33791000	35080000
Punicic acid (9Z,11E,13Z-octadecatrienoic acid)	Lipids	Free fatty acids	510940	671330	631660	101290	154010	131320	146540	127120	118010	1239200	405690	385790	318940	322370	320190
Linoleic acid	Lipids	Free fatty acids	65434000	71498000	73951000	22607000	28597000	28520000	22068000	25662000	19239000	38897000	38789000	40267000	36203000	35665000	38126000
(9Z,11E)-Octadecadienoic acid	Lipids	Free fatty acids	39298	44526	42122	12291	15558	15078	11115	12383	9502.4	18754	20618	22171	16334	19978	22661
Oleamide (9-Octadecenamide)	Lipids	Free fatty acids	34506	25114	21932	31312	30365	29479	29447	24294	22543	30063	27429	24790	29783	25134	17651
Petroselinic acid	Lipids	Free fatty acids	16737000	19364000	19487000	7727300	8527000	8219900	20063000	18443000	17794000	7833700	6526000	6794600	11909000	15091000	15844000
Elaidic Acid	Lipids	Free fatty acids	62804000	69433000	71009000	29705000	31535000	30149000	72373000	71026000	65367000	27984000	26875000	25467000	45267000	45295000	47805000
11-Octadecanoic acid(Vaccenic acid)	Lipids	Free fatty acids	13753000	15164000	15877000	5773300	6961600	6898700	16639000	16191000	15524000	5738800	5028700	5138200	9913000	9397100	10174000
Hexadecanedioic acid	Lipids	Free fatty acids	7091.9	7658.1	9235.6	8785.1	9189.2	10488	8692.3	7118.3	8389.6	12959	14773	12127	8621.1	7499.7	9233.5
9-Hydroxy-10,12,15-octadecatrienoic acid*	Lipids	Free fatty acids	16949	15709	16082	2782	3816.7	2503.2	9	9	9	4208.9	1620.2	9	5762.2	4216.3	4616.5
17-Hydroxylinolenic acid	Lipids	Free fatty acids	63645	59948	59252	9	9	9	9	9	9	1050500	289190	280300	133820	122830	132790
13-Hydroxy-6,9,11-octadecatrienoic acid	Lipids	Free fatty acids	9801	8849.2	11241	15480	15068	16788	14555	14271	14433	14427	11784	12472	7640	8733.7	7431.6
13S-Hydroxy-9Z,11E,15Z-octadecatrienoic acid	Lipids	Free fatty acids	19292	20414	19394	5833.7	6165.9	4610.8	2174.6	1491.3	2646.5	43944	29151	32410	10865	14448	12026
13-KODE; (9Z,11E)-13-Oxooctadeca-9,11-dienoic acid*	Lipids	Free fatty acids	14468	14160	10806	3536	4302.1	3059.4	9	9	9	3011.7	9	9	4755.1	4306.5	4016.2
9S-Hydroxy-10E,12Z-octadecadienoic acid*	Lipids	Free fatty acids	117940	128950	127450	23078	27843	21871	25660	27980	19992	337730	113350	117220	76574	71236	73477
13(S)-HODE;13(S)-Hydroxyoctadeca-9Z,11E-dienoic acid*	Lipids	Free fatty acids	116880	121190	131240	20792	22959	23958	23830	24583	21905	357720	112290	119200	71010	73772	78254
9(10)-EpOME;(9R,10S)-(12Z)-9,10-Epoxyoctadecenoic acid	Lipids	Free fatty acids	37225	33782	41931	2440.9	3302.6	3057.4	9	9	9	16619	5612.3	7886.9	11337	9818.9	11522
12,13-Epoxy-9-Octadecenoic Acid	Lipids	Free fatty acids	21195	21941	18526	1981.5	9	1506.1	2196.2	9	9	9301.6	2345.3	3001.3	6178.2	6716.6	5938.4
Ricinoleic acid	Lipids	Free fatty acids	383540	385740	502830	162180	172810	215000	177630	220390	166830	129910	102430	97309	164510	191710	174610
1-Eicosanol	Lipids	Free fatty acids	499920	610770	660580	228940	153740	175700	254930	315720	283580	126670	88710	107950	195790	267570	224860
1-Monomyristin	Lipids	Free fatty acids	141860	152060	149990	110410	137960	110140	123470	137800	130050	96886	83231	86685	68217	64663	52791
13(s)-hydroperoxy-(9z,11e,15z)-octadecatrienoic acid	Lipids	Free fatty acids	124410	122250	119450	123810	148300	114560	134930	118600	106960	169860	110320	103680	77252	81180	78978
5S,8R-DiHODE; (5S,8R,9Z,12Z)-5,8-Dihydroxyoctadeca-9,12-dienoate	Lipids	Free fatty acids	22316	24657	22987	5107.4	6625.2	4528.8	9	9	9	40819	18031	15835	11387	9421.3	13723
9-Hydroxy-12-oxo-15(Z)-octadecenoic acid	Lipids	Free fatty acids	28738	24557	24704	9	9	9	9	9	9	40743	14981	12819	9723.5	8744.1	9188.6
Hydroxy ricinoleic acid	Lipids	Free fatty acids	11057	13222	14411	9	9	9	1309.8	9	9	52825	14391	16550	7942.1	10019	8960.8
Ethyl 9-Hydroxy-10,12-octadecadienoic acid	Lipids	Free fatty acids	18698	19785	15572	3426.2	4150.4	4364.6	6119	4233.1	5584.1	44358	43708	44134	17068	16815	14286
9,12,13-Trihydroxy-10,15-octadecadienoic acid	Lipids	Free fatty acids	31577	25101	22464	8568.6	6005.6	5140.8	8799.9	8595.9	6498.5	9	9	9	11141	11548	8473.4
9,10,13-Trihydroxy-11-Octadecenoic Acid	Lipids	Free fatty acids	135950	140820	140590	13717	14894	15374	8922.1	9882	8046.6	129360	49588	42648	50657	46865	49655
9,10-Dihydroxy-12,13-epoxyoctadecanoic acid	Lipids	Free fatty acids	6254.9	7902.5	5883.1	9	9	9	9	9	9	41035	17066	21228	6109.8	8791	6563.9
9,12,13-TriHOME; 9(S),12(S),13(S)-Trihydroxy-10(E)-octadecenoic acid	Lipids	Free fatty acids	196070	208380	197020	19407	24504	21342	13576	11361	15956	183930	66770	69700	57662	68107	65352
Monopalmitin	Lipids	Glycerol ester	1476400	1447600	1316900	1412000	1068000	1039200	1263900	1231600	1400300	1054200	1028300	956850	1473100	1225500	982530
2-α-Linolenoyl-glycerol	Lipids	Glycerol ester	445520	427660	439130	206930	226220	191680	209070	200400	168860	21213	20749	17063	196310	191750	130160
1-α-Linolenoyl-glycerol	Lipids	Glycerol ester	2076100	2030500	2138400	871520	872170	767730	699310	696610	632140	29300	25191	24050	833720	762580	602660
2-Linoleoylglycerol	Lipids	Glycerol ester	180900	216250	200770	80897	97128	65556	108430	113970	104560	39958	37658	41203	103880	94088	66682
1-Linoleoylglycerol	Lipids	Glycerol ester	756160	770190	776410	176230	164830	154490	209570	223090	212260	43683	38403	35683	306620	265280	170300
1-Oleoyl-Sn-Glycerol	Lipids	Glycerol ester	25911	27648	20433	26778	29591	28049	18760	20009	12038	13657	13016	13788	20136	16599	20994
LysoPE 14:0	Lipids	LPE	4692.7	3064.1	7344.8	5023.4	4674.2	2044.8	5393.4	1580.8	3433.1	71507	59309	60551	9309.2	17917	14804
LysoPE 15:0	Lipids	LPE	10780	14767	12213	4710.2	6205.9	6928.3	5579.7	6892.3	5133.7	73966	64464	58408	27115	22368	17334
LysoPE 16:0	Lipids	LPE	1418400	1541900	1354800	636460	752840	749390	1051400	986930	950910	9037000	9429900	9997600	2724900	2828700	2700800
LysoPE 16:0(2n isomer)	Lipids	LPE	290680	289030	265270	161100	151510	131870	206820	189160	250040	1949300	1933300	1949900	670030	720960	630920
LysoPC 14:0	Lipids	LPC	19970	20614	24815	22489	15601	16959	23287	23879	20258	168420	166470	169090	53624	48260	45429
LysoPE 18:3(2n isomer)	Lipids	LPE	517410	577770	493050	411670	324240	414820	342190	388040	373440	521310	517750	495650	430180	372370	385250
LysoPE 18:3	Lipids	LPE	797330	871580	748730	330440	297490	295760	517670	521310	457120	652280	665270	708330	525820	498420	472960
LysoPE 18:2(2n isomer)	Lipids	LPE	1647100	2398700	2118200	1653600	1754600	1615100	1678900	1803600	1522000	11755000	11943000	11236000	3461300	3207400	3360100
LysoPE 18:2	Lipids	LPE	1411600	1629500	1626900	904310	828210	884030	916470	1025200	948180	6627600	7168200	7244600	2496100	2648800	2417100
LysoPE 18:1	Lipids	LPE	488500	510720	510970	286670	315960	252860	191230	237810	228940	1603200	1660700	1587600	582950	633980	613900
LysoPE 18:1(2n isomer)	Lipids	LPE	415530	547210	461490	258310	291060	268180	200300	203090	188350	2218400	2273500	2192200	666580	613100	598210
LysoPC 15:0	Lipids	LPC	13566	20716	23205	15351	12681	16079	11753	10541	11028	118540	137740	92865	33334	29354	30515
LysoPE 18:0	Lipids	LPE	68673	62885	63752	33992	27020	29916	39467	33171	38048	144660	150720	139300	83895	73317	67786
LysoPC 16:1(2n isomer)	Lipids	LPC	22126	33908	20982	41656	37219	37529	27405	21553	29050	113910	85072	96634	48503	36128	43027
LysoPC 16:1	Lipids	LPC	32267	46005	38654	30850	33477	29272	48301	45700	49588	114810	108860	89074	61339	51516	55038
LysoPC 16:0(2n isomer)	Lipids	LPC	567740	632070	584670	392490	422690	427140	552600	575630	506420	2665600	2003700	2629200	954830	935010	1122200
LysoPC 16:0	Lipids	LPC	4046400	4784300	3882400	2905700	2923600	2544400	3317700	3417600	3216400	20942000	22228000	19552000	5723100	6654900	7113400
LysoPC 17:1	Lipids	LPC	22816	32709	27636	15000	24215	22898	19618	16897	13130	35115	46737	52158	22089	15984	19888
2-α-Linolenoyl-glycerol-1-O-glucoside	Lipids	Glycerol ester	10929	8731.8	9572.6	2061.7	1838.8	3531.7	3069.5	6510.3	2456.6	9	9	9	6890	4800	4373.3
1-α-Linolenoyl-glycerol-3-O-glucoside	Lipids	Glycerol ester	10342	13376	14154	4590.4	2677.6	4922.5	7056.3	6894.2	8288.7	9	9	9	5176.7	6373.8	6963.8
LysoPC 18:3	Lipids	LPC	3962600	4176700	4202200	2562100	2238300	2146200	3975300	3532600	3306000	3132700	3212500	3456900	2600300	3000900	2776200
LysoPC 18:3(2n isomer)	Lipids	LPC	2141200	2446600	2459100	1959700	1959400	1837100	2433100	2369400	2336600	1698100	1737700	1691600	1631000	2144700	2182100
LysoPC 18:2(2n isomer)	Lipids	LPC	7803000	9282600	6955600	10997000	11187000	9798200	12547000	12019000	10989000	16815000	16341000	16974000	11099000	12906000	11980000
LysoPC 18:2	Lipids	LPC	11991000	12267000	12446000	11353000	11354000	11053000	14221000	16481000	14081000	27034000	28547000	27771000	13449000	12791000	15858000
LysoPC 18:1	Lipids	LPC	5756700	6444000	6261400	4842300	5000700	5140100	5278200	4812000	4390200	4685100	5363100	5342400	4732200	4229600	5017200
LysoPC 18:1(2n isomer)	Lipids	LPC	3200400	3416000	3345300	2245500	2369900	2432600	2250100	2110700	2045500	1856600	2025600	2007700	2313100	2263900	2396900
LysoPC 18:0(2n isomer)	Lipids	LPC	70412	66445	66729	37610	47204	48175	52500	47817	59488	169490	173860	192770	74427	95208	89836
LysoPC 18:0	Lipids	LPC	306390	367840	311440	225370	194390	251700	202070	207020	201870	1046700	901200	947700	300760	383020	381200
LysoPC 19:0	Lipids	LPC	25839	28158	29054	18418	15192	28634	33826	27917	37369	18792	13506	24913	15773	26214	23644
LysoPC 20:2	Lipids	LPC	8800.1	12152	11634	6619.5	8930.8	7848.9	13631	7243.4	10152	46734	41727	40492	14925	12337	17251
LysoPC 20:2(2n isomer)	Lipids	LPC	13287	10670	13127	7075.4	6212.2	6898.4	11765	13638	7078.7	37013	33459	42973	17306	16113	15134
