# Supplementary material for: Combined Metabolomic and Quantitative RT-PCR Analyses Revealed the Synthetic Differences of 2-Acetyl-1-pyrroline in Aromatic and Non-Aromatic Vegetable Soybeans
Source: Int J Mol Sci. 2022 Nov 22;23(23):14529. doi: 10.3390/ijms232314529 (PMC9738111; doi:10.3390/ijms232314529)
Supplement: Supplementary file 1 [file ijms-23-14529-s001.zip › ijms-1956011-supplementary/Table S2.xlsx]

## Sheet: Sheet1
Table S2 differential accumulation metabolites (DAMs) in ZX8-S5 and ZK1754-S5 (* indicates the racemates)
Compounds	Class	ZX8-S5	ZK1754-S5	VIP	p_value	Fold_Change	Type
L-Proline	Amino acids and derivatives	2.90877e+07	1.05332e+07	1.26282	0.000475583	0.362118	down
L-Valine	Amino acids and derivatives	5.66023e+07	2.62373e+07	1.26742	0.00030447	0.463538	down
L-Homoserine*	Amino acids and derivatives	1.55647e+06	749573	1.21787	0.0087435	0.481586	down
L-Leucine*	Amino acids and derivatives	23079000	7.20143e+06	1.27497	9.71794e-05	0.312034	down
L-Norleucine	Amino acids and derivatives	1.81767e+06	580477	1.27562	8.23061e-06	0.319353	down
L-Isoleucine*	Amino acids and derivatives	1.10957e+07	3.02943e+06	1.2532	0.000581557	0.273029	down
L-Asparagine	Amino acids and derivatives	9.18657e+06	3.08193e+06	1.23351	0.0307464	0.335483	down
L-Ornithine	Amino acids and derivatives	80612.3	17967.3	1.25951	0.0180239	0.222886	down
S-Methyl-L-cysteine	Amino acids and derivatives	1.28513e+06	280070	1.25584	0.000101251	0.217931	down
L-Cyclopentylglycine	Amino acids and derivatives	284593	140157	1.15864	0.00738908	0.49248	down
L-threo-3-Methylaspartate	Amino acids and derivatives	4.70297e+06	1.33423e+06	1.27527	0.000729565	0.2837	down
L-Methionine	Amino acids and derivatives	14068000	3.85847e+06	1.26488	0.0124321	0.274273	down
N-Methyl-L-Glutamate	Amino acids and derivatives	58251.7	6388.27	1.27328	4.34378e-05	0.109667	down
N-α-Acetyl-L-ornithine	Amino acids and derivatives	1.65633e+06	410120	1.27642	0.000339898	0.247607	down
L-Arginine	Amino acids and derivatives	7828300	2859900	1.26894	0.00215512	0.365328	down
L-Tyrosine	Amino acids and derivatives	27179000	6.56147e+06	1.27176	1.09915e-05	0.241417	down
Homoarginine	Amino acids and derivatives	485480	182527	1.21779	0.00146292	0.375972	down
N-Monomethyl-L-arginine	Amino acids and derivatives	2.11953e+06	777623	1.25401	0.00657432	0.366884	down
5-Hydroxy-L-tryptophan	Amino acids and derivatives	49009	101186	1.21941	0.00279911	2.06464	up
L-Glycyl-L-phenylalanine	Amino acids and derivatives	468630	1.43327e+06	1.2637	0.00407703	3.05842	up
N-Acetyl-L-tyrosine	Amino acids and derivatives	14066.7	6448.2	1.06429	0.0565032	0.458403	down
Glycyl-tryptophan	Amino acids and derivatives	678973	1.65927e+06	1.25311	0.00106228	2.44379	up
γ-glutamylmethionine	Amino acids and derivatives	187553	86806.7	1.2509	0.000904583	0.462837	down
γ-Glutamylphenylalanine	Amino acids and derivatives	2.02783e+06	9543200	1.2696	0.00242065	4.70611	up
Tryptophan glutamic acid	Amino acids and derivatives	32228.7	11415.2	1.20051	0.0306013	0.354195	down
Cinnamic acid	Phenolic acids	2.99483e+06	1.43383e+06	1.2693	0.000525705	0.478769	down
Hydroxyphenyllactic acid	Phenolic acids	18153.3	7812.6	1.16609	0.0487595	0.430367	down
Methyl caffeate	Phenolic acids	27220.7	102625	1.24622	0.0012164	3.77011	up
1-O-Salicyl-D-glucose	Phenolic acids	295917	115037	1.25871	0.000241013	0.388749	down
1-O-Vanilloyl-D-Glucose	Phenolic acids	289837	701257	1.26526	0.000395087	2.41949	up
Vanillic acid-4-O-glucoside	Phenolic acids	8983.07	23212	1.09579	0.0199844	2.58397	up
2,4,6-trihydroxy-acetophenone-4-O-β-D-glucopyranoside	Phenolic acids	1.09103e+06	2.67167e+06	1.26133	0.000146044	2.44875	up
3,4,5-Trimethoxyphenyl-1-O-Glucoside	Phenolic acids	3055400	8.27397e+06	1.2736	0.00291678	2.70798	up
4-O-Glucosyl-sinapate	Phenolic acids	56918	27733	1.18169	0.0269931	0.487245	down
Hydrangeifolin I	Phenolic acids	38007.7	81395.7	1.21586	0.00180917	2.14156	up
1-Methyladenine	Nucleotides and derivatives	252403	89168.3	1.27112	0.00412854	0.353277	down
Isoguanine	Nucleotides and derivatives	433063	142337	1.25817	0.00108058	0.328674	down
6-O-methylguanine	Nucleotides and derivatives	64361	18751.7	1.27183	0.00490847	0.291351	down
Thymidine	Nucleotides and derivatives	30032.7	2209.6	1.02104	0.0165852	0.0735732	down
1-beta-D-Arabinofuranosyluracil	Nucleotides and derivatives	130347	334617	1.26544	0.000233569	2.56713	up
Uridine	Nucleotides and derivatives	116940	316060	1.24355	0.00271249	2.70275	up
2'-Deoxyguanosine	Nucleotides and derivatives	46516	15420.7	1.2396	0.00115515	0.331513	down
Xanthosine	Nucleotides and derivatives	802363	1.81417e+06	1.27298	0.00203273	2.26103	up
N7-Methylguanosine	Nucleotides and derivatives	26129.3	92977.7	1.19481	0.0176434	3.55836	up
N6-(2-Hydroxyethyl)adenosine	Nucleotides and derivatives	10107.9	38254	1.2431	0.0431719	3.78456	up
2'-Deoxyadenosine-5'-monophosphate	Nucleotides and derivatives	75044.3	161430	1.22812	0.0142669	2.15113	up
2'-Deoxyinosine-5'-monophosphate	Nucleotides and derivatives	1.89537e+06	4.51857e+06	1.25	0.00377793	2.38401	up
Ribosyladenosine	Nucleotides and derivatives	18429.7	44753.7	1.05472	0.055352	2.42835	up
Daidzein	Flavonoids	123130	271957	1.25427	0.00764294	2.2087	up
Liquiritigenin	Flavonoids	180080	1.82887e+06	1.27627	1.8166e-05	10.1559	up
Butin	Flavonoids	712430	272983	1.27066	0.00245229	0.383172	down
Naringenin (5,7,4'-Trihydroxyflavanone)	Flavonoids	534610	205463	1.26664	0.00027857	0.384324	down
Daidzein-7-O-glucoside(Daidzin)	Flavonoids	1422400	3204400	1.24205	0.0280933	2.25281	up
Daidzein-4'-O-glucoside	Flavonoids	1541500	3.17663e+06	1.22339	0.0249531	2.06074	up
Liquiritigenin-4'-O-Glucoside (Liquiritin)	Flavonoids	229400	1.72473e+06	1.27596	0.000897571	7.51845	up
Apigenin-5-O-glucoside	Flavonoids	1.63103e+06	9.89183e+06	1.26361	0.00898528	6.06476	up
Calycosin-7-O-glucoside	Flavonoids	18627000	3.99713e+07	1.23727	0.00919519	2.14588	up
Glycitin	Flavonoids	1259800	2.73187e+06	1.22071	0.0292181	2.16849	up
Luteolin-3'-O-glucoside	Flavonoids	224723	876960	1.27162	0.003739	3.9024	up
Kaempferol-3-O-glucoside (Astragalin)	Flavonoids	247200	805347	1.24201	0.0264952	3.25787	up
Luteolin-4'-O-glucoside	Flavonoids	236523	831317	1.23097	0.0385247	3.51473	up
Kaempferol-3-O-galactoside (Trifolin)	Flavonoids	29762.3	85797.7	1.26437	4.01536e-05	2.88276	up
Kaempferol-7-O-glucoside	Flavonoids	25452.7	97853.3	1.22954	0.0113812	3.84452	up
Aureusidin-4-O-glucoside	Flavonoids	288577	991557	1.21074	0.00125173	3.43603	up
3',5,5',7-Tetrahydroxyflavanone-7-O-glucoside	Flavonoids	132593	295277	1.2067	0.00237432	2.22693	up
6''-O-Acetylglycitin	Flavonoids	39106	82185.3	1.16584	0.00867594	2.1016	up
Kaempferol-3-O-(6''-acetyl)glucoside	Flavonoids	195967	828250	1.23887	0.0150327	4.22648	up
Pinocembrin-7-O-(6''-O-malonyl)glucoside	Flavonoids	290270	767933	1.27073	0.00319649	2.64558	up
Genistein-7-O-(6''-malonyl)glucoside	Flavonoids	337820	1624800	1.22937	0.0153302	4.80966	up
Kaempferol-3-O-(6''-malonyl)glucoside*	Flavonoids	999207	3.51123e+06	1.25595	0.0180692	3.51402	up
Kaempferol-3-O-(6''-malonyl)galactoside*	Flavonoids	1218400	4277300	1.2572	0.000205855	3.51059	up
Kaempferide-3-O-(6''-malonyl)glucoside	Flavonoids	111113	400787	1.26702	0.00736816	3.60701	up
Daidzein-7-O-apiosyl(1→6)glucoside	Flavonoids	206030	622427	1.26697	0.000659412	3.02105	up
Daidzein-7-O-Glucoside-4'-O-Apioside	Flavonoids	2.31237e+06	1.0328e+06	1.21104	0.0375699	0.446641	down
Quercetin-7-O-(6''-malonyl)glucoside	Flavonoids	15550	36300.7	1.1625	0.00904042	2.33445	up
Apigenin-8-C-(2''-xylosyl)glucoside*	Flavonoids	51469.3	176447	1.26181	0.0032694	3.42819	up
Apigenin-7-O-(2''-glucosyl)arabinoside	Flavonoids	130827	63304.7	1.21268	0.0316801	0.483882	down
Apigenin-6-C-(2''-xylosyl)glucoside*	Flavonoids	31016	155227	1.25171	0.0269223	5.00473	up
Hispidulin-8-C-(2''-O-xylosyl)xyloside	Flavonoids	693887	310787	1.2298	0.0338833	0.447893	down
Pinocembrin-7-O-neohesperidoside	Flavonoids	9	45844.7	1.27696	0.000850521	5093.85	up
Pinocembrin-7-O-rutinoside	Flavonoids	1531.8	68434.7	1.092	1.35724e-05	44.676	up
Luteolin-7-O-rutinoside	Flavonoids	76593.7	168130	1.15908	0.0155628	2.19509	up
Kaempferol-3-O-rutinoside(Nicotiflorin)	Flavonoids	24695.3	60933.3	1.22254	0.00625418	2.4674	up
Kaempferol-3-O-neohesperidoside	Flavonoids	718237	1.93337e+06	1.27051	0.00511464	2.69182	up
Luteolin-7-O-neohesperidoside (Lonicerin)	Flavonoids	703553	2030300	1.26487	0.0108428	2.88578	up
Vitexin-2''-O-galactoside	Flavonoids	54963.7	117547	1.25962	0.000189559	2.13862	up
Luteolin-6,8-di-C-glucoside	Flavonoids	9	6340	1.27654	0.0070614	704.444	up
Luteolin-7-O-(6''-malonyl)glucoside-5-O-rhamnoside	Flavonoids	222100	697220	1.26147	0.0152656	3.13922	up
Kaempferol-3-O-(6''-Malonyl)glucoside-7-O-Glucoside	Flavonoids	30988.3	93885	1.13928	0.0915498	3.02969	up
Isovitexin-2''-O-(6'''-p-coumaroyl)glucoside	Flavonoids	9	510470	1.27679	0.00910553	56718.9	up
2,6-Dimethoxy-1,4-benzoquinone	Quinones	495333	1165030	1.23117	0.026842	2.35201	up
Physcion-8-O-(6-acetyl)-glucoside	Quinones	3687.67	15137	1.27068	1.06191e-05	4.10476	up
D-Threose	Others	96121.3	16506	1.2486	0.000386551	0.17172	down
Nicotinamide	Others	34404.3	157553	1.24333	0.0446435	4.57946	up
4-Guanidinobutanal	Others	1.80327e+07	7821300	1.24799	0.0155356	0.43373	down
Pyridoxine	Others	43140.7	106369	1.19094	0.0588336	2.46562	up
Dulcitol*	Others	41183.7	95108	1.24281	0.00134351	2.30936	up
D-Mannitol*	Others	11342.3	23564.3	1.06899	0.0715368	2.07757	up
D-Sorbitol	Others	25907.3	57468.7	1.19274	0.00681573	2.21824	up
2,6-Dimethyl-7-octene-2,3,6-triol	Others	117433	19969	1.24986	0.000526567	0.170045	down
D-Galacturonic acid*	Others	278003	4884000	1.27614	0.000531071	17.5681	up
D-Glucoronic acid*	Others	368860	5539600	1.27427	0.000899483	15.0182	up
D-Pinitol	Others	33950.3	124667	1.23234	0.0201583	3.67203	up
Gluconic acid	Others	286890	1.59803e+06	1.27639	0.000933773	5.5702	up
D-Galactaric acid*	Others	296250	660413	1.19159	0.0521573	2.22924	up
D-Saccharic acid*	Others	726923	1.70547e+06	1.26888	0.0010421	2.34614	up
Sedoheptulose	Others	141271	305890	1.11559	0.0104662	2.16527	up
Calcium Pantothenate	Others	9113.47	20628.7	1.15234	0.103199	2.26354	up
D-Panose*	Others	220413	944433	1.25854	0.00725351	4.28483	up
Maltotriose	Others	615477	1.99513e+06	1.224	0.0363009	3.24161	up
Raffinose*	Others	740990	3.96683e+06	1.26925	0.00911579	5.35342	up
D-Melezitose	Others	99656.7	374773	1.25397	0.010446	3.76064	up
D-Maltotetraose	Others	23986.3	117823	1.23732	0.000207325	4.9121	up
Stachyose	Others	126640	1.26383e+06	1.27667	0.000190362	9.97973	up
Nystose	Others	158917	1.45267e+06	1.27293	0.0015268	9.14106	up
Azetidine-2-carboxylic acid	Alkaloids	1423300	558727	1.26801	0.0019265	0.392557	down
Histamine	Alkaloids	66223.7	27464.3	1.21924	0.00200524	0.414721	down
6-Deoxyfagomine	Alkaloids	4982800	1.69353e+06	1.26738	0.00185822	0.339876	down
N-benzylformamide	Alkaloids	2.64667e+06	598667	1.27152	0.00611578	0.226196	down
Indole-3-carboxaldehyde	Alkaloids	154530	309177	1.2477	0.000462744	2.00075	up
4-Hydroxymandelonitrile	Alkaloids	1.49077e+07	4.22703e+06	1.2686	9.43373e-05	0.283548	down
DL-2-Aminoadipic acid	Alkaloids	9391600	2.34027e+06	1.26521	0.00160706	0.249187	down
N-(2-Hydroxy-4-methoxyphenyl)acetamide	Alkaloids	15040000	3.75627e+06	1.26103	0.00490404	0.249752	down
3-Indoleacrylic acid	Alkaloids	8.87777e+06	1.89837e+07	1.2579	0.000161537	2.13834	up
N-Oleoylethanolamine	Alkaloids	108513	34787.3	1.26003	0.000770916	0.320581	down
1-Aminocyclopropane-1-carboxylic acid	Organic acids	728367	300987	1.25192	0.0139839	0.413235	down
γ-Aminobutyric acid	Organic acids	4.33153e+06	1.90777e+06	1.27236	0.00185698	0.440437	down
L-Pipecolic Acid	Organic acids	20146000	8.93553e+06	1.25814	0.00014888	0.443539	down
6-Aminocaproic acid	Organic acids	1.50729e+06	370683	1.17016	0.0519427	0.245928	down
3-Ureidopropionic Acid	Organic acids	521213	125697	1.27424	0.000241917	0.241162	down
6-Hydroxyhexanoic acid	Organic acids	9	27205.7	1.27592	0.025503	3022.85	up
1-Methylpiperidine-2-carboxylic acid	Organic acids	156770	319627	1.2103	0.00429323	2.03883	up
2,3-Dimethylsuccinic acid	Organic acids	8545.77	23623	1.16353	0.00377798	2.76429	up
2,2-Dimethylsuccinic acid	Organic acids	173290	29980.7	1.27085	0.000883584	0.173009	down
2-Isopropylmalic Acid	Organic acids	769713	2.10267e+06	1.25587	0.00988856	2.73175	up
2-Propylmalic Acid*	Organic acids	753927	2.13677e+06	1.26706	0.00613047	2.83418	up
3-Isopropylmalic Acid*	Organic acids	780443	2.06573e+06	1.26971	0.0056636	2.64687	up
Azelaic acid	Organic acids	991630	161003	1.26345	8.58803e-05	0.162362	down
2,6-Diaminooimelic acid	Organic acids	473163	1671600	1.26783	0.00565192	3.53282	up
10-Heptadecenoic Acid	Lipids	566990	227940	1.2268	0.0216613	0.402018	down
Crepenynic acid	Lipids	108923	27522.3	1.27425	4.96735e-05	0.252676	down
γ-Linolenic Acid*	Lipids	79300000	2.72597e+07	1.27263	8.99201e-05	0.343754	down
α-Linolenic Acid*	Lipids	7.48227e+07	2.48587e+07	1.27433	0.000753961	0.332234	down
Punicic acid (9Z,11E,13Z-octadecatrienoic acid)	Lipids	604643	130557	1.26529	0.008625	0.215923	down
Linoleic acid	Lipids	7.02943e+07	22323000	1.26151	0.000186349	0.317565	down
(9Z,11E)-Octadecadienoic acid	Lipids	41982	11000.1	1.26701	0.000300609	0.26202	down
9-Hydroxy-10,12,15-octadecatrienoic acid*	Lipids	16246.7	9	1.27696	0.000511294	0.00055396	down
17-Hydroxylinolenic acid	Lipids	60948.3	9	1.27697	0.000500047	0.000147666	down
13S-Hydroxy-9Z,11E,15Z-octadecatrienoic acid	Lipids	19700	2104.13	1.26282	3.76903e-06	0.106809	down
13-KODE; (9Z,11E)-13-Oxooctadeca-9,11-dienoic acid*	Lipids	13144.7	9	1.27658	0.00787629	0.000684688	down
9S-Hydroxy-10E,12Z-octadecadienoic acid*	Lipids	124780	24544	1.26676	4.73274e-05	0.196698	down
13(S)-HODE;13(S)-Hydroxyoctadeca-9Z,11E-dienoic acid*	Lipids	123103	23439.3	1.27481	0.00133094	0.190404	down
9(10)-EpOME;(9R,10S)-(12Z)-9,10-Epoxyoctadecenoic acid	Lipids	37646	9	1.27683	0.00391476	0.000239069	down
12,13-Epoxy-9-Octadecenoic Acid	Lipids	20554	738.067	1.08462	0.000197207	0.0359087	down
Ricinoleic acid	Lipids	424037	188283	1.22212	0.0157762	0.444026	down
1-Eicosanol	Lipids	590423	284743	1.22811	0.0144782	0.48227	down
5S,8R-DiHODE; (5S,8R,9Z,12Z)-5,8-Dihydroxyoctadeca-9,12-dienoate	Lipids	23320	9	1.27695	0.000890252	0.000385935	down
9-Hydroxy-12-oxo-15(Z)-octadecenoic acid	Lipids	25999.7	9	1.27688	0.00276624	0.000346158	down
Hydroxy ricinoleic acid	Lipids	12896.7	442.6	1.09823	0.00203857	0.0343189	down
Ethyl 9-Hydroxy-10,12-octadecadienoic acid	Lipids	18018.3	5312.07	1.24835	0.00377201	0.294815	down
9,12,13-Trihydroxy-10,15-octadecadienoic acid	Lipids	26380.7	7964.77	1.24371	0.0156643	0.301917	down
9,10,13-Trihydroxy-11-Octadecenoic Acid	Lipids	139120	8950.23	1.27579	3.32172e-05	0.0643346	down
9,10-Dihydroxy-12,13-epoxyoctadecanoic acid	Lipids	6680.17	9	1.27653	0.00854113	0.00134727	down
9,12,13-TriHOME; 9(S),12(S),13(S)-Trihydroxy-10(E)-octadecenoic acid	Lipids	200490	13631	1.27343	0.000126418	0.0679884	down
2-α-Linolenoyl-glycerol	Lipids	437437	192777	1.2608	0.000634809	0.440696	down
1-α-Linolenoyl-glycerol	Lipids	2.08167e+06	676020	1.27436	9.39035e-06	0.324749	down
1-Linoleoylglycerol	Lipids	767587	214973	1.27633	7.82762e-07	0.280064	down
LysoPE 15:0	Lipids	12586.7	5868.57	1.21202	0.0161625	0.466253	down
LysoPE 18:1	Lipids	503397	219327	1.25997	0.000387015	0.435694	down
LysoPE 18:1(2n isomer)	Lipids	474743	197247	1.2543	0.0176964	0.415481	down
2-α-Linolenoyl-glycerol-1-O-glucoside	Lipids	9744.47	4012.13	1.08589	0.0276671	0.411735	down
