# Supplementary material for: Combined Metabolomic and Quantitative RT-PCR Analyses Revealed the Synthetic Differences of 2-Acetyl-1-pyrroline in Aromatic and Non-Aromatic Vegetable Soybeans
Source: Int J Mol Sci. 2022 Nov 22;23(23):14529. doi: 10.3390/ijms232314529 (PMC9738111; doi:10.3390/ijms232314529)
Supplement: Supplementary file 1 [file ijms-23-14529-s001.zip › ijms-1956011-supplementary/Table S3.xlsx]

## Sheet: Sheet1
Table S3 differential accumulation metabolites (DAMs) in ZX8-S6 and ZK1754-S6 (* indicates the racemates)
Compounds	Class	ZX8-S6	ZK1754-S6	VIP	p_value	Fold_Change	Type
N-Methylglycine	Amino acids and derivatives	13659.7	9	1.22179	0.0191112	0.000658874	down
L-Serine	Amino acids and derivatives	2.01497e+06	500733	1.22104	0.00139072	0.248507	down
L-Threonine*	Amino acids and derivatives	1241300	607510	1.19668	0.00418792	0.489414	down
L-Norleucine	Amino acids and derivatives	1.13333e+06	481390	1.21244	5.22313e-05	0.424756	down
L-Isoleucine*	Amino acids and derivatives	5.54817e+06	2.44723e+06	1.2102	0.000102021	0.441089	down
L-Asparagine	Amino acids and derivatives	4.97313e+06	629697	1.21359	0.016113	0.12662	down
L-Ornithine	Amino acids and derivatives	326013	9044.87	1.21896	0.00171633	0.0277439	down
L-Aspartic Acid	Amino acids and derivatives	1.29807e+07	2.78473e+06	1.22227	5.22813e-05	0.214529	down
S-Methyl-L-cysteine	Amino acids and derivatives	490707	224290	1.20814	0.0107388	0.457076	down
L-threo-3-Methylaspartate	Amino acids and derivatives	1754200	466573	1.22119	7.60218e-07	0.265975	down
(2S,3R,4S)-4-Hydroxyisoleucine	Amino acids and derivatives	440333	122661	1.18149	0.00136316	0.278563	down
4-Hydoxy-L-Isoleucine	Amino acids and derivatives	471420	145063	1.18512	0.0123618	0.307716	down
L-Methionine	Amino acids and derivatives	8.97977e+06	2.11103e+06	1.20739	0.0131149	0.235088	down
L-Histidine	Amino acids and derivatives	8.83427e+07	1.85137e+07	1.22192	0.000608949	0.209567	down
N-Methyl-L-Glutamate	Amino acids and derivatives	17102.7	9	1.2219	0.0155428	0.000526234	down
L-Methionine methyl ester	Amino acids and derivatives	57210.3	9	1.2225	0.000132056	0.000157314	down
L-Glycyl-L-proline	Amino acids and derivatives	120638	52335.7	1.16849	0.0271765	0.433823	down
N-α-Acetyl-L-ornithine	Amino acids and derivatives	3.56153e+06	388720	1.22147	0.000318761	0.109144	down
L-Arginine	Amino acids and derivatives	13208000	2.84037e+06	1.21961	1.45845e-05	0.215049	down
Homoarginine	Amino acids and derivatives	707723	147183	1.21991	0.000824905	0.207967	down
N-Monomethyl-L-arginine	Amino acids and derivatives	2811100	686290	1.21647	1.99567e-05	0.244136	down
N-Acetyl-L-Methionine	Amino acids and derivatives	51295.3	7913.73	1.19065	0.000637815	0.154278	down
L-Tyrosine methyl ester	Amino acids and derivatives	30961.3	12960.3	1.19365	0.00153096	0.418597	down
Glycylphenylalanine	Amino acids and derivatives	209717	600567	1.14984	0.0255645	2.8637	up
L-Alanyl-L-Phenylalanine	Amino acids and derivatives	24202.8	105377	1.09157	0.0015318	4.35393	up
L-Leucyl-L-Leucine	Amino acids and derivatives	98420	29518.3	1.14453	0.0224987	0.299922	down
L-Isoleucyl-L-Aspartate	Amino acids and derivatives	198837	90959	1.18096	0.0032277	0.457456	down
L-Valyl-L-Phenylalanine	Amino acids and derivatives	24590	86852	1.16361	0.0201949	3.532	up
L-Homocystine	Amino acids and derivatives	38484.3	133313	1.18642	0.0230854	3.46409	up
γ-glutamylmethionine	Amino acids and derivatives	647733	128240	1.21461	0.00948355	0.197983	down
L-Leucyl-L-phenylalanine	Amino acids and derivatives	96818.7	36931.7	1.20671	0.00572852	0.381452	down
Tryptophan glutamic acid	Amino acids and derivatives	47795.3	10174	1.19169	0.0254752	0.212865	down
S-Adenosyl-L-methionine	Amino acids and derivatives	227943	23905	1.19726	0.0296601	0.104873	down
2,5-Dihydroxybenzaldehyde*	Phenolic acids	140230	1.06439e+06	1.21552	0.00116002	7.59034	up
4-Hydroxybenzoic acid	Phenolic acids	294323	2218600	1.2166	0.000179268	7.53797	up
Protocatechualdehyde*	Phenolic acids	178520	1.44567e+06	1.21617	1.01493e-06	8.09807	up
Cinnamic acid	Phenolic acids	785713	116157	1.21805	0.004904	0.147836	down
Vanillic acid	Phenolic acids	9	115393	1.22239	0.0039494	12821.5	up
3,4-Dihydroxybenzeneacetic acid	Phenolic acids	23513	9	1.22239	0.00335217	0.000382767	down
Methyl caffeate	Phenolic acids	24171.7	74503	1.2168	0.00360335	3.08225	up
Syringic acid	Phenolic acids	9	34878	1.22236	0.00499311	3875.33	up
1-O-Salicyl-D-glucose	Phenolic acids	530543	105458	1.21446	0.000128426	0.198773	down
Salicylic acid-2-O-glucoside	Phenolic acids	2.46877e+06	1.08357e+06	1.21259	0.00155479	0.43891	down
4-O-Glucosyl-3,4-dihydroxybenzyl alcohol	Phenolic acids	12344.7	5542.53	1.1826	0.0148775	0.448982	down
Trans-5-O-(p-Coumaroyl)shikimate	Phenolic acids	58004	9	1.22119	0.0375258	0.000155162	down
1-O-Vanilloyl-D-Glucose	Phenolic acids	350023	707803	1.21188	0.00628348	2.02216	up
Vanillic acid-4-O-glucoside	Phenolic acids	14592.7	31738.7	1.12611	0.048548	2.17497	up
2,4,6-trihydroxy-acetophenone-4-O-β-D-glucopyranoside	Phenolic acids	1159900	2.58983e+06	1.21717	6.41016e-05	2.23281	up
3,4,5-Trimethoxyphenyl-1-O-Glucoside	Phenolic acids	3526100	7.94657e+06	1.20714	0.00176711	2.25364	up
5-O-Caffeoylshikimic acid	Phenolic acids	34714.3	13825.7	1.18175	0.0117555	0.39827	down
6-O-Caffeoyl-D-glucose	Phenolic acids	92914	206363	1.21347	4.51773e-05	2.22101	up
Rosmarinic acid	Phenolic acids	52563.3	9	1.22084	0.041094	0.000171222	down
β-Oxoacteoside	Phenolic acids	35126	14477.3	1.12094	0.0214981	0.412154	down
Adenine	Nucleotides and derivatives	299763	1.43683e+06	1.21741	0.00701407	4.79323	up
2-Aminopurine	Nucleotides and derivatives	15108.7	585840	1.2171	0.0130503	38.7751	up
1-Methyladenine	Nucleotides and derivatives	170393	47756	1.18788	0.00044415	0.280269	down
Isoguanine	Nucleotides and derivatives	329823	95263	1.20199	0.000288441	0.28883	down
6-O-methylguanine	Nucleotides and derivatives	33107.3	11711	1.16963	0.00643337	0.353728	down
Cytidine	Nucleotides and derivatives	189237	528480	1.18501	0.00534146	2.79269	up
Cytarabine	Nucleotides and derivatives	168483	405577	1.1806	0.00126038	2.40722	up
1-beta-D-Arabinofuranosyluracil	Nucleotides and derivatives	181667	1233100	1.21309	7.83866e-06	6.78771	up
Uridine	Nucleotides and derivatives	190347	1.48407e+06	1.21892	0.00013889	7.79665	up
5'-Deoxyadenosine	Nucleotides and derivatives	5929.57	112734	1.21431	0.00482628	19.0121	up
2'-Deoxyadenosine	Nucleotides and derivatives	10420.5	133923	1.21819	0.00433632	12.8519	up
Adenosine	Nucleotides and derivatives	1.67803e+06	6.00677e+07	1.2214	6.52217e-05	35.7965	up
9-(Arabinosyl)hypoxanthine	Nucleotides and derivatives	34318.7	80744	1.11451	0.0165338	2.35277	up
2'-O-Methyladenosine	Nucleotides and derivatives	24337.7	103564	1.19468	0.0204635	4.2553	up
Guanosine	Nucleotides and derivatives	2.59347e+06	6171400	1.22046	9.3809e-05	2.37959	up
Xanthosine	Nucleotides and derivatives	1307100	6.46473e+06	1.22081	0.000124218	4.94586	up
5'-Deoxy-5'-(methylthio)adenosine	Nucleotides and derivatives	7.13053e+06	980980	1.2157	0.0117307	0.137575	down
Cyclic 3',5'-Adenylic acid	Nucleotides and derivatives	9	28436.7	1.22231	0.00474394	3159.63	up
2'-Deoxyinosine-5'-monophosphate	Nucleotides and derivatives	1.53873e+06	4178500	1.16525	0.00143536	2.71555	up
β-Nicotinamide mononucleotide	Nucleotides and derivatives	160803	47121.3	1.20372	0.0094424	0.293037	down
Adenosine 5'-monophosphate	Nucleotides and derivatives	1440100	17011000	1.21998	0.000479078	11.8124	up
3'-Adenylic Acid	Nucleotides and derivatives	1903.09	28077	1.15701	0.0735869	14.7534	up
Inosine 5'-monophosphate	Nucleotides and derivatives	107027	1369600	1.21821	0.0121872	12.7968	up
Guanosine 5'-monophosphate	Nucleotides and derivatives	34876.3	119783	1.16469	0.000545716	3.43452	up
Adenosine 5'-diphosphate	Nucleotides and derivatives	74391	23611.3	1.16556	0.00610423	0.317395	down
Citicoline	Nucleotides and derivatives	5282.3	9	1.21932	0.0525051	0.0017038	down
ATP; Adenosine 5'-Triphosphate	Nucleotides and derivatives	48583.3	9	1.2213	0.0294205	0.000185249	down
Uridine 5'-diphospho-D-glucose	Nucleotides and derivatives	898177	9	1.22248	0.00180424	1.00203e-05	down
NADP (Nicotinamide adenine dinucleotide phosphate)	Nucleotides and derivatives	216517	60607	1.18565	0.00438176	0.279918	down
Daidzein	Flavonoids	139830	1.80657e+06	1.21465	0.0129231	12.9197	up
Liquiritigenin	Flavonoids	273153	1.47867e+06	1.21917	0.000224454	5.41332	up
6-Hydroxy-2'-methoxyflavone	Flavonoids	2911.93	20535.3	1.15798	0.0802481	7.05213	up
Apigenin	Flavonoids	39455	222430	1.20087	0.000389371	5.63756	up
3',4',7-Trihydroxyflavone	Flavonoids	61930.7	434603	1.21897	0.000817871	7.01758	up
Genistein	Flavonoids	72526.7	557240	1.21862	0.000383396	7.68324	up
Glycitein	Flavonoids	8746.93	53255	1.17711	0.053825	6.08842	up
3',7-dihydroxy-4'-methoxyflavone	Flavonoids	92553.7	536827	1.1929	0.0029929	5.80017	up
Calycosin	Flavonoids	16689.4	88382.3	1.13344	0.0500265	5.29572	up
Liquiritigenin-4'-O-Glucoside (Liquiritin)	Flavonoids	184170	1380300	1.2199	0.0039648	7.49471	up
Apigenin-5-O-glucoside	Flavonoids	2943700	8454000	1.19295	0.000673646	2.8719	up
Dihydrocharcone-4'-O-glucoside	Flavonoids	58257.3	19466.3	1.12419	0.0049243	0.334144	down
Phloretin-2'-O-glucoside (Phlorizin)	Flavonoids	32472.7	13898.5	1.01898	0.0248476	0.428005	down
Luteolin-3'-O-glucoside	Flavonoids	257993	781160	1.19866	0.00776868	3.02783	up
Kaempferol-3-O-glucoside (Astragalin)	Flavonoids	194153	865737	1.21804	0.00297964	4.45904	up
Luteolin-4'-O-glucoside	Flavonoids	228287	886430	1.21258	2.31818e-05	3.88297	up
Kaempferol-3-O-galactoside (Trifolin)	Flavonoids	29959.3	87833.3	1.12295	0.0053986	2.93175	up
Kaempferol-7-O-glucoside	Flavonoids	26394	91264.3	1.20398	9.11563e-05	3.45777	up
Aureusidin-4-O-glucoside	Flavonoids	230253	1035610	1.20906	0.0165247	4.4977	up
6''-O-Acetyldaidzin	Flavonoids	4898600	986457	1.21996	0.00338108	0.201375	down
Apigenin-7-O-(6''-acetyl)glucoside	Flavonoids	5.85433e+06	1076300	1.22218	0.000472589	0.183847	down
6''-O-Acetylgenistin	Flavonoids	323260	55288.3	1.21148	0.00304959	0.171034	down
Kaempferol-3-O-(6''-acetyl)glucoside	Flavonoids	211947	776927	1.21349	0.00649573	3.66567	up
Kaempferol-3-O-(6''-malonyl)glucoside*	Flavonoids	1340500	4136800	1.22139	0.00111339	3.08601	up
Kaempferol-3-O-(6''-malonyl)galactoside*	Flavonoids	1107700	4.15043e+06	1.21902	0.00169146	3.74689	up
Diosmetin-7-O-(6''-malonyl)glucoside	Flavonoids	11940.3	25717.3	1.17089	0.00156422	2.15382	up
Daidzein-7-O-apiosyl(1→6)glucoside	Flavonoids	394833	823457	1.19833	0.00229837	2.08558	up
Daidzein-7-O-Glucoside-4'-O-Apioside	Flavonoids	2.58453e+06	1.01142e+06	1.12796	0.00545837	0.391334	down
Apigenin-7-O-(2''-glucosyl)arabinoside	Flavonoids	151307	53714	1.0873	0.00926071	0.355001	down
Apigenin-6-C-(2''-xylosyl)glucoside*	Flavonoids	89797.7	182737	1.13138	0.0524385	2.03498	up
Hispidulin-8-C-(2''-O-xylosyl)xyloside	Flavonoids	701820	308280	1.11894	0.0566974	0.439258	down
Pinocembrin-7-O-neohesperidoside	Flavonoids	9	35482.3	1.22245	0.00259347	3942.48	up
Pinocembrin-7-O-rutinoside	Flavonoids	7215.27	60603	1.21403	0.0121223	8.39927	up
Kaempferol-3-O-sambubioside	Flavonoids	23872	9	1.22244	0.00149521	0.000377011	down
Luteolin-7-O-rutinoside	Flavonoids	48218.7	139813	1.19187	0.000398435	2.89957	up
Kaempferol-3-O-rutinoside(Nicotiflorin)	Flavonoids	17032	52004.7	1.1514	0.00119632	3.05335	up
Kaempferol-3-O-neohesperidoside	Flavonoids	508890	1.93047e+06	1.2172	3.00088e-05	3.79349	up
Luteolin-7-O-neohesperidoside (Lonicerin)	Flavonoids	441643	1973400	1.20105	0.000885069	4.46831	up
Kaempferol-3,7-di-O-glucoside	Flavonoids	21207.3	54927.7	1.15229	0.0112563	2.59003	up
Luteolin-7-O-(6''-malonyl)glucoside-5-O-rhamnoside	Flavonoids	133887	590717	1.21894	3.58787e-05	4.41206	up
Isovitexin-2''-O-(6'''-p-coumaroyl)glucoside	Flavonoids	9	466067	1.2225	0.000412501	51785.2	up
Luteolin-7-O-Sophoroside-5-O-arabinoside	Flavonoids	13704	38425	1.13249	0.0423892	2.80393	up
2,6-Dimethoxy-1,4-benzoquinone	Quinones	552363	1.1379e+06	1.16545	0.00877571	2.06005	up
Pinoresinol-4-O-(6''-acetyl)glucoside	Lignans and Coumarins	102738	239010	1.21322	0.000975834	2.32641	up
D-Threose	Others	48881.7	10448.1	1.17487	0.000316029	0.213743	down
Nicotinamide	Others	78848	9	1.22222	0.00789813	0.000114144	down
Isonicotinic acid	Others	802967	165897	1.21807	0.00104172	0.206605	down
Nicotinic acid (Vitamin B3)	Others	1.02812e+06	232643	1.19256	0.0241898	0.22628	down
3-Dehydro-L-Threonic Acid*	Others	5.59357e+06	1569300	1.21763	0.000283805	0.280554	down
1,6-anhydro-β-D-glucose	Others	57339	2550.93	1.00514	0.00454884	0.0444886	down
1,5-Anhydro-D-glucitol	Others	57805	150387	1.18126	0.037559	2.60162	up
D-Fucose	Others	25722.7	65288	1.03089	0.0187871	2.53815	up
Pyridoxine	Others	94920	480033	1.21809	0.0028504	5.05724	up
Dihydroxyacetone phosphate	Others	122330	9	1.22234	0.0062963	7.35715e-05	down
Inositol*	Others	2.03753e+06	307670	1.21976	3.13615e-06	0.151001	down
D-Fructose*	Others	1.92347e+06	330220	1.2199	0.00398296	0.17168	down
D-Mannose*	Others	2671500	336990	1.22152	0.000829149	0.126143	down
D-Galactose*	Others	2.05317e+06	318207	1.22064	0.00179047	0.154983	down
D-Glucose*	Others	1903500	319833	1.21485	0.000792504	0.168024	down
D-Mannitol*	Others	11773.6	35132	1.1259	0.0124028	2.98397	up
D-Galacturonic acid*	Others	590380	1.92273e+06	1.21879	0.000935329	3.25677	up
D-Glucoronic acid*	Others	734200	2.34853e+06	1.2159	2.20065e-05	3.19877	up
Gluconic acid	Others	570023	5.10717e+06	1.22224	1.41191e-05	8.95957	up
D-Erythrose-4-phosphate	Others	46418	6403.73	1.20717	0.0254104	0.137958	down
D-Galactaric acid*	Others	541360	1273000	1.20884	0.005358	2.35149	up
N-Acetyl-D-mannosamine	Others	120777	897613	1.21943	0.00480921	7.43201	up
Biotin	Others	51064	21657	1.12612	0.00553634	0.424115	down
Glucose-1-phosphate*	Others	5463800	25749	1.2215	0.000629821	0.00471265	down
D-Glucose 6-phosphate*	Others	6.63023e+06	17701.3	1.22167	6.10278e-05	0.00266979	down
D-Fructose 6-Phosphate	Others	4351700	18963.7	1.22241	0.00115527	0.00435776	down
Vidarabine	Others	1.60933e+06	5.23703e+07	1.22235	0.000311521	32.5416	up
Kushenin	Others	2394.5	13633.9	1.13777	0.0483922	5.69385	up
Stachyose	Others	2149400	5060400	1.20039	0.000630284	2.35433	up
Nystose	Others	2.76977e+06	5.74827e+06	1.19698	0.00475821	2.07536	up
Histamine	Alkaloids	63035.3	9	1.2219	0.0182521	0.000142777	down
6-Deoxyfagomine	Alkaloids	3277200	1.29283e+06	1.21416	0.00169366	0.394493	down
4-Hydroxymandelonitrile	Alkaloids	9.76907e+06	2.37617e+06	1.2197	0.0034727	0.243234	down
2(3H)-Benzothiazolone	Alkaloids	12936	4093.37	1.19786	0.00363594	0.316432	down
1-Methyl-6-Oxo-1,6-Dihydropyridine-3-Carboxamide	Alkaloids	23602.3	55600	1.19539	0.0131016	2.3557	up
DL-2-Aminoadipic acid	Alkaloids	4.02073e+06	857040	1.21724	0.000958005	0.213155	down
Candicine	Alkaloids	35501	4764.3	1.2087	0.00374098	0.134202	down
N-(2-Hydroxy-4-methoxyphenyl)acetamide	Alkaloids	6.40307e+06	3.05373e+06	1.20691	0.0108374	0.476917	down
N-Oleoylethanolamine	Alkaloids	23846	278097	1.21707	0.000322214	11.6622	up
Soyasapogenol B-3-O-glucuronide	Terpenoids	24823	50399.3	1.14015	0.0031936	2.03035	up
Soyasaponin βc	Terpenoids	86076.7	218237	1.20491	0.00259362	2.53538	up
Compounds	Class I			VIP	p_value	Fold_Change	Type
Succinic anhydride	Organic acids	425600	111997	1.20918	0.012769	0.26315	down
Succinic acid*	Organic acids	29892000	7596200	1.221	0.00117593	0.254122	down
D-Erythronolactone	Organic acids	30418	9	1.22207	0.00881813	0.000295877	down
Methylmalonic acid*	Organic acids	29164000	7.48457e+06	1.2185	0.00423283	0.256637	down
Aminomalonic acid	Organic acids	1.04317e+06	230767	1.20863	0.000868346	0.221217	down
2-Picolinic acid	Organic acids	475633	100868	1.20605	0.00771274	0.21207	down
6-Aminocaproic acid	Organic acids	965143	298413	1.07286	0.028348	0.309191	down
3-Ureidopropionic Acid	Organic acids	262277	16350	1.21872	2.3548e-05	0.0623388	down
2-Hydroxyisocaproic acid	Organic acids	106700	328493	1.18062	0.00121185	3.07865	up
6-Hydroxyhexanoic acid	Organic acids	12826.3	52060.3	1.19452	0.0383795	4.05886	up
Iminodiacetic acid	Organic acids	1.20577e+06	279850	1.21794	0.00526707	0.232093	down
L-Malic acid*	Organic acids	4.37107e+07	1.30653e+07	1.21945	2.33902e-06	0.298905	down
1-Methylpiperidine-2-carboxylic acid	Organic acids	196490	483420	1.20444	0.00281525	2.46028	up
2,3-Dimethylsuccinic acid	Organic acids	24701	106403	1.18858	0.0146842	4.30763	up
2,2-Dimethylsuccinic acid	Organic acids	55650.3	9	1.22238	0.0028064	0.000161724	down
Adipic Acid*	Organic acids	125837	356843	1.19452	0.00693133	2.83577	up
2-Methylglutaric acid*	Organic acids	134773	277797	1.19025	0.0132203	2.06121	up
2,6-Diaminooimelic acid	Organic acids	633610	1.76083e+06	1.21136	0.000518905	2.77905	up
Crepenynic acid	Lipids	38318	11161.9	1.21449	0.00142688	0.291296	down
γ-Linolenic Acid*	Lipids	36038000	11669000	1.22139	7.4214e-05	0.323797	down
α-Linolenic Acid*	Lipids	3.32363e+07	1.07583e+07	1.22077	7.98147e-05	0.323692	down
Punicic acid (9Z,11E,13Z-octadecatrienoic acid)	Lipids	128873	676893	1.08224	0.190321	5.25239	up
17-Hydroxylinolenic acid	Lipids	9	539997	1.21869	0.168666	59999.6	up
13S-Hydroxy-9Z,11E,15Z-octadecatrienoic acid	Lipids	5536.8	35168.3	1.20678	0.0211955	6.35174	up
9S-Hydroxy-10E,12Z-octadecadienoic acid*	Lipids	24264	189433	1.14336	0.155717	7.80718	up
13(S)-HODE;13(S)-Hydroxyoctadeca-9Z,11E-dienoic acid*	Lipids	22569.7	196403	1.14461	0.163989	8.70209	up
9(10)-EpOME;(9R,10S)-(12Z)-9,10-Epoxyoctadecenoic acid	Lipids	2933.63	10039.4	1.05461	0.167607	3.42217	up
5S,8R-DiHODE; (5S,8R,9Z,12Z)-5,8-Dihydroxyoctadeca-9,12-dienoate	Lipids	5420.47	24895	1.12045	0.134131	4.59278	up
9-Hydroxy-12-oxo-15(Z)-octadecenoic acid	Lipids	9	22847.7	1.21728	0.125786	2538.63	up
Hydroxy ricinoleic acid	Lipids	9	27922	1.21602	0.154537	3102.44	up
Ethyl 9-Hydroxy-10,12-octadecadienoic acid	Lipids	3980.4	44066.7	1.22018	2.05019e-07	11.0709	up
9,12,13-Trihydroxy-10,15-octadecadienoic acid	Lipids	6571.67	9	1.22116	0.023723	0.00136952	down
9,10,13-Trihydroxy-11-Octadecenoic Acid	Lipids	14661.7	73865.3	1.10745	0.167091	5.03799	up
9,10-Dihydroxy-12,13-epoxyoctadecanoic acid	Lipids	9	26443	1.21993	0.0701165	2938.11	up
9,12,13-TriHOME; 9(S),12(S),13(S)-Trihydroxy-10(E)-octadecenoic acid	Lipids	21751	106800	1.11282	0.158079	4.91012	up
2-α-Linolenoyl-glycerol	Lipids	208277	19675	1.21928	0.00243167	0.0944657	down
1-α-Linolenoyl-glycerol	Lipids	837140	26180.3	1.2213	0.0017921	0.0312735	down
2-Linoleoylglycerol	Lipids	81193.7	39606.3	1.1596	0.0432513	0.487801	down
1-Linoleoylglycerol	Lipids	165183	39256.3	1.21653	0.000841289	0.237653	down
1-Oleoyl-Sn-Glycerol	Lipids	28139.3	13487	1.21712	0.00159726	0.479294	down
LysoPE 14:0	Lipids	3914.13	63789	1.1981	0.00273959	16.2971	up
LysoPE 15:0	Lipids	5948.13	65612.7	1.21501	0.00497064	11.0308	up
LysoPE 16:0	Lipids	712897	9.48817e+06	1.22107	0.000833557	13.3093	up
LysoPE 16:0(2n isomer)	Lipids	148160	1.94417e+06	1.22134	8.12949e-08	13.1221	up
LysoPC 14:0	Lipids	18349.7	167993	1.21646	3.40142e-05	9.15512	up
LysoPE 18:3	Lipids	307897	675293	1.21502	0.00014491	2.19325	up
LysoPE 18:2(2n isomer)	Lipids	1.67443e+06	1.16447e+07	1.22197	0.000286447	6.95439	up
LysoPE 18:2	Lipids	872183	7.01347e+06	1.22158	0.000868466	8.04128	up
LysoPE 18:1	Lipids	285163	1.61717e+06	1.21925	1.95129e-06	5.67102	up
LysoPE 18:1(2n isomer)	Lipids	272517	2.22803e+06	1.22182	1.77569e-05	8.17577	up
LysoPC 15:0	Lipids	14703.7	116382	1.21169	0.0154864	7.91515	up
LysoPE 18:0	Lipids	30309.3	144893	1.2175	3.88656e-05	4.78049	up
LysoPC 16:1(2n isomer)	Lipids	38801.3	98538.7	1.19947	0.0168705	2.53957	up
LysoPC 16:1	Lipids	31199.7	104248	1.21028	0.00976632	3.34132	up
LysoPC 16:0(2n isomer)	Lipids	414107	2.43283e+06	1.21541	0.0109814	5.8749	up
LysoPC 16:0	Lipids	2.79123e+06	2.09073e+07	1.22056	0.00144475	7.49036	up
LysoPC 17:1	Lipids	20704.3	44670	1.09601	0.0228286	2.15752	up
2-α-Linolenoyl-glycerol-1-O-glucoside	Lipids	2477.4	9	1.21958	0.0433028	0.00363284	down
1-α-Linolenoyl-glycerol-3-O-glucoside	Lipids	4063.5	9	1.22027	0.0285023	0.00221484	down
LysoPC 18:2	Lipids	1.12533e+07	27784000	1.22153	0.000397655	2.46896	up
LysoPC 18:0(2n isomer)	Lipids	44329.7	178707	1.21276	0.000594176	4.03131	up
LysoPC 18:0	Lipids	223820	965200	1.21378	0.00115854	4.31239	up
LysoPC 20:2	Lipids	7799.73	42984.3	1.21493	0.00117177	5.511	up
LysoPC 20:2(2n isomer)	Lipids	6728.67	37815	1.21686	0.00745886	5.61998	up
