# Supplementary material for: Combined Metabolomic and Quantitative RT-PCR Analyses Revealed the Synthetic Differences of 2-Acetyl-1-pyrroline in Aromatic and Non-Aromatic Vegetable Soybeans
Source: Int J Mol Sci. 2022 Nov 22;23(23):14529. doi: 10.3390/ijms232314529 (PMC9738111; doi:10.3390/ijms232314529)
Supplement: Supplementary file 1 [file ijms-23-14529-s001.zip › ijms-1956011-supplementary/Table S4.xlsx]

## Sheet: Sheet1
	Table S4 differential accumulation metabolites (DAMs) in ZX8-S5 and ZX8-S6
Compounds	Class	ZX8-S5	ZX8-S6	VIP	p_value	Fold_Change	Type
L-Alanine	Amino acids and derivatives	11444.3	4196.77	1.19165	0.0281946	0.366712	down
L-Ornithine	Amino acids and derivatives	80612.3	326013	1.29862	0.00029418	4.04421	up
S-Methyl-L-cysteine	Amino acids and derivatives	1.28513e+06	490707	1.30277	0.000446067	0.381833	down
L-Cyclopentylglycine	Amino acids and derivatives	284593	138267	1.27588	0.0108712	0.485839	down
L-threo-3-Methylaspartate	Amino acids and derivatives	4.70297e+06	1754200	1.31425	0.0013869	0.372999	down
N-Methyl-L-Glutamate	Amino acids and derivatives	58251.7	17102.7	1.29025	0.000449968	0.2936	down
N-α-Acetyl-L-ornithine	Amino acids and derivatives	1.65633e+06	3.56153e+06	1.31312	0.000432993	2.15025	up
L-Tyrosine	Amino acids and derivatives	27179000	10854700	1.29579	0.00139867	0.399378	down
N-Glycyl-L-leucine*	Amino acids and derivatives	155637	360200	1.1981	0.0176179	2.31436	up
L-Glycyl-L-isoleucine*	Amino acids and derivatives	309300	640540	1.30204	0.00824546	2.07093	up
Glycylphenylalanine	Amino acids and derivatives	71944	209717	1.19035	0.0177955	2.915	up
L-γ-Glutamyl-L-leucine	Amino acids and derivatives	168967	1667000	1.3092	0.00190268	9.86585	up
L-Homocystine	Amino acids and derivatives	11183.2	38484.3	1.19621	0.00431424	3.44126	up
γ-glutamylmethionine	Amino acids and derivatives	187553	647733	1.30212	0.011402	3.4536	up
γ-Glutamylphenylalanine	Amino acids and derivatives	2.02783e+06	2.65697e+07	1.31429	0.000326148	13.1025	up
γ-Glutamyltyrosine	Amino acids and derivatives	389683	2.18667e+06	1.31244	0.00096389	5.61139	up
Cinnamic acid	Phenolic acids	2.99483e+06	785713	1.3092	0.00010453	0.262356	down
3-Hydroxycinnamic Acid	Phenolic acids	192100	49495.3	1.28588	0.0277981	0.257654	down
2-Hydroxycinnamic acid	Phenolic acids	231920	91764	1.24828	0.00605374	0.395671	down
2-(Formylamino)benzoic acid	Phenolic acids	32966.3	13767	1.19194	0.0505327	0.417608	down
3,4-Dihydroxybenzeneacetic acid	Phenolic acids	71306.3	23513	1.30111	0.00467481	0.329746	down
Homogentisic acid	Phenolic acids	65629.3	23585	1.30379	0.00136994	0.359367	down
4-Methoxycinnamic acid	Phenolic acids	7238.23	3210	1.31562	7.5255e-07	0.443478	down
5-O-Caffeoylshikimic acid	Phenolic acids	73978	34714.3	1.22076	0.0335998	0.469252	down
Rosmarinic acid	Phenolic acids	24428.3	52563.3	1.07295	0.115163	2.15174	up
Gallein	Phenolic acids	40900.3	17717	1.2913	0.00103704	0.433175	down
2-Deoxyribose-5'-phosphate	Nucleotides and derivatives	59716.7	24237.3	1.13011	0.0165372	0.405872	down
Cytidine	Nucleotides and derivatives	1264000	189237	1.30841	1.18651e-05	0.149713	down
Cytarabine	Nucleotides and derivatives	1126300	168483	1.30849	3.31523e-05	0.14959	down
Adenosine	Nucleotides and derivatives	3449300	1.67803e+06	1.28344	0.000549354	0.486485	down
2'-Deoxyguanosine	Nucleotides and derivatives	46516	17192.3	1.26788	0.00130692	0.3696	down
Guanosine	Nucleotides and derivatives	7.85573e+06	2.59347e+06	1.31475	0.000283125	0.330137	down
2'-Deoxyadenosine-5'-monophosphate	Nucleotides and derivatives	75044.3	188573	1.28344	0.0107699	2.51283	up
Adenosine 5'-monophosphate	Nucleotides and derivatives	3.41193e+06	1440100	1.28612	0.0021042	0.422077	down
3'-Adenylic Acid	Nucleotides and derivatives	9392.27	1903.09	1.20852	0.0270018	0.202623	down
Inosine 5'-monophosphate	Nucleotides and derivatives	225860	107027	1.11813	0.110463	0.473863	down
Guanosine 5'-monophosphate	Nucleotides and derivatives	75984	34876.3	1.18323	0.021364	0.458996	down
Ribosyladenosine	Nucleotides and derivatives	18429.7	39097	1.06945	0.0314411	2.12142	up
Citicoline	Nucleotides and derivatives	23900	5282.3	1.24896	0.0174103	0.221017	down
Uridine 5'-diphospho-D-glucose	Nucleotides and derivatives	2.30643e+06	898177	1.30343	0.00327879	0.389422	down
3,9-Dihydroxypterocarpan	Flavonoids	85256.7	34451.3	1.30987	7.90753e-05	0.40409	down
Isoliquiritigenin	Flavonoids	69181.7	33542.3	1.28667	0.00453047	0.484844	down
2,4,4'-trihydroxychalcone	Flavonoids	62579.7	27371.3	1.25661	0.00438448	0.437384	down
6-Hydroxy-2'-methoxyflavone	Flavonoids	9	2911.93	1.31247	0.0350483	323.548	up
Butin	Flavonoids	712430	85849	1.31496	0.00194752	0.120502	down
Naringenin (5,7,4'-Trihydroxyflavanone)	Flavonoids	534610	65438.3	1.31443	8.00879e-07	0.122404	down
Quercetin-3-O-glucoside (Isoquercitrin)	Flavonoids	23246	10685	1.22747	0.0567424	0.459649	down
Apigenin-6-C-(2''-xylosyl)glucoside*	Flavonoids	31016	89797.7	1.29713	0.00348039	2.8952	up
Luteolin-6,8-di-C-glucoside	Flavonoids	9	20193.7	1.31601	0.00673888	2243.74	up
Physcion-8-O-(6-acetyl)-glucoside	Quinones	3687.67	9153.7	1.2413	0.0430841	2.48225	up
Nicotinamide	Others	34404.3	78848	1.27488	0.0188955	2.2918	up
3-Dehydro-L-Threonic Acid*	Others	1.43953e+07	5.59357e+06	1.31363	3.17754e-05	0.388568	down
D-Threonic Acid	Others	210393	96449	1.22875	0.00870432	0.458422	down
Pyridoxine	Others	43140.7	94920	1.29037	0.00165723	2.20024	up
2,6-Dimethyl-7-octene-2,3,6-triol	Others	117433	19641	1.29178	0.000405074	0.167252	down
D-Galacturonic acid*	Others	278003	590380	1.30019	0.000423812	2.12364	up
D-Saccharic acid*	Others	726923	1597800	1.30584	0.0011443	2.19803	up
Sedoheptulose	Others	141271	296883	1.07761	0.042172	2.10152	up
N-Acetyl-D-mannosamine	Others	49825.3	120777	1.27263	0.000623307	2.424	up
Pyridoxine-5'-O-glucoside	Others	160813	446747	1.30342	0.00271972	2.77804	up
D-Glucose 1,6-bisphosphate	Others	19439.3	42053	1.12606	0.111073	2.16329	up
Majoroside	Others	9925.17	23258.7	1.19844	0.0190722	2.3434	up
Calcium Pantothenate	Others	9113.47	27305	1.2914	0.0195075	2.99612	up
D-Panose*	Others	220413	1.15567e+06	1.30304	0.00570081	5.24318	up
Maltotriose	Others	615477	1.87243e+06	1.26688	0.0271087	3.04225	up
Raffinose*	Others	740990	4.69497e+06	1.30671	0.0140542	6.33607	up
D-Melezitose	Others	99656.7	438740	1.30168	0.00493976	4.40252	up
D-Maltotetraose	Others	23986.3	196243	1.28957	0.0041888	8.18146	up
Stachyose	Others	126640	2149400	1.31368	0.00728908	16.9725	up
Nystose	Others	158917	2.76977e+06	1.31341	0.00292794	17.4291	up
Maltopentaose	Others	8042.5	17136.3	1.09273	0.0410981	2.13072	up
Verbascose	Others	5825.2	17811.7	1.23859	0.0171217	3.05769	up
Azetidine-2-carboxylic acid	Alkaloids	1423300	667293	1.29831	0.00118857	0.468835	down
N-benzylformamide	Alkaloids	2.64667e+06	1080080	1.28481	0.0037709	0.408091	down
DL-2-Aminoadipic acid	Alkaloids	9391600	4.02073e+06	1.30187	0.00402047	0.42812	down
N-(2-Hydroxy-4-methoxyphenyl)acetamide	Alkaloids	15040000	6.40307e+06	1.28765	0.00826703	0.425736	down
N-Oleoylethanolamine	Alkaloids	108513	23846	1.29992	0.000564712	0.219752	down
1-Aminocyclopropane-1-carboxylic acid	Organic acids	728367	319057	1.29298	0.0190891	0.438044	down
γ-Aminobutyric acid	Organic acids	4.33153e+06	1.79597e+06	1.3097	0.000770651	0.414626	down
6-Hydroxyhexanoic acid	Organic acids	9	12826.3	1.31617	0.000791881	1425.15	up
L-Malic acid*	Organic acids	9.52027e+07	4.37107e+07	1.31364	0.00065708	0.459133	down
2,3-Dimethylsuccinic acid	Organic acids	8545.77	24701	1.18223	0.0297186	2.89044	up
4-Acetamidobutyric acid	Organic acids	34808.3	82552.3	1.22456	0.00886369	2.37163	up
2,2-Dimethylsuccinic acid	Organic acids	173290	55650.3	1.30764	0.000851053	0.32114	down
L-Tartaric acid	Organic acids	209870	88716.7	1.29071	0.00616694	0.422722	down
Azelaic acid	Organic acids	991630	229580	1.29992	8.03359e-05	0.231518	down
Choline Alfoscerate	Lipids	555237	3.68967e+06	1.31342	0.00208891	6.64521	up
10-Heptadecenoic Acid	Lipids	566990	278000	1.24633	0.0319638	0.490308	down
Crepenynic acid	Lipids	108923	38318	1.31037	1.98311e-05	0.351789	down
γ-Linolenic Acid*	Lipids	79300000	36038000	1.31342	0.000813318	0.454451	down
α-Linolenic Acid*	Lipids	7.48227e+07	3.32363e+07	1.31251	0.00120674	0.444201	down
Punicic acid (9Z,11E,13Z-octadecatrienoic acid)	Lipids	604643	128873	1.29394	0.00601466	0.213139	down
Linoleic acid	Lipids	7.02943e+07	2.65747e+07	1.2968	0.000237507	0.378048	down
(9Z,11E)-Octadecadienoic acid	Lipids	41982	14309	1.30174	0.000252242	0.340837	down
Petroselinic acid	Lipids	1.85293e+07	8.15807e+06	1.30402	0.0049511	0.440278	down
Elaidic Acid	Lipids	6.77487e+07	30463000	1.30949	0.00322438	0.449647	down
11-Octadecanoic acid(Vaccenic acid)	Lipids	1.49313e+07	6.54453e+06	1.29607	0.000865411	0.438309	down
9-Hydroxy-10,12,15-octadecatrienoic acid*	Lipids	16246.7	3033.97	1.30195	1.79227e-05	0.186744	down
17-Hydroxylinolenic acid	Lipids	60948.3	9	1.31622	0.000500047	0.000147666	down
13S-Hydroxy-9Z,11E,15Z-octadecatrienoic acid	Lipids	19700	5536.8	1.30361	3.25258e-05	0.281056	down
13-KODE; (9Z,11E)-13-Oxooctadeca-9,11-dienoic acid*	Lipids	13144.7	3632.5	1.28825	0.00969444	0.276348	down
9S-Hydroxy-10E,12Z-octadecadienoic acid*	Lipids	124780	24264	1.3108	0.000117307	0.194454	down
13(S)-HODE;13(S)-Hydroxyoctadeca-9Z,11E-dienoic acid*	Lipids	123103	22569.7	1.31366	0.00116598	0.183339	down
9(10)-EpOME;(9R,10S)-(12Z)-9,10-Epoxyoctadecenoic acid	Lipids	37646	2933.63	1.31159	0.00422734	0.0779268	down
12,13-Epoxy-9-Octadecenoic Acid	Lipids	20554	1165.53	1.00962	0.000359301	0.0567059	down
Ricinoleic acid	Lipids	424037	183330	1.26226	0.0151501	0.432345	down
1-Eicosanol	Lipids	590423	186127	1.27748	0.00547524	0.315243	down
5S,8R-DiHODE; (5S,8R,9Z,12Z)-5,8-Dihydroxyoctadeca-9,12-dienoate	Lipids	23320	5420.47	1.30093	4.78738e-05	0.232439	down
9-Hydroxy-12-oxo-15(Z)-octadecenoic acid	Lipids	25999.7	9	1.3161	0.00276624	0.000346158	down
Hydroxy ricinoleic acid	Lipids	12896.7	9	1.31598	0.0057534	0.000697855	down
Ethyl 9-Hydroxy-10,12-octadecadienoic acid	Lipids	18018.3	3980.4	1.3042	0.00594134	0.220908	down
9,12,13-Trihydroxy-10,15-octadecadienoic acid	Lipids	26380.7	6571.67	1.27389	0.0103513	0.249109	down
9,10,13-Trihydroxy-11-Octadecenoic Acid	Lipids	139120	14661.7	1.31562	4.49803e-05	0.105389	down
9,10-Dihydroxy-12,13-epoxyoctadecanoic acid	Lipids	6680.17	9	1.31579	0.00854113	0.00134727	down
9,12,13-TriHOME; 9(S),12(S),13(S)-Trihydroxy-10(E)-octadecenoic acid	Lipids	200490	21751	1.3139	0.000105415	0.108489	down
2-α-Linolenoyl-glycerol	Lipids	437437	208277	1.30532	0.000251182	0.47613	down
1-α-Linolenoyl-glycerol	Lipids	2.08167e+06	837140	1.31014	1.29662e-05	0.402149	down
2-Linoleoylglycerol	Lipids	199307	81193.7	1.27045	0.00105571	0.407381	down
1-Linoleoylglycerol	Lipids	767587	165183	1.31461	2.652e-07	0.215198	down
LysoPE 15:0	Lipids	12586.7	5948.13	1.22726	0.0140266	0.472574	down
LysoPE 16:0	Lipids	1.43837e+06	712897	1.29345	0.000738188	0.495629	down
LysoPE 18:3	Lipids	805880	307897	1.30704	0.00266464	0.382063	down
LysoPE 18:0	Lipids	65103.3	30309.3	1.29301	0.000228864	0.465557	down
2-α-Linolenoyl-glycerol-1-O-glucoside	Lipids	9744.47	2477.4	1.25944	0.00109828	0.254237	down
1-α-Linolenoyl-glycerol-3-O-glucoside	Lipids	12624	4063.5	1.23271	0.00613731	0.321887	down
