# Supplementary material for: Combined Metabolomic and Quantitative RT-PCR Analyses Revealed the Synthetic Differences of 2-Acetyl-1-pyrroline in Aromatic and Non-Aromatic Vegetable Soybeans
Source: Int J Mol Sci. 2022 Nov 22;23(23):14529. doi: 10.3390/ijms232314529 (PMC9738111; doi:10.3390/ijms232314529)
Supplement: Supplementary file 1 [file ijms-23-14529-s001.zip › ijms-1956011-supplementary/Table S5.xlsx]

## Sheet: Sheet1
Table S5 differential accumulation metabolites (DAMs) in ZK1754-S5 and ZK1754-S6 (* indicates the racemates)
Compounds	Class	ZK1754-S5	ZK1754-S6	VIP	p_value	Fold_Change	Type
N-Methylglycine	Amino acids and derivatives	13552.5	9	1.26521	0.0573041	0.000664084	down
L-Alanine	Amino acids and derivatives	7915	1566.5	1.06944	0.0225292	0.197916	down
L-Serine	Amino acids and derivatives	1.57633e+06	500733	1.26375	0.00474594	0.317657	down
L-Asparagine	Amino acids and derivatives	3.08193e+06	629697	1.26414	0.00527995	0.204319	down
L-Aspartic Acid	Amino acids and derivatives	9.61983e+06	2.78473e+06	1.2687	0.000100718	0.289478	down
L-threo-3-Methylaspartate	Amino acids and derivatives	1.33423e+06	466573	1.26632	0.000173258	0.349694	down
(2S,3R,4S)-4-Hydroxyisoleucine	Amino acids and derivatives	414953	122661	1.22198	0.0012374	0.295601	down
4-Hydoxy-L-Isoleucine	Amino acids and derivatives	364733	145063	1.2125	0.0143532	0.397724	down
L-Histidine	Amino acids and derivatives	5.22533e+07	1.85137e+07	1.26345	0.00516851	0.354306	down
L-Alanyl-L-Alanine	Amino acids and derivatives	31996.7	12020.3	1.25197	0.0169614	0.375675	down
N-Methyl-L-Glutamate	Amino acids and derivatives	6388.27	9	1.26869	0.00687036	0.00140883	down
N-Acetyl-L-threonine	Amino acids and derivatives	28041	59311.7	1.20495	0.00287891	2.11518	up
L-Methionine methyl ester	Amino acids and derivatives	63748.7	9	1.26889	0.00702791	0.000141179	down
L-Glycyl-L-proline	Amino acids and derivatives	120214	52335.7	1.20132	0.0381436	0.435355	down
L-Glycyl-L-isoleucine*	Amino acids and derivatives	331607	939363	1.26519	7.8817e-05	2.83276	up
N-Acetyl-L-Methionine	Amino acids and derivatives	56184.7	7913.73	1.24091	4.40441e-05	0.140852	down
L-Tyrosine methyl ester	Amino acids and derivatives	30118.7	12960.3	1.20636	0.0309742	0.430309	down
L-Glycyl-L-phenylalanine	Amino acids and derivatives	1.43327e+06	640550	1.21863	0.0020944	0.446916	down
Glycylphenylalanine	Amino acids and derivatives	52662.3	600567	1.25771	0.018534	11.4041	up
L-Valyl-L-Leucine	Amino acids and derivatives	47648	108834	1.209	0.0015956	2.28413	up
L-Alanyl-L-Phenylalanine	Amino acids and derivatives	21142.3	105377	1.26262	0.00238902	4.98419	up
L-Leucyl-L-Leucine	Amino acids and derivatives	65015.7	29518.3	1.14015	0.00881542	0.454019	down
L-Isoleucyl-L-Aspartate	Amino acids and derivatives	201600	90959	1.20869	0.0148438	0.451186	down
γ-Glutamyl-L-valine	Amino acids and derivatives	46486.7	140147	1.25215	0.0120119	3.01477	up
L-γ-Glutamyl-L-leucine	Amino acids and derivatives	282817	1.15477e+06	1.26518	2.28762e-05	4.08309	up
L-Prolyl-L-Phenylalanine	Amino acids and derivatives	25296.3	54359	1.19039	0.0143018	2.14889	up
L-Valyl-L-Phenylalanine	Amino acids and derivatives	14257.7	86852	1.25649	0.0215595	6.0916	up
L-Homocystine	Amino acids and derivatives	8776.3	133313	1.25714	0.0156726	15.1902	up
γ-Glutamylphenylalanine	Amino acids and derivatives	9543200	3.65593e+07	1.26499	2.51355e-05	3.83093	up
γ-Glutamyltyrosine	Amino acids and derivatives	534377	1.59463e+06	1.25653	0.00085871	2.9841	up
S-Adenosyl-L-methionine	Amino acids and derivatives	169810	23905	1.24599	0.0124466	0.140775	down
2,5-Dihydroxybenzaldehyde*	Phenolic acids	133350	1.06439e+06	1.26319	0.00130098	7.98195	up
4-Hydroxybenzoic acid	Phenolic acids	264927	2218600	1.26728	0.00064811	8.37439	up
Protocatechualdehyde*	Phenolic acids	127317	1.44567e+06	1.26774	2.94446e-05	11.3549	up
Cinnamic acid	Phenolic acids	1.43383e+06	116157	1.2677	0.000785732	0.0810113	down
Vanillic acid	Phenolic acids	9	115393	1.26903	0.0039494	12821.5	up
3,4-Dihydroxybenzeneacetic acid	Phenolic acids	96518.7	9	1.2691	0.000330969	9.32462e-05	down
Homogentisic acid	Phenolic acids	90926.3	21746.7	1.25433	0.00354578	0.239168	down
4-Methoxycinnamic acid	Phenolic acids	13534.7	2280.03	1.25248	0.00734193	0.168459	down
Trans-4-Hydroxycinnamic Acid Methyl Ester	Phenolic acids	19106.3	5489.2	1.26525	6.53968e-06	0.287297	down
Syringic acid	Phenolic acids	9	34878	1.26887	0.00499311	3875.33	up
Trans-5-O-(p-Coumaroyl)shikimate	Phenolic acids	62263	9	1.26896	0.00358171	0.000144548	down
5-O-Caffeoylshikimic acid	Phenolic acids	94074	13825.7	1.26067	0.00474997	0.146966	down
Rosmarinic acid	Phenolic acids	15625.3	9	1.26794	0.0197464	0.000575988	down
Adenine	Nucleotides and derivatives	341660	1.43683e+06	1.26186	0.00690336	4.20545	up
2-Aminopurine	Nucleotides and derivatives	17081.7	585840	1.25636	0.0129462	34.2964	up
2-Deoxyribose-1-phosphate	Nucleotides and derivatives	243433	111910	1.25385	0.00672847	0.459715	down
Cytarabine	Nucleotides and derivatives	851580	405577	1.25312	0.000119164	0.476264	down
1-beta-D-Arabinofuranosyluracil	Nucleotides and derivatives	334617	1233100	1.2672	5.86259e-06	3.68511	up
Uridine	Nucleotides and derivatives	316060	1.48407e+06	1.26381	5.27249e-05	4.69552	up
5'-Deoxyadenosine	Nucleotides and derivatives	5715.13	112734	1.25526	0.00464928	19.7255	up
2'-Deoxyadenosine	Nucleotides and derivatives	8789.3	133923	1.24848	0.00332104	15.2371	up
Adenosine	Nucleotides and derivatives	3.10363e+06	6.00677e+07	1.26687	1.0541e-05	19.354	up
2'-O-Methyladenosine	Nucleotides and derivatives	19321	103564	1.23362	0.0161133	5.36018	up
Xanthosine	Nucleotides and derivatives	1.81417e+06	6.46473e+06	1.26727	0.000129924	3.56347	up
5'-Deoxy-5'-(methylthio)adenosine	Nucleotides and derivatives	8.38943e+06	980980	1.26338	0.0117342	0.11693	down
N7-Methylguanosine	Nucleotides and derivatives	92977.7	40186	1.19689	0.0454831	0.432211	down
N6-(2-Hydroxyethyl)adenosine	Nucleotides and derivatives	38254	17636	1.15519	0.0699245	0.461024	down
Cyclic 3',5'-Adenylic acid	Nucleotides and derivatives	9	28436.7	1.26893	0.00474394	3159.63	up
β-Nicotinamide mononucleotide	Nucleotides and derivatives	265843	47121.3	1.26205	0.00357845	0.177252	down
Adenosine 5'-monophosphate	Nucleotides and derivatives	2.92503e+06	17011000	1.26273	8.0579e-05	5.81566	up
3'-Adenylic Acid	Nucleotides and derivatives	8704.27	28077	1.06597	0.123185	3.22566	up
Inosine 5'-monophosphate	Nucleotides and derivatives	198623	1369600	1.24783	0.0113853	6.89546	up
Guanosine 5'-monophosphate	Nucleotides and derivatives	54147	119783	1.24563	0.000698364	2.21219	up
Uridine 5'-diphosphate	Nucleotides and derivatives	77773.3	36385.7	1.20563	0.0325382	0.467842	down
Adenosine 5'-diphosphate	Nucleotides and derivatives	92048.7	23611.3	1.20386	0.0164135	0.256509	down
Citicoline	Nucleotides and derivatives	13146.2	9	1.2623	0.125502	0.000684607	down
ATP; Adenosine 5'-Triphosphate	Nucleotides and derivatives	47750.7	9	1.26904	0.00176	0.000188479	down
Uridine 5'-diphospho-D-glucose	Nucleotides and derivatives	1.61747e+06	9	1.26909	0.00166181	5.56426e-06	down
NADP (Nicotinamide adenine dinucleotide phosphate)	Nucleotides and derivatives	213517	60607	1.21931	0.0156609	0.283851	down
Daidzein	Flavonoids	271957	1.80657e+06	1.25741	0.0149997	6.64285	up
3,9-Dihydroxypterocarpan	Flavonoids	127097	41808.7	1.24198	0.00038474	0.328952	down
Isoliquiritigenin	Flavonoids	116873	43285	1.25743	0.00208415	0.370358	down
2,4,4'-trihydroxychalcone	Flavonoids	105640	40478.7	1.24528	0.000585627	0.383176	down
6-Hydroxy-2'-methoxyflavone	Flavonoids	9	20535.3	1.26618	0.0622477	2281.7	up
Apigenin	Flavonoids	61464.7	222430	1.26139	0.00173735	3.61883	up
3',4',7-Trihydroxyflavone	Flavonoids	111410	434603	1.26207	0.000337461	3.90094	up
Genistein	Flavonoids	146803	557240	1.26538	0.000377663	3.79583	up
Butin	Flavonoids	272983	124967	1.25719	0.000161111	0.457781	down
Naringenin (5,7,4'-Trihydroxyflavanone)	Flavonoids	205463	102393	1.24585	0.010654	0.498353	down
Glycitein	Flavonoids	17080	53255	1.18887	0.0796364	3.11797	up
3',7-dihydroxy-4'-methoxyflavone	Flavonoids	163843	536827	1.24554	0.00580456	3.27646	up
Calycosin	Flavonoids	24142	88382.3	1.19699	0.0649891	3.66094	up
6''-O-Acetyldaidzin	Flavonoids	5.18193e+06	986457	1.26822	0.00123705	0.190365	down
Apigenin-7-O-(6''-acetyl)glucoside	Flavonoids	5.81217e+06	1076300	1.26423	0.00851091	0.185181	down
6''-O-Acetylgenistin	Flavonoids	277610	55288.3	1.24615	0.0196266	0.199158	down
6''-O-Acetylglycitin	Flavonoids	82185.3	26854.3	1.25201	0.0121307	0.326753	down
Kaempferide-3-O-(6''-malonyl)glucoside	Flavonoids	400787	163687	1.24773	0.00878875	0.408413	down
Luteolin-6,8-di-C-glucoside	Flavonoids	6340	29662.7	1.23759	0.0279893	4.67865	up
Nicotinamide	Others	157553	9	1.26841	0.0283668	5.71235e-05	down
Isonicotinic acid	Others	642943	165897	1.26317	0.000429708	0.258027	down
Nicotinic acid (Vitamin B3)	Others	916673	232643	1.2498	0.000841502	0.253791	down
3-Dehydro-L-Threonic Acid*	Others	9.99687e+06	1569300	1.2673	3.66178e-05	0.156979	down
D-Threonic Acid	Others	210940	64118	1.26206	3.34171e-05	0.303963	down
1,6-anhydro-β-D-glucose	Others	58179	2550.93	1.04522	0.000163043	0.0438463	down
1,5-Anhydro-D-glucitol	Others	57684	150387	1.1724	0.0219751	2.60708	up
D-Fucose	Others	29509.3	65288	1.12267	0.0241409	2.21245	up
Pyridoxine	Others	106369	480033	1.24052	0.000389345	4.51292	up
Dihydroxyacetone phosphate	Others	110893	9	1.26887	0.00860734	8.11591e-05	down
L-Ascorbic acid (Vitamin C)	Others	845627	149723	1.26185	0.00406594	0.177056	down
Erythorbic Acid; Isoascorbic Acid	Others	141020	47734.3	1.20986	0.0126384	0.338493	down
D-Glucurono-6,3-lactone	Others	70434	27838	1.21859	0.0176803	0.395235	down
Inositol*	Others	2085700	307670	1.26487	0.00181817	0.147514	down
D-Fructose*	Others	2.03553e+06	330220	1.26428	0.00819435	0.162228	down
D-Mannose*	Others	2.75297e+06	336990	1.26806	0.00119197	0.12241	down
D-Galactose*	Others	2.25737e+06	318207	1.26623	0.00347232	0.140964	down
D-Glucose*	Others	2.20043e+06	319833	1.26171	0.00160284	0.14535	down
D-Galacturonic acid*	Others	4884000	1.92273e+06	1.2645	0.000155871	0.39368	down
D-Glucoronic acid*	Others	5539600	2.34853e+06	1.26372	0.00174105	0.423954	down
Gluconic acid	Others	1.59803e+06	5.10717e+06	1.26786	3.85921e-07	3.19591	up
D-Erythrose-4-phosphate	Others	69260.7	6403.73	1.2659	0.00192795	0.0924584	down
N-Acetyl-D-mannosamine	Others	98839.7	897613	1.26671	0.00475517	9.08151	up
Biotin	Others	47098.3	21657	1.10862	0.0289954	0.459825	down
Glucose-1-phosphate*	Others	8.28617e+06	25749	1.26815	0.00266545	0.00310747	down
D-Glucose 6-phosphate*	Others	9.56393e+06	17701.3	1.26828	0.00177987	0.00185084	down
D-Fructose 6-Phosphate	Others	6243100	18963.7	1.269	0.000467916	0.00303754	down
Vidarabine	Others	3.44687e+06	5.23703e+07	1.26351	2.13737e-05	15.1936	up
Kushenin	Others	5068	13633.9	1.1328	0.0788022	2.6902	up
Pyridoxine-5'-O-glucoside	Others	127014	440313	1.23533	0.00257463	3.46666	up
Riboflavin (Vitamin B2)	Others	127014	51769.3	1.17239	0.0654847	0.407589	down
D-Maltotetraose	Others	117823	388320	1.26414	0.000470703	3.29578	up
Stachyose	Others	1.26383e+06	5060400	1.26845	0.000378079	4.00401	up
Nystose	Others	1.45267e+06	5.74827e+06	1.26257	0.00449151	3.95704	up
Verbascose	Others	7335.67	18517	1.10241	0.0468166	2.52424	up
Histamine	Alkaloids	27464.3	9	1.26846	0.0167301	0.000327698	down
2(3H)-Benzothiazolone	Alkaloids	11987	4093.37	1.24268	0.0014624	0.341484	down
DL-2-Aminoadipic acid	Alkaloids	2.34027e+06	857040	1.24419	0.0103756	0.366215	down
Candicine	Alkaloids	39709	4764.3	1.25746	0.00207309	0.11998	down
Vicine	Alkaloids	59770.3	122430	1.19234	0.00953244	2.04834	up
N-Oleoylethanolamine	Alkaloids	34787.3	278097	1.26476	0.000326051	7.99419	up
Azukisaponin IV	Terpenoids	26318.3	12027.3	1.17196	0.00621196	0.456994	down
Succinic anhydride	Organic acids	654380	111997	1.26395	0.00610573	0.171149	down
Succinic acid*	Organic acids	39516000	7596200	1.26816	0.000787165	0.192231	down
D-Erythronolactone	Organic acids	48757.7	9	1.26882	0.00677661	0.000184586	down
Methylmalonic acid*	Organic acids	3.98153e+07	7.48457e+06	1.26767	0.00140767	0.187982	down
Aminomalonic acid	Organic acids	1.33713e+06	230767	1.26	4.10356e-05	0.172583	down
2-Picolinic acid	Organic acids	359577	100868	1.249	0.00168039	0.280518	down
Glutaric acid	Organic acids	55922.3	130023	1.25852	0.00130758	2.32507	up
3-Ureidopropionic Acid	Organic acids	125697	16350	1.26101	0.00077729	0.130075	down
2-Hydroxyisocaproic acid	Organic acids	46380.7	328493	1.26511	0.00451081	7.08255	up
Iminodiacetic acid	Organic acids	906847	279850	1.26572	0.00077358	0.308597	down
L-Malic acid*	Organic acids	73550000	1.30653e+07	1.26733	2.94421e-05	0.177639	down
2,3-Dimethylsuccinic acid	Organic acids	23623	106403	1.24939	0.0185939	4.5042	up
4-Acetamidobutyric acid	Organic acids	27497.7	69309.3	1.14035	0.00984577	2.52055	up
2,2-Dimethylsuccinic acid	Organic acids	29980.7	9	1.26889	0.00554001	0.000300193	down
Adipic Acid*	Organic acids	86952.7	356843	1.25435	0.0071621	4.10388	up
2-Methylglutaric acid*	Organic acids	84880	277797	1.24871	0.00635424	3.27282	up
2-Oxoadipic acid	Organic acids	49295.7	19667	1.25306	0.0142833	0.39896	down
Choline Alfoscerate	Lipids	577667	3.11273e+06	1.26766	0.000895911	5.38846	up
Crepenynic acid	Lipids	27522.3	11161.9	1.25416	0.000852382	0.405557	down
γ-Linolenic Acid*	Lipids	2.72597e+07	11669000	1.26266	0.00315044	0.428068	down
α-Linolenic Acid*	Lipids	2.48587e+07	1.07583e+07	1.26491	0.000353375	0.43278	down
Punicic acid (9Z,11E,13Z-octadecatrienoic acid)	Lipids	130557	676893	1.12662	0.191414	5.18467	up
Petroselinic acid	Lipids	1.87667e+07	7.05143e+06	1.25797	0.000419643	0.375742	down
Elaidic Acid	Lipids	6.95887e+07	2.67753e+07	1.26427	0.00101631	0.384766	down
11-Octadecanoic acid(Vaccenic acid)	Lipids	16118000	5301900	1.26496	3.00451e-05	0.328943	down
17-Hydroxylinolenic acid	Lipids	9	539997	1.26487	0.168666	59999.6	up
13S-Hydroxy-9Z,11E,15Z-octadecatrienoic acid	Lipids	2104.13	35168.3	1.2552	0.0174822	16.7139	up
9S-Hydroxy-10E,12Z-octadecadienoic acid*	Lipids	24544	189433	1.18236	0.156074	7.71811	up
13(S)-HODE;13(S)-Hydroxyoctadeca-9Z,11E-dienoic acid*	Lipids	23439.3	196403	1.18449	0.16526	8.37922	up
9(10)-EpOME;(9R,10S)-(12Z)-9,10-Epoxyoctadecenoic acid	Lipids	9	10039.4	1.26349	0.0960184	1115.49	up
1-Eicosanol	Lipids	284743	107777	1.23293	0.00217145	0.378505	down
5S,8R-DiHODE; (5S,8R,9Z,12Z)-5,8-Dihydroxyoctadeca-9,12-dienoate	Lipids	9	24895	1.26537	0.0894101	2766.11	up
9-Hydroxy-12-oxo-15(Z)-octadecenoic acid	Lipids	9	22847.7	1.26338	0.125786	2538.63	up
Hydroxy ricinoleic acid	Lipids	442.6	27922	1.11115	0.158187	63.0863	up
Ethyl 9-Hydroxy-10,12-octadecadienoic acid	Lipids	5312.07	44066.7	1.26219	4.83399e-05	8.29558	up
9,12,13-Trihydroxy-10,15-octadecadienoic acid	Lipids	7964.77	9	1.26854	0.0084386	0.00112998	down
9,10,13-Trihydroxy-11-Octadecenoic Acid	Lipids	8950.23	73865.3	1.1955	0.144754	8.25289	up
9,10-Dihydroxy-12,13-epoxyoctadecanoic acid	Lipids	9	26443	1.26616	0.0701165	2938.11	up
9,12,13-TriHOME; 9(S),12(S),13(S)-Trihydroxy-10(E)-octadecenoic acid	Lipids	13631	106800	1.19572	0.136879	7.83508	up
2-α-Linolenoyl-glycerol	Lipids	192777	19675	1.26462	0.00456152	0.102061	down
1-α-Linolenoyl-glycerol	Lipids	676020	26180.3	1.26801	0.00108128	0.0387272	down
2-Linoleoylglycerol	Lipids	108987	39606.3	1.26587	0.000445225	0.363405	down
1-Linoleoylglycerol	Lipids	214973	39256.3	1.2658	2.75633e-05	0.18261	down
LysoPE 14:0	Lipids	3469.1	63789	1.23387	0.00232525	18.3878	up
LysoPE 15:0	Lipids	5868.57	65612.7	1.26381	0.00519927	11.1804	up
LysoPE 16:0	Lipids	996413	9.48817e+06	1.26829	0.000963039	9.52232	up
LysoPE 16:0(2n isomer)	Lipids	215340	1.94417e+06	1.26547	3.04357e-05	9.02836	up
LysoPC 14:0	Lipids	22474.7	167993	1.26753	2.12655e-07	7.47479	up
LysoPE 18:2(2n isomer)	Lipids	1.66817e+06	1.16447e+07	1.26736	8.76933e-05	6.98052	up
LysoPE 18:2	Lipids	963283	7.01347e+06	1.26796	0.000779534	7.28079	up
LysoPE 18:1	Lipids	219327	1.61717e+06	1.26614	4.30242e-06	7.37332	up
LysoPE 18:1(2n isomer)	Lipids	197247	2.22803e+06	1.26887	8.45757e-05	11.2957	up
LysoPC 15:0	Lipids	11107.3	116382	1.26268	0.0148538	10.4779	up
LysoPE 18:0	Lipids	36895.3	144893	1.26464	5.91222e-05	3.92715	up
LysoPC 16:1(2n isomer)	Lipids	26002.7	98538.7	1.24712	0.00917051	3.78956	up
LysoPC 16:1	Lipids	47863	104248	1.24209	0.0168378	2.17805	up
LysoPC 16:0(2n isomer)	Lipids	544883	2.43283e+06	1.25756	0.0121282	4.46487	up
LysoPC 16:0	Lipids	3.31723e+06	2.09073e+07	1.26793	0.00182991	6.30264	up
LysoPC 17:1	Lipids	16548.3	44670	1.20402	0.0200949	2.69937	up
2-α-Linolenoyl-glycerol-1-O-glucoside	Lipids	4012.13	9	1.26291	0.0866067	0.0022432	down
1-α-Linolenoyl-glycerol-3-O-glucoside	Lipids	7413.07	9	1.26895	0.00351788	0.00121407	down
LysoPC 18:0(2n isomer)	Lipids	53268.3	178707	1.25948	0.000711793	3.35484	up
LysoPC 18:0	Lipids	203653	965200	1.2669	0.00312065	4.73943	up
LysoPC 20:2	Lipids	10342.1	42984.3	1.2287	0.000253157	4.15623	up
LysoPC 20:2(2n isomer)	Lipids	10827.2	37815	1.20557	0.00210402	3.49258	up
