# Supplementary material for: Combined Metabolomic and Quantitative RT-PCR Analyses Revealed the Synthetic Differences of 2-Acetyl-1-pyrroline in Aromatic and Non-Aromatic Vegetable Soybeans
Source: Int J Mol Sci. 2022 Nov 22;23(23):14529. doi: 10.3390/ijms232314529 (PMC9738111; doi:10.3390/ijms232314529)
Supplement: Supplementary file 1 [file ijms-23-14529-s001.zip › ijms-1956011-supplementary/Table S6.xlsx]

## Sheet: Sheet1
Table S6 differential accumulation metabolites (DAMs) in ZX8-S5 and ZK1754-S6 (* indicates the racemates)
Compounds	Class I	ZX8-S5	ZK1754-S6	VIP	p_value	Fold_Change	Type
N-Methylglycine	Amino acids and derivatives	24611	9	1.17063	0.00016341	0.00036569	down
L-Alanine	Amino acids and derivatives	11444.3	1566.5	1.03725	0.0129763	0.136881	down
L-Azetidine-2-carboxylic acid	Amino acids and derivatives	1.15087e+06	565783	1.16165	0.00283389	0.491615	down
N,N-Dimethylglycine	Amino acids and derivatives	3.36093e+06	1207900	1.16923	4.85428e-06	0.359394	down
L-Serine	Amino acids and derivatives	2.43337e+06	500733	1.17023	7.61422e-05	0.205778	down
L-Proline	Amino acids and derivatives	2.90877e+07	13705000	1.16387	0.00445975	0.471162	down
L-Valine	Amino acids and derivatives	5.66023e+07	2.34033e+07	1.17025	8.77184e-05	0.413469	down
L-Threonine*	Amino acids and derivatives	1634300	607510	1.16006	0.00170809	0.371725	down
L-Homoserine*	Amino acids and derivatives	1.55647e+06	610880	1.13985	0.00769626	0.392479	down
L-Leucine*	Amino acids and derivatives	23079000	6.78213e+06	1.16834	5.33432e-05	0.293866	down
L-Norleucine	Amino acids and derivatives	1.81767e+06	481390	1.16685	2.58952e-06	0.26484	down
L-Isoleucine*	Amino acids and derivatives	1.10957e+07	2.44723e+06	1.16522	0.00237925	0.220558	down
L-Asparagine	Amino acids and derivatives	9.18657e+06	629697	1.16474	0.0174617	0.0685454	down
L-Ornithine	Amino acids and derivatives	80612.3	9044.87	1.15668	0.0136668	0.112202	down
L-Aspartic Acid	Amino acids and derivatives	1.82477e+07	2.78473e+06	1.17033	0.000452415	0.152608	down
S-Methyl-L-cysteine	Amino acids and derivatives	1.28513e+06	224290	1.16944	0.00193147	0.174527	down
L-Glutamic acid	Amino acids and derivatives	55170000	16549000	1.16923	7.73373e-06	0.299964	down
L-threo-3-Methylaspartate	Amino acids and derivatives	4.70297e+06	466573	1.16998	0.00070321	0.0992083	down
(2S,3R,4S)-4-Hydroxyisoleucine	Amino acids and derivatives	670993	122661	1.1505	4.33822e-05	0.182805	down
4-Hydoxy-L-Isoleucine	Amino acids and derivatives	611107	145063	1.1575	3.05236e-05	0.237378	down
L-Methionine	Amino acids and derivatives	14068000	2.11103e+06	1.16319	0.00870751	0.150059	down
L-Histidine	Amino acids and derivatives	8.35157e+07	1.85137e+07	1.1616	0.0136582	0.221679	down
N-Methyl-L-Glutamate	Amino acids and derivatives	58251.7	9	1.17063	0.00036556	0.000154502	down
L-Methionine methyl ester	Amino acids and derivatives	86437.7	9	1.17038	0.0100563	0.000104121	down
L-Glycyl-L-proline	Amino acids and derivatives	144307	52335.7	1.12197	0.035199	0.36267	down
N-α-Acetyl-L-ornithine	Amino acids and derivatives	1.65633e+06	388720	1.16837	2.13717e-05	0.234687	down
L-Arginine	Amino acids and derivatives	7828300	2.84037e+06	1.16142	0.00144394	0.362833	down
L-Tyrosine	Amino acids and derivatives	27179000	5454800	1.16436	1.70461e-05	0.200699	down
N-Glycyl-L-leucine*	Amino acids and derivatives	155637	345900	1.05522	0.0242307	2.22248	up
L-Glycyl-L-isoleucine*	Amino acids and derivatives	309300	939363	1.16903	0.000458687	3.03706	up
Homoarginine	Amino acids and derivatives	485480	147183	1.16371	0.00343687	0.303171	down
N-Monomethyl-L-arginine	Amino acids and derivatives	2.11953e+06	686290	1.15353	0.0060568	0.323793	down
N-Acetyl-L-glutamic acid	Amino acids and derivatives	268810	89231.7	1.14259	0.000214139	0.331951	down
N-Acetyl-L-Methionine	Amino acids and derivatives	34693	7913.73	1.12267	0.00133668	0.228107	down
L-Tyrosine methyl ester	Amino acids and derivatives	35267.3	12960.3	1.12515	0.0291712	0.367488	down
5-Hydroxy-L-tryptophan	Amino acids and derivatives	49009	105781	1.1171	0.00156971	2.15839	up
Glycylphenylalanine	Amino acids and derivatives	71944	600567	1.13729	0.0162648	8.3477	up
N-Acetyl-L-tyrosine	Amino acids and derivatives	14066.7	6017.1	1.06885	0.0623694	0.427756	down
L-Alanyl-L-Phenylalanine	Amino acids and derivatives	29963.7	105377	1.13084	0.000521318	3.51684	up
L-Leucyl-L-Leucine	Amino acids and derivatives	110703	29518.3	1.12494	0.000585262	0.266644	down
L-Isoleucyl-L-Aspartate	Amino acids and derivatives	205020	90959	1.10331	0.0280761	0.443659	down
L-γ-Glutamyl-L-leucine	Amino acids and derivatives	168967	1.15477e+06	1.16335	6.09334e-05	6.83429	up
Glycyl-tryptophan	Amino acids and derivatives	678973	1.37667e+06	1.13123	0.00109875	2.02757	up
L-Valyl-L-Phenylalanine	Amino acids and derivatives	20454	86852	1.14499	0.0232366	4.24621	up
L-Homocystine	Amino acids and derivatives	11183.2	133313	1.13617	0.0139575	11.9209	up
γ-Glutamylphenylalanine	Amino acids and derivatives	2.02783e+06	3.65593e+07	1.16937	0.000315089	18.0288	up
γ-Glutamyltyrosine	Amino acids and derivatives	389683	1.59463e+06	1.16723	2.24806e-05	4.09213	up
Tryptophan glutamic acid	Amino acids and derivatives	32228.7	10174	1.1224	0.0316384	0.315681	down
S-Adenosyl-L-methionine	Amino acids and derivatives	315040	23905	1.16059	0.00229821	0.0758793	down
2,5-Dihydroxybenzaldehyde*	Phenolic acids	156683	1.06439e+06	1.16425	0.00112832	6.79328	up
4-Hydroxybenzoic acid	Phenolic acids	326297	2218600	1.16901	0.000643958	6.79933	up
Protocatechualdehyde*	Phenolic acids	199943	1.44567e+06	1.16995	4.42941e-05	7.23038	up
Cinnamic acid	Phenolic acids	2.99483e+06	116157	1.16983	0.000789192	0.0387857	down
2-Hydroxycinnamic acid	Phenolic acids	231920	115177	1.12861	0.0210674	0.496622	down
Vanillic acid	Phenolic acids	9	115393	1.17055	0.0039494	12821.5	up
3,4-Dihydroxybenzeneacetic acid	Phenolic acids	71306.3	9	1.17052	0.00368446	0.000126216	down
Homogentisic acid	Phenolic acids	65629.3	21746.7	1.15235	0.000549436	0.331356	down
4-Methoxycinnamic acid	Phenolic acids	7238.23	2280.03	1.14822	0.00229688	0.314999	down
Trans-4-Hydroxycinnamic Acid Methyl Ester	Phenolic acids	12073.3	5489.2	1.14854	0.00741466	0.454655	down
Methyl caffeate	Phenolic acids	27220.7	74503	1.12622	0.000648133	2.737	up
Syringic acid	Phenolic acids	9	34878	1.17046	0.00499311	3875.33	up
1-O-Salicyl-D-glucose	Phenolic acids	295917	105458	1.15174	0.000187214	0.356376	down
Salicylic acid-2-O-glucoside	Phenolic acids	2.37007e+06	1.08357e+06	1.16001	0.0020156	0.457188	down
Methyl salicylate-2-O-glucoside	Phenolic acids	39777.7	93069.7	1.16562	0.00207432	2.33975	up
Trans-5-O-(p-Coumaroyl)shikimate	Phenolic acids	115763	9	1.17002	0.0196807	7.7745e-05	down
1-O-Vanilloyl-D-Glucose	Phenolic acids	289837	707803	1.15804	0.00179907	2.44208	up
Vanillic acid-4-O-glucoside	Phenolic acids	8983.07	31738.7	1.05588	0.0154677	3.53317	up
2,4,6-trihydroxy-acetophenone-4-O-β-D-glucopyranoside	Phenolic acids	1.09103e+06	2.58983e+06	1.15659	0.000113217	2.37374	up
3,4,5-Trimethoxyphenyl-1-O-Glucoside	Phenolic acids	3055400	7.94657e+06	1.16525	0.0050984	2.60083	up
5-O-Caffeoylshikimic acid	Phenolic acids	73978	13825.7	1.15244	0.0184529	0.186889	down
Rosmarinic acid	Phenolic acids	24428.3	9	1.16995	0.0169264	0.000368425	down
Gallein	Phenolic acids	40900.3	19756.3	1.13419	0.00431412	0.483036	down
Adenine	Nucleotides and derivatives	546070	1.43683e+06	1.15538	0.00897168	2.63123	up
2-Aminopurine	Nucleotides and derivatives	25963.3	585840	1.16099	0.0133589	22.5641	up
1-Methyladenine	Nucleotides and derivatives	252403	47756	1.14954	0.000272923	0.189205	down
Isoguanine	Nucleotides and derivatives	433063	95263	1.15694	0.0010247	0.219975	down
6-O-methylguanine	Nucleotides and derivatives	64361	11711	1.15518	0.000907385	0.181958	down
2-Deoxyribose-1-phosphate	Nucleotides and derivatives	392193	111910	1.15791	0.0139075	0.285344	down
Thymidine	Nucleotides and derivatives	30032.7	9375.77	1.05893	0.0365424	0.312186	down
Cytidine	Nucleotides and derivatives	1264000	528480	1.15201	0.00164883	0.418101	down
Cytarabine	Nucleotides and derivatives	1126300	405577	1.16377	0.000197098	0.360096	down
1-beta-D-Arabinofuranosyluracil	Nucleotides and derivatives	130347	1233100	1.1691	2.0559e-05	9.46016	up
Uridine	Nucleotides and derivatives	116940	1.48407e+06	1.16728	0.000201627	12.6908	up
5'-Deoxyadenosine	Nucleotides and derivatives	9330.53	112734	1.15473	0.00385204	12.0822	up
2'-Deoxyadenosine	Nucleotides and derivatives	12061	133923	1.16899	0.00488202	11.1038	up
Adenosine	Nucleotides and derivatives	3449300	6.00677e+07	1.17032	8.50905e-05	17.4145	up
2'-Deoxyguanosine	Nucleotides and derivatives	46516	16612	1.12724	0.00121469	0.357124	down
9-(Arabinosyl)hypoxanthine	Nucleotides and derivatives	38946.7	80744	1.09963	0.0314467	2.07319	up
2'-O-Methyladenosine	Nucleotides and derivatives	14970.9	103564	1.13353	0.0140064	6.9177	up
Xanthosine	Nucleotides and derivatives	802363	6.46473e+06	1.17036	0.000460146	8.05711	up
5'-Deoxy-5'-(methylthio)adenosine	Nucleotides and derivatives	1.11287e+07	980980	1.16971	0.00211107	0.0881489	down
Cyclic 3',5'-Adenylic acid	Nucleotides and derivatives	9	28436.7	1.17048	0.00474394	3159.63	up
2'-Deoxyadenosine-5'-monophosphate	Nucleotides and derivatives	75044.3	209500	1.07774	0.0870702	2.79168	up
2'-Deoxyinosine-5'-monophosphate	Nucleotides and derivatives	1.89537e+06	4178500	1.14526	0.00134435	2.20459	up
β-Nicotinamide mononucleotide	Nucleotides and derivatives	200077	47121.3	1.16226	0.00215023	0.235516	down
Adenosine 5'-monophosphate	Nucleotides and derivatives	3.41193e+06	17011000	1.16732	0.000249707	4.98574	up
Inosine 5'-monophosphate	Nucleotides and derivatives	225860	1369600	1.13152	0.00968992	6.06393	up
Ribosyladenosine	Nucleotides and derivatives	18429.7	75098	1.06242	0.0478338	4.07484	up
Adenosine 5'-diphosphate	Nucleotides and derivatives	71100.3	23611.3	1.1005	0.00381839	0.332085	down
Citicoline	Nucleotides and derivatives	23900	9	1.16998	0.0173332	0.000376569	down
ATP; Adenosine 5'-Triphosphate	Nucleotides and derivatives	27767.7	9	1.16954	0.0332269	0.000324118	down
Uridine 5'-diphospho-D-glucose	Nucleotides and derivatives	2.30643e+06	9	1.17059	0.00242102	3.90213e-06	down
NADP (Nicotinamide adenine dinucleotide phosphate)	Nucleotides and derivatives	277123	60607	1.15055	0.000147515	0.2187	down
Daidzein	Flavonoids	123130	1.80657e+06	1.1659	0.0129214	14.672	up
3,9-Dihydroxypterocarpan	Flavonoids	85256.7	41808.7	1.11195	0.00475496	0.490386	down
Liquiritigenin	Flavonoids	180080	1.47867e+06	1.16962	0.000641608	8.21117	up
6-Hydroxy-2'-methoxyflavone	Flavonoids	9	20535.3	1.16808	0.0622477	2281.7	up
Apigenin	Flavonoids	61129.3	222430	1.16643	0.0029976	3.63868	up
3',4',7-Trihydroxyflavone	Flavonoids	104364	434603	1.16237	0.000257316	4.16429	up
Genistein	Flavonoids	137210	557240	1.16736	0.00040086	4.06122	up
Butin	Flavonoids	712430	124967	1.16781	0.00164332	0.175409	down
Naringenin (5,7,4'-Trihydroxyflavanone)	Flavonoids	534610	102393	1.16992	4.9324e-06	0.191529	down
Glycitein	Flavonoids	10506	53255	1.10959	0.0567957	5.06902	up
3',7-dihydroxy-4'-methoxyflavone	Flavonoids	117267	536827	1.12436	0.00168299	4.5778	up
Calycosin	Flavonoids	18838.7	88382.3	1.10504	0.0538666	4.69154	up
Liquiritigenin-4'-O-Glucoside (Liquiritin)	Flavonoids	229400	1380300	1.16781	0.00422727	6.017	up
Apigenin-5-O-glucoside	Flavonoids	1.63103e+06	8454000	1.16211	1.859e-05	5.18322	up
Butin-7-O-glucoside	Flavonoids	2057300	1022280	1.14188	0.00644868	0.496904	down
Glycitin	Flavonoids	1259800	2.52697e+06	1.0982	0.0482989	2.00585	up
Luteolin-3'-O-glucoside	Flavonoids	224723	781160	1.15968	0.0107225	3.4761	up
Kaempferol-3-O-glucoside (Astragalin)	Flavonoids	247200	865737	1.16278	0.0023823	3.50217	up
Luteolin-4'-O-glucoside	Flavonoids	236523	886430	1.16602	6.6314e-05	3.74775	up
Kaempferol-3-O-galactoside (Trifolin)	Flavonoids	29762.3	87833.3	1.15897	7.43516e-05	2.95116	up
Kaempferol-7-O-glucoside	Flavonoids	25452.7	91264.3	1.13751	0.000414822	3.58565	up
Aureusidin-4-O-glucoside	Flavonoids	288577	1035610	1.105	0.00733433	3.58868	up
6''-O-Acetyldaidzin	Flavonoids	2.79367e+06	986457	1.16688	0.00367761	0.353105	down
Pratensein-7-O-glucoside	Flavonoids	282880	140493	1.14933	0.00863432	0.496653	down
Apigenin-7-O-(6''-acetyl)glucoside	Flavonoids	4.65323e+06	1076300	1.17047	0.000229826	0.231302	down
6''-O-Acetylgenistin	Flavonoids	206053	55288.3	1.15627	4.85618e-05	0.26832	down
5,2'-Dihydroxy-7,8-dimethoxyflavone glycosides	Flavonoids	43017.3	18018	1.13959	0.0252246	0.418854	down
Kaempferol-3-O-(6''-acetyl)glucoside	Flavonoids	195967	776927	1.1415	0.00157972	3.96459	up
Genistein-7-O-(6''-malonyl)glucoside	Flavonoids	337820	972280	1.10235	0.00224799	2.8781	up
Kaempferol-3-O-(6''-malonyl)glucoside*	Flavonoids	999207	4136800	1.16719	0.000108752	4.14008	up
Kaempferol-3-O-(6''-malonyl)galactoside*	Flavonoids	1218400	4.15043e+06	1.15215	0.000163136	3.40646	up
Diosmetin-7-O-(6''-malonyl)glucoside	Flavonoids	11556.3	25717.3	1.15028	0.00124854	2.22539	up
Daidzein-7-O-apiosyl(1→6)glucoside	Flavonoids	206030	823457	1.16366	0.00223101	3.99678	up
Daidzein-7-O-Glucoside-4'-O-Apioside	Flavonoids	2.31237e+06	1.01142e+06	1.03883	0.0208071	0.437395	down
Apigenin-8-C-(2''-xylosyl)glucoside*	Flavonoids	51469.3	191183	1.05774	0.0899202	3.71451	up
Apigenin-6-C-(2''-xylosyl)glucoside*	Flavonoids	31016	182737	1.1547	0.0225158	5.89169	up
Hispidulin-8-C-(2''-O-xylosyl)xyloside	Flavonoids	693887	308280	1.11558	0.0282687	0.44428	down
Pinocembrin-7-O-neohesperidoside	Flavonoids	9	35482.3	1.17056	0.00259347	3942.48	up
Kaempferol-3-O-sambubioside	Flavonoids	30357.7	9	1.17063	0.000432368	0.000296465	down
Kaempferol-3-O-rutinoside(Nicotiflorin)	Flavonoids	24695.3	52004.7	1.08954	0.00364805	2.10585	up
Kaempferol-3-O-neohesperidoside	Flavonoids	718237	1.93047e+06	1.16879	0.000722572	2.68779	up
Luteolin-7-O-neohesperidoside (Lonicerin)	Flavonoids	703553	1973400	1.16948	1.71411e-06	2.8049	up
Luteolin-6,8-di-C-glucoside	Flavonoids	9	29662.7	1.16987	0.0186864	3295.85	up
Kaempferol-3,7-di-O-glucoside	Flavonoids	25857.3	54927.7	1.01603	0.0197124	2.12426	up
Luteolin-7-O-(6''-malonyl)glucoside-5-O-rhamnoside	Flavonoids	222100	590717	1.16762	9.72259e-05	2.65969	up
Isovitexin-2''-O-(6'''-p-coumaroyl)glucoside	Flavonoids	9	466067	1.17064	0.000412501	51785.2	up
2,6-Dimethoxy-1,4-benzoquinone	Quinones	495333	1.1379e+06	1.14496	0.0135331	2.29723	up
Physcion-8-O-(6-acetyl)-glucoside	Quinones	3687.67	10337.6	1.15134	0.00487628	2.80328	up
Pinoresinol-4-O-(6''-acetyl)glucoside	Lignans and Coumarins	112762	239010	1.12851	0.000981986	2.1196	up
D-Threose	Others	96121.3	10448.1	1.14742	0.000639154	0.108697	down
Nicotinamide	Others	34404.3	9	1.17054	0.00282739	0.000261595	down
Isonicotinic acid	Others	736363	165897	1.1664	0.000324659	0.225292	down
Nicotinic acid (Vitamin B3)	Others	942537	232643	1.15322	0.0014129	0.246827	down
5-Hydroxymethylfurfural	Others	298867	677013	1.12764	0.00908578	2.26527	up
4-Guanidinobutanal	Others	1.80327e+07	5234500	1.15595	0.00955046	0.290279	down
3-Dehydro-L-Threonic Acid*	Others	1.43953e+07	1569300	1.16952	2.91261e-08	0.109014	down
D-Threonic Acid	Others	210393	64118	1.15234	0.0117184	0.304753	down
D-Arabinose	Others	222837	108376	1.08909	0.0147437	0.486349	down
D-Ribose	Others	75375.3	33611.7	1.13066	0.0096604	0.445924	down
D-Arabitol*	Others	40645.7	84748.7	1.0681	0.0252846	2.08506	up
Ribitol*	Others	45597.3	96421	1.09446	0.0123682	2.11462	up
Xylitol	Others	25313.7	62071	1.15073	0.0087909	2.45207	up
1,5-Anhydro-D-glucitol	Others	66325.3	150387	1.03277	0.0250522	2.26741	up
Pyridoxine	Others	43140.7	480033	1.16807	0.00263981	11.1272	up
Dihydroxyacetone phosphate	Others	76280.3	9	1.17027	0.0127366	0.000117986	down
L-Ascorbic acid (Vitamin C)	Others	493617	149723	1.12566	0.0404574	0.303319	down
Erythorbic Acid; Isoascorbic Acid	Others	119267	47734.3	1.09587	0.0149633	0.400232	down
Inositol*	Others	2.64733e+06	307670	1.16806	0.000934927	0.116219	down
D-Fructose*	Others	2.83527e+06	330220	1.16977	0.00168446	0.116469	down
D-Mannose*	Others	3.37907e+06	336990	1.16979	0.00135644	0.0997287	down
D-Galactose*	Others	2.34343e+06	318207	1.16913	0.00174501	0.135787	down
D-Glucose*	Others	2.74053e+06	319833	1.16577	0.000421614	0.116705	down
Dulcitol*	Others	41183.7	132523	1.14901	0.00751456	3.21786	up
D-Mannitol*	Others	11342.3	35132	1.10918	0.0163734	3.09744	up
D-Sorbitol	Others	25907.3	71575.7	1.12662	0.00176305	2.76276	up
2,6-Dimethyl-7-octene-2,3,6-triol	Others	117433	25730.7	1.14603	0.00052681	0.219109	down
D-Galacturonic acid*	Others	278003	1.92273e+06	1.16848	0.000923298	6.91622	up
D-Glucoronic acid*	Others	368860	2.34853e+06	1.16554	2.51048e-05	6.367	up
D-Pinitol	Others	33950.3	68351	1.08737	0.00371466	2.01326	up
Gluconic acid	Others	286890	5.10717e+06	1.17061	6.09936e-05	17.8018	up
D-Erythrose-4-phosphate	Others	60740.3	6403.73	1.16493	0.00919756	0.105428	down
D-Galactaric acid*	Others	296250	1273000	1.16565	0.00392194	4.29705	up
D-Saccharic acid*	Others	726923	2.18263e+06	1.16805	4.58292e-06	3.00256	up
Sedoheptulose	Others	141271	590257	1.12093	0.000460696	4.17819	up
N-Acetyl-D-mannosamine	Others	49825.3	897613	1.16626	0.00402349	18.0152	up
Nicotinate D-ribonucleoside	Others	1317400	3.10187e+06	1.16347	0.00291986	2.35454	up
Glucose-1-phosphate*	Others	7544600	25749	1.16989	8.18586e-05	0.0034129	down
D-Glucose 6-phosphate*	Others	8631600	17701.3	1.16994	0.000586392	0.00205076	down
D-Fructose 6-Phosphate	Others	5.87177e+06	18963.7	1.17059	7.73717e-05	0.00322964	down
Vidarabine	Others	2.78163e+06	5.23703e+07	1.16917	0.000182983	18.8272	up
Kushenin	Others	3353.23	13633.9	1.08874	0.056043	4.06591	up
Pyridoxine-5'-O-glucoside	Others	160813	440313	1.15337	0.00790739	2.73804	up
D-Cellobiose	Others	84175	168923	1.07801	0.0479426	2.00681	up
Riboflavin (Vitamin B2)	Others	106397	51769.3	1.11923	0.008076	0.486569	down
Licoagroside B	Others	394337	795470	1.10059	0.0172497	2.01724	up
Calcium Pantothenate	Others	9113.47	32632.3	1.16301	0.00636512	3.58067	up
D-Panose*	Others	220413	1046900	1.16134	5.35829e-05	4.74971	up
Maltotriose	Others	615477	2247200	1.15314	0.00358109	3.65115	up
Raffinose*	Others	740990	4767200	1.16903	9.35583e-05	6.43356	up
D-Melezitose	Others	99656.7	516033	1.16003	0.00491047	5.17811	up
D-Maltotetraose	Others	23986.3	388320	1.15838	0.0001941	16.1892	up
Stachyose	Others	126640	5060400	1.17052	0.000340785	39.9589	up
Nystose	Others	158917	5.74827e+06	1.16899	0.00331689	36.1716	up
Maltopentaose	Others	8042.5	19129.7	1.00986	0.0230303	2.37857	up
Verbascose	Others	5825.2	18517	1.07987	0.0427234	3.17877	up
Azetidine-2-carboxylic acid	Alkaloids	1423300	513760	1.15518	0.000483297	0.360964	down
Histamine	Alkaloids	66223.7	9	1.17054	0.00357081	0.000135903	down
6-Deoxyfagomine	Alkaloids	4982800	1.29283e+06	1.16642	0.00260248	0.259459	down
N-benzylformamide	Alkaloids	2.64667e+06	553163	1.16571	0.00577773	0.209004	down
4-Hydroxymandelonitrile	Alkaloids	1.49077e+07	2.37617e+06	1.16998	0.00110999	0.159392	down
2(3H)-Benzothiazolone	Alkaloids	10615.2	4093.37	1.12989	0.00909529	0.385614	down
1-Methyl-6-Oxo-1,6-Dihydropyridine-3-Carboxamide	Alkaloids	15453.3	55600	1.13937	0.00385384	3.59793	up
DL-2-Aminoadipic acid	Alkaloids	9391600	857040	1.16812	0.00271715	0.091256	down
Candicine	Alkaloids	29572.3	4764.3	1.14668	0.0204278	0.161107	down
N-(2-Hydroxy-4-methoxyphenyl)acetamide	Alkaloids	15040000	3.05373e+06	1.16588	0.00737685	0.203041	down
3-Indoleacrylic acid	Alkaloids	8.87777e+06	1.85593e+07	1.15502	0.00261667	2.09054	up
N-Oleoylethanolamine	Alkaloids	108513	278097	1.1634	0.000178612	2.56279	up
Ixoroside	Terpenoids	32645.7	69051.3	1.00802	0.0679672	2.11518	up
Soyasaponin βc	Terpenoids	108840	218237	1.15812	0.00263753	2.00511	up
Compounds	Class I			VIP	p_value	Fold_Change	Type
Succinic anhydride	Organic acids	548670	111997	1.16801	0.00149896	0.204124	down
1-Aminocyclopropane-1-carboxylic acid	Organic acids	728367	183583	1.15745	0.00860108	0.252048	down
γ-Aminobutyric acid	Organic acids	4.33153e+06	1.05977e+06	1.16868	0.00104553	0.244663	down
Succinic acid*	Organic acids	4.31603e+07	7596200	1.16984	0.000941967	0.176	down
D-Erythronolactone	Organic acids	55834.3	9	1.16988	0.0216651	0.000161191	down
Methylmalonic acid*	Organic acids	43001000	7.48457e+06	1.16974	0.000901506	0.174056	down
Aminomalonic acid	Organic acids	1.43097e+06	230767	1.16321	3.46211e-06	0.161266	down
2-Picolinic acid	Organic acids	463553	100868	1.15551	0.00498606	0.217597	down
Imidazole-4-Acetic Acid*	Organic acids	306240	620477	1.13656	0.00344721	2.02611	up
L-Pipecolic Acid	Organic acids	20146000	5.90043e+06	1.16945	0.00078564	0.292884	down
3-Guanidinopropionic acid	Organic acids	73658	148757	1.14845	0.0102144	2.01956	up
6-Aminocaproic acid	Organic acids	1.50729e+06	298413	1.07188	0.0453187	0.19798	down
3-Ureidopropionic Acid	Organic acids	521213	16350	1.16815	0.000511894	0.0313691	down
2-Hydroxyisocaproic acid	Organic acids	68028.7	328493	1.16311	0.00434604	4.82875	up
6-Hydroxyhexanoic acid	Organic acids	9	52060.3	1.16998	0.0225015	5784.48	up
Iminodiacetic acid	Organic acids	1754600	279850	1.16846	0.00272097	0.159495	down
L-Malic acid*	Organic acids	9.52027e+07	1.30653e+07	1.16932	0.00022247	0.137237	down
1-Methylpiperidine-2-carboxylic acid	Organic acids	156770	483420	1.14762	0.000953717	3.08363	up
2,3-Dimethylsuccinic acid	Organic acids	8545.77	106403	1.14873	0.0132507	12.4509	up
2,2-Dimethylsuccinic acid	Organic acids	173290	9	1.17061	0.00149565	5.19361e-05	down
Adipic Acid*	Organic acids	95617.7	356843	1.16039	0.0095769	3.73198	up
2-Methylglutaric acid*	Organic acids	93722.3	277797	1.09425	0.00291126	2.96404	up
2-Propylsuccinic acid*	Organic acids	63112.7	27530.7	1.14656	0.000747557	0.436215	down
Azelaic acid	Organic acids	991630	238350	1.16736	0.000929745	0.240362	down
2,6-Diaminooimelic acid	Organic acids	473163	1.76083e+06	1.16623	0.00129687	3.72141	up
13-methylmyristic acid	Lipids	58229.7	27918.7	1.14345	0.0173291	0.479458	down
Choline Alfoscerate	Lipids	555237	3.11273e+06	1.16861	0.000644261	5.60614	up
10-Heptadecenoic Acid	Lipids	566990	176863	1.14326	0.0182905	0.311934	down
Crepenynic acid	Lipids	108923	11161.9	1.16898	0.000175311	0.102475	down
γ-Linolenic Acid*	Lipids	79300000	11669000	1.1701	0.000600614	0.14715	down
α-Linolenic Acid*	Lipids	7.48227e+07	1.07583e+07	1.16984	0.000824931	0.143784	down
(9Z,11E)-Octadecadienoic acid	Lipids	41982	20514.3	1.15455	0.000642729	0.488646	down
Petroselinic acid	Lipids	1.85293e+07	7.05143e+06	1.15709	0.00196633	0.380555	down
Elaidic Acid	Lipids	6.77487e+07	2.67753e+07	1.16482	0.00204477	0.395216	down
11-Octadecanoic acid(Vaccenic acid)	Lipids	1.49313e+07	5301900	1.16321	0.00178706	0.355086	down
17-Hydroxylinolenic acid	Lipids	60948.3	539997	1.07143	0.201369	8.85991	up
9(10)-EpOME;(9R,10S)-(12Z)-9,10-Epoxyoctadecenoic acid	Lipids	37646	10039.4	1.06398	0.00370669	0.266679	down
12,13-Epoxy-9-Octadecenoic Acid	Lipids	20554	4882.73	1.03606	0.00914679	0.237556	down
Ricinoleic acid	Lipids	424037	109883	1.15078	0.0113855	0.259136	down
1-Eicosanol	Lipids	590423	107777	1.15691	0.00711054	0.182541	down
Ethyl 9-Hydroxy-10,12-octadecadienoic acid	Lipids	18018.3	44066.7	1.1559	0.00193315	2.44566	up
9,12,13-Trihydroxy-10,15-octadecadienoic acid	Lipids	26380.7	9	1.17024	0.0103759	0.000341159	down
9,10-Dihydroxy-12,13-epoxyoctadecanoic acid	Lipids	6680.17	26443	1.07757	0.115103	3.95843	up
2-α-Linolenoyl-glycerol	Lipids	437437	19675	1.16939	6.62268e-05	0.0449779	down
1-α-Linolenoyl-glycerol	Lipids	2.08167e+06	26180.3	1.17016	0.000223629	0.0125766	down
2-Linoleoylglycerol	Lipids	199307	39606.3	1.16769	0.00378083	0.198721	down
1-Linoleoylglycerol	Lipids	767587	39256.3	1.16967	7.0997e-06	0.0511425	down
LysoPE 14:0	Lipids	5033.87	63789	1.14792	0.00213179	12.672	up
LysoPE 15:0	Lipids	12586.7	65612.7	1.15965	0.00484363	5.21287	up
LysoPE 16:0	Lipids	1.43837e+06	9.48817e+06	1.16912	0.000822682	6.59649	up
LysoPE 16:0(2n isomer)	Lipids	281660	1.94417e+06	1.17012	6.40601e-08	6.90253	up
LysoPC 14:0	Lipids	21799.7	167993	1.16799	3.54305e-06	7.70623	up
LysoPE 18:2(2n isomer)	Lipids	2.05467e+06	1.16447e+07	1.16103	6.1428e-06	5.66742	up
LysoPE 18:2	Lipids	1556000	7.01347e+06	1.16741	0.000362275	4.50737	up
LysoPE 18:1	Lipids	503397	1.61717e+06	1.16992	0.00010985	3.21251	up
LysoPE 18:1(2n isomer)	Lipids	474743	2.22803e+06	1.16428	1.51027e-05	4.69313	up
LysoPC 15:0	Lipids	19162.3	116382	1.14323	0.0140268	6.07346	up
LysoPE 18:0	Lipids	65103.3	144893	1.16616	0.000186099	2.22559	up
LysoPC 16:1(2n isomer)	Lipids	25672	98538.7	1.13429	0.00483699	3.83837	up
LysoPC 16:1	Lipids	38975.3	104248	1.13311	0.00510306	2.67472	up
LysoPC 16:0(2n isomer)	Lipids	594827	2.43283e+06	1.15921	0.012855	4.08999	up
LysoPC 16:0	Lipids	4237700	2.09073e+07	1.16574	0.000757963	4.93365	up
2-α-Linolenoyl-glycerol-1-O-glucoside	Lipids	9744.47	9	1.17042	0.00429476	0.000923601	down
1-α-Linolenoyl-glycerol-3-O-glucoside	Lipids	12624	9	1.17026	0.00839097	0.000712928	down
LysoPC 18:2(2n isomer)	Lipids	8.01373e+06	16710000	1.14137	0.00370526	2.08517	up
LysoPC 18:2	Lipids	1.22347e+07	27784000	1.16934	0.000308061	2.27092	up
LysoPC 18:0(2n isomer)	Lipids	67862	178707	1.16588	0.00327347	2.63338	up
LysoPC 18:0	Lipids	328557	965200	1.16005	0.00123007	2.9377	up
LysoPC 20:2	Lipids	10862	42984.3	1.15598	0.000568074	3.9573	up
LysoPC 20:2(2n isomer)	Lipids	12361.3	37815	1.15161	0.00736795	3.05914	up
