# Supplementary material for: Combined Metabolomic and Quantitative RT-PCR Analyses Revealed the Synthetic Differences of 2-Acetyl-1-pyrroline in Aromatic and Non-Aromatic Vegetable Soybeans
Source: Int J Mol Sci. 2022 Nov 22;23(23):14529. doi: 10.3390/ijms232314529 (PMC9738111; doi:10.3390/ijms232314529)
Supplement: Supplementary file 1 [file ijms-23-14529-s001.zip › ijms-1956011-supplementary/Table S7.xlsx]

## Sheet: Sheet1
Table S7 differential accumulation metabolites (DAMs) in ZX8-S6 and ZK1754-S5 (* indicates the racemates)
Compounds	Class	ZX8-S6	ZK1754-S5	VIP	p_value	Fold_Change	Type
L-Ornithine	Amino acids and derivatives	326013	17967.3	1.33096	0.00183037	0.0551123	down
L-Methionine	Amino acids and derivatives	8.97977e+06	3.85847e+06	1.29856	0.025075	0.429685	down
L-Alanyl-L-Alanine	Amino acids and derivatives	15123.7	31996.7	1.23046	0.00844407	2.11567	up
N-Methyl-L-Glutamate	Amino acids and derivatives	17102.7	6388.27	1.27557	0.0320564	0.373525	down
N-α-Acetyl-L-ornithine	Amino acids and derivatives	3.56153e+06	410120	1.33246	0.000517732	0.115153	down
L-Arginine	Amino acids and derivatives	13208000	2859900	1.33091	4.15979e-05	0.216528	down
Homoarginine	Amino acids and derivatives	707723	182527	1.30108	0.000198481	0.257907	down
N-Monomethyl-L-arginine	Amino acids and derivatives	2811100	777623	1.3255	1.97272e-05	0.276626	down
L-Glycyl-L-phenylalanine	Amino acids and derivatives	494413	1.43327e+06	1.312	0.00288991	2.89892	up
Glycylphenylalanine	Amino acids and derivatives	209717	52662.3	1.29907	0.0254454	0.251112	down
γ-Glutamyl-L-valine	Amino acids and derivatives	135337	46486.7	1.31848	0.00706149	0.343489	down
L-γ-Glutamyl-L-leucine	Amino acids and derivatives	1667000	282817	1.32864	0.00259218	0.169656	down
L-Homocystine	Amino acids and derivatives	38484.3	8776.3	1.30267	0.00793428	0.228049	down
γ-glutamylmethionine	Amino acids and derivatives	647733	86806.7	1.3265	0.0081266	0.134016	down
γ-Glutamylphenylalanine	Amino acids and derivatives	2.65697e+07	9543200	1.32541	3.09366e-05	0.359177	down
γ-Glutamyltyrosine	Amino acids and derivatives	2.18667e+06	534377	1.32326	0.000292018	0.24438	down
Tryptophan glutamic acid	Amino acids and derivatives	47795.3	11415.2	1.2886	0.0245854	0.238836	down
3-Hydroxycinnamic Acid	Phenolic acids	49495.3	153493	1.30425	0.00969723	3.10117	up
2-Hydroxycinnamic acid	Phenolic acids	91764	187190	1.23542	0.00544417	2.03991	up
3,4-Dihydroxybenzeneacetic acid	Phenolic acids	23513	96518.7	1.32756	8.98677e-06	4.10491	up
Homogentisic acid	Phenolic acids	23585	90926.3	1.3226	0.00508848	3.85526	up
4-Methoxycinnamic acid	Phenolic acids	3210	13534.7	1.32262	0.0117338	4.21641	up
Trans-4-Hydroxycinnamic Acid Methyl Ester	Phenolic acids	9033.83	19106.3	1.2622	0.0126259	2.11498	up
Methyl caffeate	Phenolic acids	24171.7	102625	1.3278	0.00533491	4.24567	up
Ferulic acid*	Phenolic acids	43501	97542.7	1.25143	0.010022	2.24231	up
Isoferulic Acid*	Phenolic acids	38883.7	86949.7	1.25738	0.00663861	2.23615	up
1-O-Salicyl-D-glucose	Phenolic acids	530543	115037	1.32602	0.000239941	0.216829	down
1-O-Vanilloyl-D-Glucose	Phenolic acids	350023	701257	1.32466	0.00289743	2.00346	up
2,4,6-trihydroxy-acetophenone-4-O-β-D-glucopyranoside	Phenolic acids	1159900	2.67167e+06	1.32589	0.000732109	2.30336	up
3,4,5-Trimethoxyphenyl-1-O-Glucoside	Phenolic acids	3526100	8.27397e+06	1.31917	0.000474134	2.34649	up
5-O-Caffeoylshikimic acid	Phenolic acids	34714.3	94074	1.30156	0.00381293	2.70995	up
1-O-Caffeoyl-β-D-glucose	Phenolic acids	114750	285973	1.29365	0.00449551	2.49215	up
6-O-Caffeoyl-D-glucose	Phenolic acids	92914	294323	1.32389	0.00250821	3.1677	up
Coniferin	Phenolic acids	113560	310883	1.31008	0.0189844	2.73761	up
Rosmarinic acid	Phenolic acids	52563.3	15625.3	1.21489	0.0729499	0.297267	down
Isoguanine	Nucleotides and derivatives	329823	142337	1.30115	0.000561898	0.431554	down
Thymidine	Nucleotides and derivatives	18514.3	2209.6	1.03076	0.0101311	0.119345	down
Cytidine	Nucleotides and derivatives	189237	1.02094e+06	1.31887	0.0041637	5.39506	up
Cytarabine	Nucleotides and derivatives	168483	851580	1.3204	1.7523e-05	5.05439	up
Guanosine	Nucleotides and derivatives	2.59347e+06	5.64643e+06	1.33006	7.383e-06	2.17718	up
N7-Methylguanosine	Nucleotides and derivatives	27147.7	92977.7	1.29379	0.0299134	3.42489	up
2'-Deoxyinosine-5'-monophosphate	Nucleotides and derivatives	1.53873e+06	4.51857e+06	1.27621	0.00134328	2.93655	up
Adenosine 5'-monophosphate	Nucleotides and derivatives	1440100	2.92503e+06	1.26597	0.0170479	2.03113	up
3'-Adenylic Acid	Nucleotides and derivatives	1903.09	8704.27	1.23226	0.00324065	4.57376	up
3,9-Dihydroxypterocarpan	Flavonoids	34451.3	127097	1.33016	8.09299e-05	3.68917	up
Isoliquiritigenin	Flavonoids	33542.3	116873	1.3245	0.00196212	3.48435	up
2,4,4'-trihydroxychalcone	Flavonoids	27371.3	105640	1.31579	6.29238e-05	3.85951	up
Liquiritigenin	Flavonoids	273153	1.82887e+06	1.33012	4.39702e-07	6.69538	up
6-Hydroxy-2'-methoxyflavone	Flavonoids	2911.93	9	1.32954	0.0350483	0.00309073	down
Genistein	Flavonoids	72526.7	146803	1.29323	0.00103282	2.02413	up
Butin	Flavonoids	85849	272983	1.33061	0.00100862	3.17981	up
Naringenin (5,7,4'-Trihydroxyflavanone)	Flavonoids	65438.3	205463	1.31805	0.00440755	3.1398	up
Liquiritigenin-4'-O-Glucoside (Liquiritin)	Flavonoids	184170	1.72473e+06	1.33198	0.00088342	9.3649	up
Apigenin-5-O-glucoside	Flavonoids	2943700	9.89183e+06	1.29677	0.00765447	3.36034	up
Calycosin-7-O-glucoside	Flavonoids	18357000	3.99713e+07	1.28331	0.00716376	2.17744	up
Glycitin	Flavonoids	1326210	2.73187e+06	1.19052	0.0184033	2.05991	up
Luteolin-3'-O-glucoside	Flavonoids	257993	876960	1.31654	0.00147537	3.39916	up
Kaempferol-3-O-glucoside (Astragalin)	Flavonoids	194153	805347	1.30797	0.0231636	4.14799	up
Luteolin-4'-O-glucoside	Flavonoids	228287	831317	1.28176	0.0358444	3.64155	up
Kaempferol-3-O-galactoside (Trifolin)	Flavonoids	29959.3	85797.7	1.21982	0.00767245	2.8638	up
Kaempferol-7-O-glucoside	Flavonoids	26394	97853.3	1.29733	0.0153288	3.70741	up
Aureusidin-4-O-glucoside	Flavonoids	230253	991557	1.3261	0.0044767	4.30637	up
Eriodictyol-7-O-glucoside	Flavonoids	134628	300407	1.12116	0.0388726	2.23138	up
Diosmetin-7-O-galactoside*	Flavonoids	594353	1257300	1.27427	0.004111	2.11541	up
Kaempferol-3-O-(6''-acetyl)glucoside	Flavonoids	211947	828250	1.31241	0.0220384	3.90782	up
Pinocembrin-7-O-(6''-O-malonyl)glucoside	Flavonoids	331993	767933	1.32467	0.00391618	2.3131	up
Genistein-7-O-(6''-malonyl)glucoside	Flavonoids	490440	1624800	1.30604	0.0293077	3.31294	up
Kaempferol-3-O-(6''-malonyl)glucoside*	Flavonoids	1340500	3.51123e+06	1.30148	0.0258701	2.61935	up
Kaempferol-3-O-(6''-malonyl)galactoside*	Flavonoids	1107700	4277300	1.32904	0.00196558	3.86142	up
Kaempferide-3-O-(6''-malonyl)glucoside	Flavonoids	171617	400787	1.3105	0.010614	2.33536	up
Daidzein-7-O-Glucoside-4'-O-Apioside	Flavonoids	2.58453e+06	1.0328e+06	1.30284	0.0147152	0.399607	down
Apigenin-7-O-(2''-glucosyl)arabinoside	Flavonoids	151307	63304.7	1.3162	0.00056002	0.418386	down
Hispidulin-8-C-(2''-O-xylosyl)xyloside	Flavonoids	701820	310787	1.23169	0.0612957	0.44283	down
Pinocembrin-7-O-neohesperidoside	Flavonoids	9	45844.7	1.33279	0.000850521	5093.85	up
Pinocembrin-7-O-rutinoside	Flavonoids	7215.27	68434.7	1.32864	0.000322342	9.4847	up
Kaempferol-3-O-sambubioside	Flavonoids	23872	3258.53	1.024	0.017837	0.1365	down
Luteolin-7-O-rutinoside	Flavonoids	48218.7	168130	1.3071	0.000161451	3.48682	up
Kaempferol-3-O-rutinoside(Nicotiflorin)	Flavonoids	17032	60933.3	1.27452	0.00336756	3.57758	up
Kaempferol-3-O-neohesperidoside	Flavonoids	508890	1.93337e+06	1.32401	0.00187668	3.79918	up
Luteolin-7-O-neohesperidoside (Lonicerin)	Flavonoids	441643	2030300	1.3036	0.00274649	4.59715	up
Luteolin-6,8-di-C-glucoside	Flavonoids	20193.7	6340	1.30653	0.00885385	0.31396	down
Kaempferol-3,7-di-O-glucoside	Flavonoids	21207.3	50898.3	1.258	0.00369784	2.40003	up
Luteolin-7-O-(6''-malonyl)glucoside-5-O-rhamnoside	Flavonoids	133887	697220	1.32325	0.010744	5.20754	up
Kaempferol-3-O-(6''-Malonyl)glucoside-7-O-Glucoside	Flavonoids	34485.3	93885	1.19201	0.106004	2.72246	up
Isovitexin-2''-O-(6'''-p-coumaroyl)glucoside	Flavonoids	9	510470	1.33264	0.00910553	56718.9	up
2,6-Dimethoxy-1,4-benzoquinone	Quinones	552363	1165030	1.24884	0.0234448	2.10917	up
D-Threose	Others	48881.7	16506	1.25813	0.00111734	0.337673	down
D-Threonic Acid	Others	96449	210940	1.27446	0.00490069	2.18706	up
L-Ascorbic acid (Vitamin C)	Others	257433	845627	1.31125	0.0026392	3.28484	up
Erythorbic Acid; Isoascorbic Acid	Others	65729.7	141020	1.23376	0.0190007	2.14545	up
D-Mannitol*	Others	11773.6	23564.3	1.05559	0.0745661	2.00146	up
D-Galacturonic acid*	Others	590380	4884000	1.33177	0.00051471	8.27264	up
D-Glucoronic acid*	Others	734200	5539600	1.32973	0.000835647	7.54508	up
D-Pinitol	Others	52199.3	124667	1.27274	0.034745	2.38828	up
Gluconic acid	Others	570023	1.59803e+06	1.32969	0.000657017	2.80345	up
Vidarabine	Others	1.60933e+06	3.44687e+06	1.25435	0.0574624	2.1418	up
Kushenin	Others	2394.5	5068	1.0375	0.0479559	2.11652	up
Pyridoxine-5'-O-glucoside	Others	446747	127014	1.30222	0.000557816	0.284308	down
Riboflavin (Vitamin B2)	Others	60947.3	127014	1.17199	0.077655	2.08399	up
Verbascose	Others	17811.7	7335.67	1.18946	0.0185179	0.411846	down
Histamine	Alkaloids	63035.3	27464.3	1.22339	0.038954	0.435697	down
4-Hydroxymandelonitrile	Alkaloids	9.76907e+06	4.22703e+06	1.30967	0.00106811	0.432696	down
Soyasaponin βc	Terpenoids	86076.7	180540	1.2998	0.00133821	2.09743	up
Hydroxypyruvic acid*	Organic acids	49307.3	108673	1.29293	0.00195155	2.204	up
Tartronate semialdehyde*	Organic acids	61443.3	124453	1.11508	0.0527131	2.02549	up
6-Aminocaproic acid	Organic acids	965143	370683	1.16451	0.0386881	0.384071	down
3-Ureidopropionic Acid	Organic acids	262277	125697	1.3244	4.19488e-05	0.479252	down
2-Hydroxyisocaproic acid	Organic acids	106700	46380.7	1.25332	0.0555231	0.434682	down
6-Hydroxyhexanoic acid	Organic acids	12826.3	27205.7	1.21048	0.0822225	2.12108	up
4-Acetamidobutyric acid	Organic acids	82552.3	27497.7	1.23924	0.00523376	0.333094	down
2-Isopropylmalic Acid	Organic acids	650700	2.10267e+06	1.31363	0.00786308	3.23139	up
2-Propylmalic Acid*	Organic acids	746400	2.13677e+06	1.32286	0.00649976	2.86276	up
3-Isopropylmalic Acid*	Organic acids	714473	2.06573e+06	1.32011	0.00243574	2.89127	up
2,6-Diaminooimelic acid	Organic acids	633610	1671600	1.31208	0.00477002	2.63822	up
Choline Alfoscerate	Lipids	3.68967e+06	577667	1.33101	0.00231759	0.156563	down
Petroselinic acid	Lipids	8.15807e+06	1.87667e+07	1.3246	0.00176979	2.30038	up
Elaidic Acid	Lipids	30463000	6.95887e+07	1.32738	0.00179971	2.28437	up
11-Octadecanoic acid(Vaccenic acid)	Lipids	6.54453e+06	16118000	1.31914	5.63615e-05	2.46282	up
9-Hydroxy-10,12,15-octadecatrienoic acid*	Lipids	3033.97	9	1.33179	0.0170031	0.00296641	down
13S-Hydroxy-9Z,11E,15Z-octadecatrienoic acid	Lipids	5536.8	2104.13	1.24254	0.00561723	0.380027	down
13-KODE; (9Z,11E)-13-Oxooctadeca-9,11-dienoic acid*	Lipids	3632.5	9	1.33227	0.00983194	0.00247763	down
9(10)-EpOME;(9R,10S)-(12Z)-9,10-Epoxyoctadecenoic acid	Lipids	2933.63	9	1.33231	0.00759448	0.00306787	down
5S,8R-DiHODE; (5S,8R,9Z,12Z)-5,8-Dihydroxyoctadeca-9,12-dienoate	Lipids	5420.47	9	1.33219	0.013082	0.00166037	down
