# Supplementary material for: Combined Metabolomic and Quantitative RT-PCR Analyses Revealed the Synthetic Differences of 2-Acetyl-1-pyrroline in Aromatic and Non-Aromatic Vegetable Soybeans
Source: Int J Mol Sci. 2022 Nov 22;23(23):14529. doi: 10.3390/ijms232314529 (PMC9738111; doi:10.3390/ijms232314529)
Supplement: Supplementary file 1 [file ijms-23-14529-s001.zip › ijms-1956011-supplementary/Table S9.xlsx]

## Sheet: gene summary2
Table S9 RNA-Seq of candidate genes from Phytozome. Darker green indicates higher expression levels of the gene and lower vice versa.
	EC	Gene	Leaves	Shoot Apical Meristem	Flower	Pod	Root	Root Hairs	Seed	Stem	Nodules
GAPDH	1.2.1.12	Glyma.03G092700	3.41	20.3	7.59	25.7	30.7	55.4	46.6	28.3	107
	1.2.1.12	Glyma.04G015900	251	78.3	22.6	51.5	5.79	6.97	19.7	34.4	1.06
	1.2.1.12	Glyma.04G193400	234	352	140	370	274	433	554	305	308
	1.2.1.12	Glyma.04G193500	265	185	148	191	187	273	335	238	184
	1.2.1.12	Glyma.05G073100	0.234	0.0812	0.723	0.207	0.179	0.513	0.147	0.179	0.0332
	1.2.1.12	Glyma.06G015900	333	91.7	17.1	40.3	7.41	10	15.4	37.1	1.21
	1.2.1.12	Glyma.06G172600	379	400	317	531	249	415	787	441	303
	1.2.1.12	Glyma.06G172700	347	390	129	195	259	294	161	246	208
	1.2.1.12	Glyma.09G099700	0	0	0	0	0	0	0	0	0
	1.2.1.12	Glyma.11G247600	9.92	7.86	7.22	43.6	255	173	72.4	35.7	158
	1.2.1.12	Glyma.16G044900	366	152	22.3	93.3	12.2	13	77.7	50.9	2.64
	1.2.1.12	Glyma.16G081400	7.62	14.7	10.8	14.7	24.3	37	16.5	12.7	58.7
	1.2.1.12	Glyma.16G150200	0	0	0	0	0	0	0	0	0
	1.2.1.12	Glyma.18G009700	218	44.5	13.9	77.7	93.1	201	169	106	324
	1.2.1.12	Glyma.19G078300	0	0.12	0.598	0.578	0.0348	0.159	0.558	0.0299	0.0612
	1.2.1.12	Glyma.19G106800	556	148	22.1	94.2	11.4	13.2	70.8	50.4	2.9
TPI	5.3.1.1	Glyma.03G185800	53.2	30.5	22.6	46	28.4	53	32.8	31.5	52.1
	5.3.1.1	Glyma.10G059500	25.8	35.8	9.92	25.2	6.26	11.5	27.5	23.3	14.6
	5.3.1.1	Glyma.13G146200	10.5	26.1	4.22	16.9	5.01	6.04	9.17	23.5	13.2
	5.3.1.1	Glyma.13G336200	306	250	124	312	286	313	764	264	203
	5.3.1.1	Glyma.15G038100	250	191	97.3	236	275	362	306	212	210
	5.3.1.1	Glyma.19G186000	39.5	28.2	17.7	46.6	10.7	30.6	29.1	23.9	21.8
FBA	4.1.2.13	Glyma.02G222400	232	244	118	284	369	437	477	313	312
	4.1.2.13	Glyma.02G303000	24.9	2.53	0.471	1.31	0.0639	0.142	0.134	0.064	0.11
	4.1.2.13	Glyma.03G191500	38.6	32.2	41.1	89	125	120	40	150	76.7
	4.1.2.13	Glyma.04G008300	431	70	20.6	57	2.9	4.09	8.55	39.2	3.11
	4.1.2.13	Glyma.07G103000	16.9	13	18.3	22.8	14	16.5	11.2	16	16.8
	4.1.2.13	Glyma.10G066700	4.43	5.71	2.33	2.46	25.2	58.7	0.121	1.87	78
	4.1.2.13	Glyma.10G268500	15.4	24.4	42.6	27.7	59.6	52.7	18.4	29.8	31.3
	4.1.2.13	Glyma.11G111100	194	19	6.24	34.4	0.698	2.54	61.3	14.7	0.62
	4.1.2.13	Glyma.11G111400	527	52.8	20.7	124	2.47	3.35	85.6	25.6	1.78
	4.1.2.13	Glyma.12G037400	630	95.1	24.4	133	5.01	8.64	279	30.8	2.72
	4.1.2.13	Glyma.12G153000	0.229	0.289	0.145	0.606	0.603	0.983	0.346	0.588	0.547
	4.1.2.13	Glyma.13G151800	0.76	0.213	0.643	1.83	3.54	15.9	0	0.684	39.9
	4.1.2.13	Glyma.14G010900	99.5	6.8	0.415	5.14	0.0856	0.255	0.668	1.59	0.0738
	4.1.2.13	Glyma.14G189400	106	172	72.1	192	410	608	276	147	281
	4.1.2.13	Glyma.20G122500	15.4	29.7	17.2	49.5	81.8	84.2	30.4	46.6	47.6
GPD	1.2.1.9	Glyma.02G202500	161	38.7	47.9	64	2.29	2.04	14	18.6	0.891
	1.2.1.9	Glyma.17G075300	87.3	36.4	28.1	87.1	5.02	2.41	59.6	32.3	0.977
	1.2.1.9	Glyma.17G218200	0.161	0.794	0.538	3.66	4.23	2.4	0.792	2.06	3.77
P5CR	1.5.1.2	Glyma.03G129100	1.64	3.33	5.39	3.05	1.07	2.27	0.973	0.782	2.19
	1.5.1.2	Glyma.19G131500	13.8	26.4	15.2	26.3	22.8	47.4	79.8	23	36.8
PRODH	1.5.5.2	Glyma.08G255900	0	0	123	0.0129	0.0218	0.0096	0	0.229	0
	1.5.5.2	Glyma.13G049700	1.36	4.57	25.7	17	38.5	25.1	42.7	4.54	9.94
	1.5.5.2	Glyma.18G278900	13.7	2.31	10.6	6.51	1.46	0.413	0.948	2.03	0.696
	1.5.5.2	Glyma.19G042900	0.021	0.0209	2.19	0.513	0.098	0.332	6.95	0.125	0.324
	1.5.5.2	Glyma.19G043000	2.28	2.39	22.6	11.5	8.12	7.85	47.2	4.72	10.8
P5CS	2.7.2.11	Glyma.01G099800	0.57	1.89	10.3	6.85	3.58	9.24	4.8	6.05	7.46
	2.7.2.11	Glyma.02G251100	9.65	6.42	4.52	7.12	25.5	13.3	19.4	5	10.9
	2.7.2.11	Glyma.03G069400	0.1	9.38	7.47	2.32	5.91	14.1	1.37	2.77	1.2
	2.7.2.11	Glyma.07G137300	1.26	5.08	3.14	5.96	0.619	2.95	0.317	15.4	1.77
	2.7.2.11	Glyma.14G065600	14.9	12.3	12.1	9.63	15.6	18.3	18.7	8.78	18.7
	2.7.2.11	Glyma.14G110800	0	0.0746	0	0.0168	0	0.0398	0	0.183	0.494
	2.7.2.11	Glyma.18G034300	1.23	14.8	5.07	13.1	3.36	5.9	14.7	7.17	5.83
	2.7.2.11	Glyma.18G188000	0.785	0.166	0.256	0.331	0.102	0.177	0.223	0.186	0.132
OAT	2.6.1.13	Glyma.02G189300	0.174	0.197	0.18	0.348	0.0593	0.207	0.374	0.384	0.737
	2.6.1.13	Glyma.05G141900	14	11.2	12.2	10.6	15.9	12.3	8.32	12	13
	2.6.1.13	Glyma.08G097800	11.9	8.29	11	11.6	11.6	28.3	12.3	11.2	7.94
	2.6.1.13	Glyma.08G245800	0.157	0.0778	0.0257	0.041	0.0664	0.0559	0.0269	0.0636	0.0403
	2.6.1.13	Glyma.15G181100	0	0	0	0	0	0	0	0	0
	2.6.1.13	Glyma.17G184700	0.0874	0.0064	0.182	0.126	0.0039	0.000815	0.000724	0.0906	0.00599
	2.6.1.13	Glyma.19G189900	0.448	0.518	0.0536	0.095	0	0.747	0.154	0.525	0.177
P5CDH	1.2.1.88	Glyma.05G029100	0.214	0.101	0.32	1.39	2.43	0.298	0.175	0.171	0.326
	1.2.1.88	Glyma.05G029200	1.23	1.4	8.88	28.5	33.9	76.9	12.6	2.17	23.4
	1.2.1.88	Glyma.17G097700	0	0.0842	0.0522	0.392	0	1.14	0.0383	0.0424	0.297
	1.2.1.88	Glyma.17G097800	12.4	16.9	10.7	21.7	9.86	14.4	29.2	12.9	10.4
	1.2.1.88	Glyma.20G086900	0	0	0	0	0	0	0	0	0
