# Supplementary figures and images for: Combined Metabolomic and Quantitative RT-PCR Analyses Revealed the Synthetic Differences of 2-Acetyl-1-pyrroline in Aromatic and Non-Aromatic Vegetable Soybeans
Source: MDPI journal article supplement (doi:10.3390/ijms232314529), 2022-11-22

**Figure S5.** Standard curve of GABA

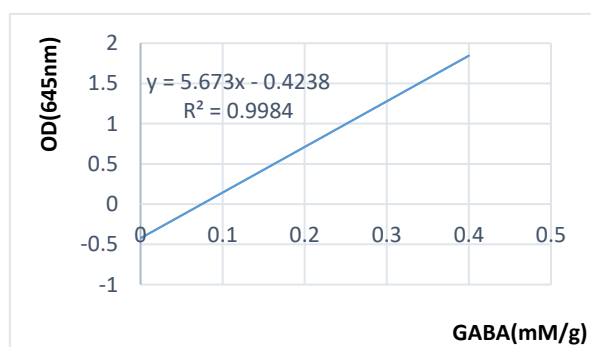

Supplement: s1 [file s1]

**Figure S4.** Standard curve of MG

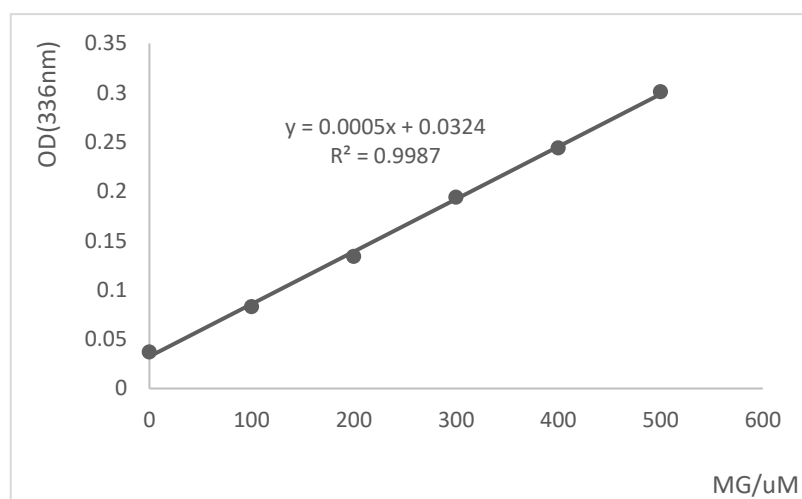

Supplement: s1 [file s1]

**Figure S3.** Seed photos of ZX8 and ZK1754 at different developmental stages

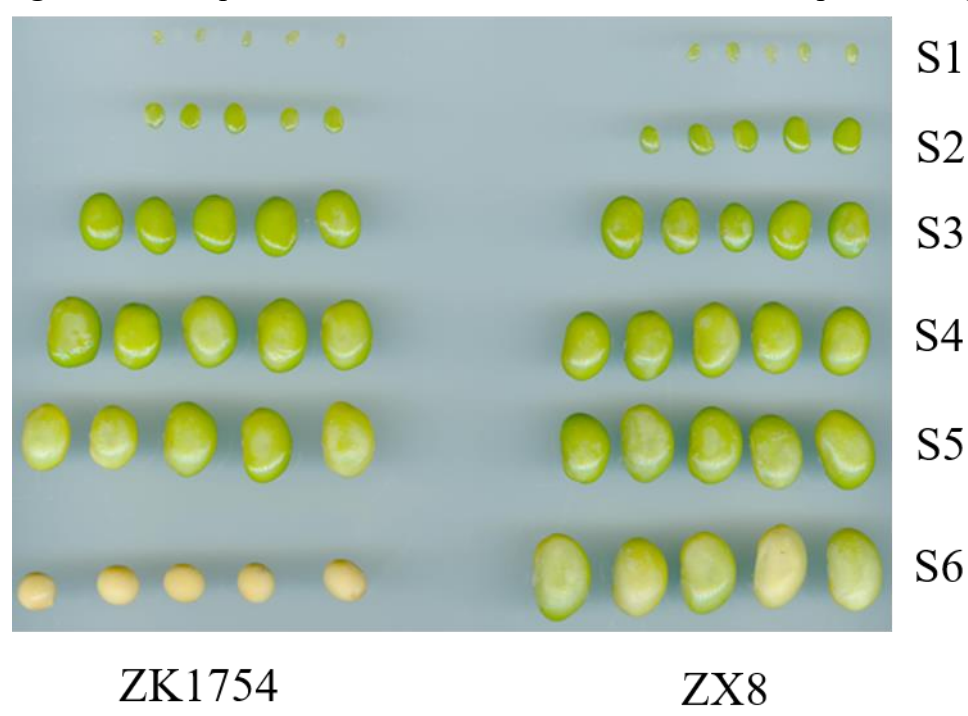

Supplement: s1 [file s1]
